# Supplementary material for: The acid-sulfate zone and the mineral alteration styles of the Roman Puteolis (Neapolitan area, Italy): clues on fluid fracturing progression at the Campi Flegrei volcano
Source: Copernicus journal article supplement (doi:10.5194/se-2019-53), 2019-05-08
Supplement: Supplementary file 1 [file se-2019-53-supplement.pdf]

## Supplementary materials

Table S1 – List of samples, collection date, temperature and mineralogical associations as resulting by XRD analyses and detailed by FTIR study. The sampling includes water spring sampled at Stufe di Nerone. In the temperature column: tc, thermo couple (see chapter 2.2 Sampling and analytical techniques), infr, infrared gun. In the mineralogy column: ?, for minerals to be further investigated; minerals in red are approximate attribution based on XRD patterns. The orange cells evidence water samples.

| Sample name         | Sampled area | Location*     | Details on sites and sample | Temperature (°C) tc, infr | Sampling date | Mineralogy                                                                 | pH | Note              |
|---------------------|--------------|---------------|-----------------------------|---------------------------|---------------|----------------------------------------------------------------------------|----|-------------------|
| Ss1                 | Pisciarelli  | L1            | -                           | -                         | 09-Jan-13     | Sulfur                                                                     | nd | Piochi et al 2015 |
| S <sub>tot</sub> 2  | Pisciarelli  | L1            | -                           | -                         | 09-Jan-13     | Pickeringite, Alunite, Alunogen, Alum-(K), Sulfur, Amarillite, Mereiterite | nd | Piochi et al 2015 |
| S3                  | Pisciarelli  | L1            | -                           | -                         | 09-Jan-13     | Alunite, Alum-(K)                                                          | nd | Piochi et al 2015 |
| S <sub>tot</sub> 4  | Pisciarelli  | L1            | -                           | -                         | 09-Jan-13     | Alunogen, Alunite, Sulfur, Kaolinite                                       | nd | Piochi et al 2015 |
| S5                  | Pisciarelli  | L2            | -                           | -                         | 09-Jan-13     | Quartz, Amorphous                                                          | nd | Piochi et al 2015 |
| S7                  | Pisciarelli  | L2            | -                           | -                         | 09-Jan-13     | Alunite, Alunogen, Illite/Montmorillonite                                  | nd | Piochi et al 2015 |
| S10                 | Pisciarelli  | L2            | -                           | -                         | 21-Mar-13     | Alunite, Illite/Montmorillonite                                            | nd | Piochi et al 2015 |
| Sf12                | Pisciarelli  | L3 - mud pool | mud                         | -                         | 21-Mar-13     | Alunite, Sulfur, K-Feldspar, Amorphous, Illite                             | nd | Piochi et al 2015 |
| Sf14                | Pisciarelli  | L3 - mud pool | mud                         | -                         | 10-Oct-13     | Alunite Sulfur, K-Feldspar, Amorphous, Illite                              | nd | Piochi et al 2015 |
| S <sub>tot</sub> 16 | Pisciarelli  | L4            | -                           | -                         | 21-Mar-13     | Quartz, Amorphous, Illite/Montmorillonite, Kaolinite                       | nd | Piochi et al 2015 |
| ASA 12-3            | Solfatara    | ASA           | NE-slope, uppermost part    | -                         | 11-Dec-13     | Alunite, Alunogen                                                          | nd | Piochi et al 2015 |
| AP 12-3             | Pisciarelli  | L1            | -                           | -                         | 11-Dec-13     | Alunite, Alunogen, Alum-(K)                                                | nd | Piochi et al 2015 |
| MP^                 | Pisciarelli  | L3 - mud pool | mud                         | -                         | 11-Dec-13     | Alunite, Sulfur K-Feldspar, Amorphous, Illite                              | nd | Piochi et al 2015 |

|                         |             |               |                               |   |           |                                               |    |                   |
|-------------------------|-------------|---------------|-------------------------------|---|-----------|-----------------------------------------------|----|-------------------|
| <b>MS</b>               | Solfatara   | pool          | mud                           | - | 11-Dec-13 | Alunite, Sulfur K-Feldspar, Amorphous, Illite | nd | Piochi et al 2015 |
| <b>Red_1_1/15</b>       | Pisciarelli | L50           | reddish deposits              | - | 29-Jan-15 | Alunite, Hematite                             | nd | Piochi et al 2015 |
| <b>Sg12</b>             | Pisciarelli | L3 - mud pool | separated from the mud        | - | 17-Apr-13 | Gypsum                                        | nd | Piochi et al 2015 |
| <b>Lava</b>             | Solfatara   | L5            | NW area from Stuff, dome      | - | 24-Jun-14 | Alunite, Analcime, Quartz                     | nd | Piochi et al 2015 |
| <b>Tephra</b>           | Solfatara   | L5            | NW area from Stuff            | - | 24-Jun-14 | Analcime, Quartz, Gypsum, Illite              | nd | Piochi et al 2015 |
| <b>S8</b>               | Pisciarelli | L2            | -                             | - | 09-Jan-13 | Alunite                                       | nd | Piochi et al 2015 |
| <b>S9</b>               | Pisciarelli | L2            | -                             | - | 11-Mar-13 | Sulfur                                        | nd | Piochi et al 2015 |
| <b>Ss15</b>             | Pisciarelli | L4            | -                             | - | 21-Mar-13 | Sulfur                                        | nd | Piochi et al 2015 |
| <b>Sp13</b>             | Pisciarelli | L3 - mud pool | separated from the mud        | - | 17-Apr-13 | Pyrite                                        | nd | Piochi et al 2015 |
| <b>ASA 24-9</b>         | Solfatara   | ASA           | NE-slope, uppermost part      | - | 24-Sep-14 | Alunite                                       | nd | Piochi et al 2015 |
| <b>AP 24-9_2b</b>       | Pisciarelli | L1            | -                             | - | 24-Sep-14 | Alunite                                       | nd | Piochi et al 2015 |
| <b>AP 24-9_2a</b>       | Pisciarelli | L1            | -                             | - | 24-Sep-14 | Alunite                                       | nd | Piochi et al 2015 |
| <b>AP 24-9</b>          | Pisciarelli | L1            | -                             | - | 24-Sep-14 | Alunite                                       | nd | Piochi et al 2015 |
| <b>ASA 12-3</b>         | Solfatara   | ASA           | NE-slope, uppermost height    | - | 11-Dec-13 | Alunite                                       | nd | Piochi et al 2015 |
| <b>AP 12-3</b>          | Pisciarelli | L1            | -                             | - | 09-Jan-13 | Alunite                                       | nd | Piochi et al 2015 |
| <b>Sample 2 alunite</b> | Pisciarelli | L1            | -                             | - | 09-Jan-13 | Alunite                                       | nd | Piochi et al 2015 |
| <b>SSA 24-9 S</b>       | Solfatara   | ASA           | NE-slope, uppermost height    | - | 24-Sep-14 | Sulfur                                        | nd | Piochi et al 2015 |
| <b>SS 24-9 bg S</b>     | Solfatara   | Bocca Grande  | -                             | - | 24-Sep-14 | Sulfur                                        | nd | Piochi et al 2015 |
| <b>SS 24-9b S</b>       | Solfatara   | ASA           | NE-slope, lowermost height    | - | 24-Sep-14 | Sulfur                                        | nd | Piochi et al 2015 |
| <b>SS 24-9i S</b>       | Solfatara   | ASA           | NE-slope, intermediate height | - | 24-Sep-14 | Sulfur                                        | nd | Piochi et al 2015 |

|                                              |             |               |                                     |   |           |                   |    |                   |
|----------------------------------------------|-------------|---------------|-------------------------------------|---|-----------|-------------------|----|-------------------|
| <b>SP 24-9 S</b>                             | Pisciarelli | L1            | -                                   | - | 24-Sep-14 | Sulfur            | nd | Piochi et al 2015 |
| <b>SP 12-3</b>                               | Pisciarelli | L1 vent       | -                                   | - | 11-Dec-13 | Sulfur            | nd | Piochi et al 2015 |
| <b>SS 12-3 b</b>                             | Solfatara   | ASA           | NE-slope,<br>lowermost<br>height    | - | 11-Dec-13 | Sulfur            | nd | Piochi et al 2015 |
| <b>SS 12-3 i</b>                             | Solfatara   | ASA           | NE-slope,<br>intermediate<br>height | - | 11-Dec-13 | Sulfur            | nd | Piochi et al 2015 |
| <b>SSA 12-3</b>                              | Solfatara   | ASA           | NE-slope,<br>uppermost<br>height    | - | 11-Dec-13 | Sulfur            | nd | Piochi et al 2015 |
| <b>SS 12-13 BG</b>                           | Solfatara   | Bocca Grande  | -                                   | - | 11-Dec-13 | Sulfur            | nd | Piochi et al 2015 |
| <b>Sample 6 Sulfur</b>                       | Pisciarelli | L1            | -                                   | - | 09-Jan-13 | Sulfur            | nd | Piochi et al 2015 |
| <b>Sample 11 Sulfur</b>                      | Pisciarelli | L4            | -                                   | - | 09-Jan-13 | Sulfur            | nd | Piochi et al 2015 |
| <b>Sample 4 Sulfur</b>                       | Pisciarelli | L1            | -                                   | - | 09-Jan-13 | Sulfur            | nd | Piochi et al 2015 |
| <b>Sample 2 Sulfur</b>                       | Pisciarelli | L1            | -                                   | - | 09-Jan-13 | Sulfur            | nd | Piochi et al 2015 |
| <b>MS 24-9 Ag<sub>2</sub>S - elemental S</b> | Solfatara   | Mud pool      | separated from<br>mud               | - | 24-Sep-14 | Sulfur in the mud | nd | Piochi et al 2015 |
| <b>MP 24-9 Ag<sub>2</sub>S - elemental S</b> | Pisciarelli | Mud pool      | separated from<br>mud               | - | 24-Sep-14 | Sulfur in the mud | nd | Piochi et al 2015 |
| <b>Geiser Mud - elemental S</b>              | Pisciarelli | Opened Geiser | -                                   | - | 11-Dec-13 | Sulfur in the mud | nd | Piochi et al 2015 |
| <b>Solfatara - elemental S</b>               | Solfatara   | Mud pool      | separated from<br>mud               | - | 09-Feb-13 | Sulfur in the mud | nd | Piochi et al 2015 |
| <b>MP 12-3 - elemental S</b>                 | Pisciarelli | Mud pool      | separated from<br>mud               | - | 11-Dec-13 | Sulfur in the mud | nd | Piochi et al 2015 |
| <b>MS 12-3 - elemental S</b>                 | Solfatara   | Mud pool      | separated from<br>mud               | - | 11-Dec-13 | Sulfur in the mud | nd | Piochi et al 2015 |
| <b>Geiser Mud CRS+AVS</b>                    | Pisciarelli | Opened Geiser | -                                   | - | 01-Mar-14 | Bulk mud          | nd | Piochi et al 2015 |
| <b>Solfatara CRS+AVS</b>                     | Solfatara   | Mud pool      | -                                   | - | 01-May-13 | Bulk mud          | nd | Piochi et al 2015 |
| <b>MP 12-3 CRS+AVS</b>                       | Pisciarelli | L3 - mud pool | mud                                 | - | 11-Dec-13 | Bulk mud          | nd | Piochi et al 2015 |
| <b>MS 12-3 CRS+AVS</b>                       | Solfatara   | Mud pool      | -                                   | - | 11-Dec-13 | Bulk mud          | nd | Piochi et al 2015 |

|                         |             |                      |                                           |      |           |                                                           |    |   |
|-------------------------|-------------|----------------------|-------------------------------------------|------|-----------|-----------------------------------------------------------|----|---|
| <b>L1c S/11-15</b>      | Pisciarelli | L1 vent              | cream-like                                | 90.1 | 09-Nov-15 | -                                                         | nd | - |
| <b>L1a S/11-15</b>      | Pisciarelli | L1 wall              | minute Sulfur crystals                    | -    | 09-Nov-15 | -                                                         | nd | - |
| <b>L1d wr/11-15</b>     | Pisciarelli | L1 wall              | whole-rock                                | -    | 09-Nov-15 | Alunogen                                                  | nd | - |
| <b>L1d1 al/11-15</b>    | Pisciarelli | L1 wall              | hot soft white efflorescence (neve calda) | -    | 09-Nov-15 | Alunogen, Meta-alunogen, Amorphous                        | nd | - |
| <b>L1d2 white/11-15</b> | Pisciarelli | L1 wall              | white                                     | -    | 09-Nov-15 | Ammonium sulfate, Alunogen, Amorphous                     | nd | - |
| <b>MP/11-15</b>         | Pisciarelli | Mud pool             | black mud                                 | -    | 09-Nov-15 | Pyrite, Mica/Clay, Alunite, K-feldspar, Sulfur, Amorphous | nd | - |
| <b>P PP/11-15</b>       | Pisciarelli | Opened Geiser        | argilla                                   | 52   | 09-Nov-15 | nd                                                        | nd | - |
| <b>P PP1/11-15</b>      | Pisciarelli | Opened Geiser        | argilla                                   | 92°C | 09-Nov-15 | Pyrite, Clay, Alum-(K), Sulfur, Amorphous                 | nd | - |
| <b>P PPv/11-15</b>      | Pisciarelli | L19 Geiser-pool wall | green                                     | 34.2 | 09-Nov-15 | Sulfur, Ammonium sulfate, Alunite, Montmorillonite        | nd | - |
| <b>P PPb/11-15</b>      | Pisciarelli | L19 Geiser-pool wall | beige                                     | 50.2 | 09-Nov-15 | Illite/Montmorillonite, Alunite                           | nd | - |
| <b>P Pv/11-15</b>       | Pisciarelli | L20 new vents        | argilla                                   | 60.5 | 09-Nov-15 | Sulfur, Ammonium sulfate, Alunite, Montmorillonite        | nd | - |
| <b>P L50 yellow</b>     | Pisciarelli | L50 - high NW slope  | yellow ashy-to-sandy deposits             | -    | 09-Nov-15 | Jarosite, Chabazite?, Alunite, Amorphous                  | nd | - |
| <b>P L50 white</b>      | Pisciarelli | L50 - high NW slope  | white ashy-to-sandy deposits              | -    | 09-Nov-15 | Alunite, Clay?, Amorphous                                 | nd | - |
| <b>P L50 red</b>        | Pisciarelli | L50 - high NW slope  | reddish ashy-to-sandy deposits            | -    | 09-Nov-15 | Fe-oxide, Jarosite, Alunite, Amorphous                    | nd | - |
| <b>SP/11-15</b>         | Solfatara   | Mud pool             | mud                                       | 76.7 | 09-Nov-15 | -                                                         | nd | - |
| <b>BG wr/11-15</b>      | Solfatara   | Bocca Grande         | yellow and black portion at fumarole      | 93.1 | 09-Nov-15 | Pyrite, high Amorphous content                            | nd | - |
| <b>BG pg/11-15</b>      | Solfatara   | Bocca Grande         | yellow portion at fumarole above          | -    | 09-Nov-15 | Sulfur                                                    | nd | - |

|                      |             |                      |                                 |         |           |                                                                   |    |   |
|----------------------|-------------|----------------------|---------------------------------|---------|-----------|-------------------------------------------------------------------|----|---|
| <b>SStg/11-15</b>    | Solfatara   | SSt- Stuff           | light yellow S                  | 63.5-93 | 09-Nov-15 | Sulfur                                                            | nd | - |
| <b>SStb/11-15</b>    | Solfatara   | SSt- Stuff           | whitish                         | 63.5-93 | 09-Nov-15 | Alunite, Alunogen, <b>As-Fe bearing phases</b> , Amorphous        | nd | - |
| <b>SStgf/11-15</b>   | Solfatara   | SSt- Stuff           | yellow S crystals               | 63.5-93 | 09-Nov-15 | Sulfur                                                            | nd | - |
| <b>SStgc/11-15</b>   | Solfatara   | SSt- Stuff           | columnar S                      | -       | 09-Nov-15 | Sulfur                                                            | nd | - |
| <b>L1v PSc/6-16</b>  | Pisciarelli | L1vent               | crystalline                     | >87     | 14-Jun-16 | Sulfur                                                            | nd | - |
| <b>L1v PGw/6-16</b>  | Pisciarelli | L1 vent              | gray lenses                     | >87     | 14-Jun-16 | Halloysite?, Fe-Mg-Ti oxide, Amorphous                            | nd | - |
| <b>L1v PSg/6-16</b>  | Pisciarelli | L1 vent              | S liquid?                       | >87     | 14-Jun-16 | very strange pattern                                              | nd | - |
| <b>L1v Pwc/6-16</b>  | Pisciarelli | L1 vent              | cream-like                      | >87     | 14-Jun-16 | Sulfur, <b>Sb-sulfide</b> , Fe-oxide                              | nd | - |
| <b>L1 Pv/6-16</b>    | Pisciarelli | L1 wall              | vitreous                        | 56.9    | 14-Jun-16 | Clay, Alunite, Quartz, Amorphous                                  | nd | - |
| <b>L1 PvSc/6-16</b>  | Pisciarelli | L1 wall              | vitreous                        | 56.9    | 14-Jun-16 | Sulfur                                                            | nd | - |
| <b>L1 Pwh/6-16</b>   | Pisciarelli | L1 wall              | -                               | 56.9    | 14-Jun-16 | -                                                                 | nd | - |
| <b>L1 Psalt/6-16</b> | Pisciarelli | L1 wall              | saline crust                    | 67      | 14-Jun-16 | Alum-(K), Alunogen                                                | nd | - |
| <b>L1Pblack/6-16</b> | Pisciarelli | L1 wall              | blackish, at a fracture on wall | 67      | 14-Jun-16 | <b>Sulfur plu beta sulfur</b> (shifted pattern), Amorphous        | nd | - |
| <b>MP/6-16</b>       | Pisciarelli | L3 - mud pool        | mud                             | >70     | 14-Jun-16 | Alunite, Sulfur, K-feldspar, Clay, Amorphous                      | nd | - |
| <b>Geiser mud</b>    | Pisciarelli | Opened Geiser        | argilla                         | >90     | 14-Jun-16 | Halotrichite?, Sulfur, Alunite, Illite/montmorillonite, Amorphous | nd | - |
| <b>GnvW bl/6-16</b>  | Pisciarelli | L19 Geiser-pool wall | black argilla                   | 74.7    | 14-Jun-16 | Alunite, Sb-sulfur, Amorphous                                     | nd | - |
| <b>GnvW be/6-16</b>  | Pisciarelli | L19 Geiser-pool wall | plastered beige argilla         | 74.7    | 14-Jun-16 | Mascagnite, Alunite, <b>Arseniate or Phosphate</b> , Amorphous    | nd | - |
| <b>P L20 v1/6-16</b> | Pisciarelli | L20 new vent1        | gray argilla                    | 90      | 14-Jun-16 | Ammonium sulfate, Alunite,                                        | nd | - |

|                          |             |                                 |                                                      |      |           |                                                        |    |   |
|--------------------------|-------------|---------------------------------|------------------------------------------------------|------|-----------|--------------------------------------------------------|----|---|
|                          |             |                                 |                                                      |      |           | Illite/montmorillonite,<br>Amorphous                   |    |   |
| <b>P L20 v2 S/6-16</b>   | Pisciarelli | L20 new<br>vent2                | Sulfur                                               | 44   | 14-Jun-16 | Sulfur (B sulfur)                                      | nd | - |
| <b>P L50 white/6-16</b>  | Pisciarelli | L50 - high<br>NW slope          | white ashy-to-<br>sandy deposits                     | -    | 14-Jun-16 | Alunite, Alum-(Na),<br>Minamite?, Amorphous            | nd | - |
| <b>P L50 yellow/6-16</b> | Pisciarelli | L50 - high<br>NW slope          | yellow ashy-to-<br>sandy deposits                    | -    | 14-Jun-16 | Alunite, Coquimbite?,<br>Amorphous                     | nd | - |
| <b>P L50 black/6-16</b>  | Pisciarelli | L50 - high<br>NW slope          | black ashy-to-<br>sandy deposits                     | -    | 14-Jun-16 | Jarosite, Alunite,<br>Gypsum, Amorphous                | nd | - |
| <b>P L20 Nnv/6-16</b>    | Pisciarelli | L20 - wall N<br>of new<br>vents | -                                                    | 94   | 14-Jun-16 | -                                                      | nd | - |
| <b>PS/6-16</b>           | Solfatara   | Mud pool                        | mud                                                  | 52.9 | 14-Jun-16 | Sulfur, Alunite,<br>Anorthoclase,<br>Amorphous         | nd | - |
| <b>BG S/6-16</b>         | Solfatara   | Bocca<br>Grande                 | S cream-like                                         | 93.2 | 14-Jun-16 | Sulfur                                                 | nd | - |
| <b>up BG S/6-16</b>      | Solfatara   | BG-nearby<br>area               | crystalline sulfur                                   | 93.2 | 14-Jun-16 | Sulfur                                                 | nd | - |
| <b>buco a/6-16</b>       | Solfatara   | BUCO                            | orange portion<br>into the hole                      | -    | 14-Jun-16 | Sulfur(new type-cif),<br>Ammonium Hydrogen<br>Arsenate | nd | - |
| <b>SMO ASA/6-16</b>      | Solfatara   | SMO                             | white, Monte<br>Olibano                              | 87   | 14-Jun-16 | Sulfur, Alunite,<br>Amorphous                          | nd | - |
| <b>SMO S/6-16</b>        | Solfatara   | SMO                             | fine yellow,<br>Monte Olibano                        | 87   | 14-Jun-16 | Sulfur                                                 | nd | - |
| <b>ASA m/16-6</b>        | Solfatara   | ASA                             | white on the NE-<br>slope,<br>intermediate<br>height | -    | 14-Jun-16 | Sulfur, Pyrite, Amorphous                              | nd | - |
| <b>ASA h/16-6</b>        | Solfatara   | ASA                             | white on the NE-<br>slope, uppermost<br>height       | -    | 14-Jun-16 | Sulfur, Alunite, <b>Cu-<br/>mineral?</b> , Amorphous   | nd | - |
| <b>SS/16-6</b>           | Solfatara   | SSt - NE-low                    | sulfur                                               | -    | 14-Jun-16 | Sulfur                                                 | nd | - |
| <b>SSt Sf/16-6</b>       | Solfatara   | SSt- Stuff                      | Sulfur in fracture                                   | 92   | 14-Jun-16 | Sulfur                                                 | nd | - |
| <b>SSt Sp/16-6</b>       | Solfatara   | SSt- Stuff                      | Sulfur as fluff                                      | 92   | 14-Jun-16 | Sulfur                                                 | nd | - |

|                      |             |                          |                                                                        |       |           |                                                            |    |   |
|----------------------|-------------|--------------------------|------------------------------------------------------------------------|-------|-----------|------------------------------------------------------------|----|---|
| <b>SSt w/16-6</b>    | Solfatara   | SSt- Stuff               | white                                                                  | 45    | 14-Jun-16 | Alunogen, Clay                                             | nd | - |
| <b>SSt sub/16-6</b>  | Solfatara   | SSt- Stuff               | substratum of sulfur                                                   | 92    | 14-Jun-16 | Periclase(MgO), Alunite, Quartz, Amorphous                 | nd | - |
| <b>SSt win/16-6</b>  | Solfatara   | SSt- Stuff               | efflorescence within Stuff                                             | -     | 14-Jun-16 | Rostite Al (SO4) (OH) ·5H2O, Sb-sulfide, Quartz, Amorphous | nd | - |
|                      |             |                          |                                                                        |       |           |                                                            |    |   |
| <b>Ps 7-16*</b>      | Pisciarelli | L3 - mud pool            | mud                                                                    | -     | 28-Jul-16 | Sulfates plus Sulfur, clay, Amorphous                      | nd | - |
| <b>PL 20V1 7-16*</b> | Pisciarelli | L20                      | gray argilla                                                           | -     | 28-Jul-16 | SO4 (mascagnite), few clay, Amorphous                      | nd | - |
|                      |             |                          |                                                                        |       |           |                                                            |    |   |
| <b>L3-2</b>          | Pisciarelli | L3 - vent neaby mud pool | efflorescence                                                          | -     | 20-Sep-16 | Alunite, Sulfur K-Feldspar, Amorphous, Pyrite, Coquimbite  | nd | - |
| <b>L1-7</b>          | Pisciarelli | L1 vent                  | efflorescence                                                          | -     | 20-Sep-16 | Alunite, Sulfur, Pyrite, Quartz, Amorphous                 | nd | - |
| <b>L1-6</b>          | Pisciarelli | L1 vent                  | efflorescence                                                          | >95   | 20-Sep-16 | Sulfur, Quartz, Amorphous                                  | nd | - |
| <b>S BG</b>          | Solfatara   | Bocca Grande             | Yellowish sulfur impregnating widely covers the greenish efflorescence | -     | 20-Sep-16 | Sulfur, Quartz, Amorphous                                  | nd | - |
| <b>L3-2</b>          | Pisciarelli | L3 - vent neaby mud pool | Gray portion                                                           | 84.4  | 20-Sep-16 | Alunite, Sulfur, K-Feldspar, Amorphous                     | nd | - |
| <b>Smudbag</b>       | Solfatara   | Mud pool                 | Beidge mud                                                             | -     | 20-Sep-16 | Alunite, Sulfur, K-Feldspar, Amorphous                     | nd | - |
| <b>Smudtube</b>      | Solfatara   | Mud pool                 | Beidge mud                                                             | 50.4  | 20-Sep-16 | Alunite, Sulfur, K-Feldspar, Amorphous                     | nd | - |
| <b>Smud box</b>      | Solfatara   | Mud pool                 | Beidge mud                                                             | 35-43 | 20-Sep-16 | Alunite, Sulfur, K-Feldspar, Amorphous                     | nd | - |
| <b>MP 09/16</b>      | Pisciarelli | L3 - Mud pool            | Beidge mud                                                             | -     | 20-Sep-16 | Alunite, Sulfur, K-Feldspar, Pyrite, Amorphous             | nd | - |

|                      |             |                            |                               |      |           |                                                                                                |    |   |
|----------------------|-------------|----------------------------|-------------------------------|------|-----------|------------------------------------------------------------------------------------------------|----|---|
| <b>L1-3 greenish</b> | Pisciarelli | L1 vent                    | greenish efflorescence        | 29.8 | 20-Sep-16 | -                                                                                              | nd | - |
| <b>MP/2-17</b>       | Pisciarelli | L3 - Mud pool              | gray mud                      | -    | 03-Feb-17 | Alunite, Sulfur, K-Feldspar, Pyrite, Amorphous                                                 | nd | - |
| <b>L1-SP2-17</b>     | Pisciarelli | L1 vent                    | sulfur cream, very hot        | -    | 03-Feb-17 | Sulfur                                                                                         | nd | - |
| <b>L1-AP2-17</b>     | Pisciarelli | L1 vent                    | efflorescence                 | -    | 03-Feb-17 | Alunite, Alunogen                                                                              | nd | - |
| <b>L1-SP2-17 low</b> | Pisciarelli | L1 vent                    | sulfur acicular               | -    | 03-Feb-17 | Sulfur                                                                                         | nd | - |
| <b>L1-SP3-17</b>     | Pisciarelli | L1 vent in fracture        | Sulfur acicular efflorescence | -    | 03-Feb-17 | Sulfur                                                                                         | nd | - |
| <b>MP/04-17</b>      | Pisciarelli | L3 - Mud pool              | gray mud                      | -    | 06-Apr-17 | Alunite, Sulfur, K-Feldspar, Pyrite, Amorphous                                                 | nd | - |
| <b>MS/04-17</b>      | Solfatara   | Mud pool                   | Beidge mud                    | -    | 06-Apr-17 | Alunite, Sulfur, K-Feldspar, Amorphous                                                         | nd | - |
| <b>MPS 517 new</b>   | Solfatara   | Mud pool                   | grey mud                      | -    | 31-May-17 | Kaolinite?, Alunite, Sulfur, K-Feldspar, Amorphous (Mascagnite, Sulfur, mica in the surnatant) | nd | - |
| <b>Buco a/517</b>    | Solfatara   | BUCO                       | orange portion in the hole    | -    | 31-May-17 | Sulfur                                                                                         | nd | - |
| <b>L1-S517</b>       | Pisciarelli | L1 vent near green portion | efflorescence                 | -    | 31-May-17 | Sulfur                                                                                         | nd | - |
| <b>L1-S517 high</b>  | Pisciarelli | L1 vent                    | sulfur cream, very hot        | -    | 31-May-17 | Sulfur                                                                                         | nd | - |
| <b>BG S/517</b>      | Solfatara   | Bocca Grande               | sulfur                        | -    | 31-May-17 | Sulfur                                                                                         | nd | - |
| <b>MS/517</b>        | Solfatara   | Mud pool                   | Beije mud                     | -    | 31-May-17 | Sulfur, Alunite, Hydrobiotite, Amorphous                                                       | nd | - |



|                             |             |               |                                                              |      |           |                                                                   |    |   |
|-----------------------------|-------------|---------------|--------------------------------------------------------------|------|-----------|-------------------------------------------------------------------|----|---|
| <b>MP/2906-17</b>           | Pisciarelli | L3 - Mud pool | gray mud                                                     | -    | 29-Jun-17 | Alunite, Sulfur, K-Feldspar, Pyrite, Amorphous                    | nd | - |
| <b>MS/2906-17</b>           | Solfatara   | Mud pool      | Beije mud                                                    | -    | 29-Jun-17 | Sulfur, Alunite, Amorphous, Illite? bad XRD pattern               | nd | - |
| <b>MS new/2906-17</b>       | Solfatara   | Mud pool      | Beije mud                                                    | -    | 29-Jun-17 | Sulfur, Alunite, Alum-(Na), Kaolinite?, Amorphous                 | nd | - |
| <b>L60 24/7/17</b>          | Pisciarelli | L60           | Sulfur at the level of the bubbling aquifer in a narrow hole | 83.6 | 24-Jul-17 | Sulfur                                                            | nd | - |
| <b>L3 24/7/17</b>           | Pisciarelli | L3 - mud pool | mud, central mud pool                                        | 76.1 | 24-Jul-17 | Sulfur, Gypsum, K-mascagnite                                      | nd | - |
| <b>L1 main 24/7/17</b>      | Pisciarelli | L1 vent       | Blackish with sulfur                                         | >92  | 24-Jul-17 | Sulfur, Pyrite                                                    | nd | - |
| <b>L20 new vent 24/7/17</b> | Pisciarelli | L20 high area | high area south of pool, blackish with S modified from gray  | >86  | 24-Jul-17 | Sulfur, Alunite, Gypsum                                           | nd | - |
| <b>L20 bombola</b>          | Pisciarelli | L20 high area | high area south of pool, whitish                             | 47   | 24-Jul-17 | Mascagnite, Illite, Amorphous                                     | nd | - |
| <b>PEXT</b>                 | Pisciarelli | PEXT          | yellowish crystalline Sulfur                                 | 95   | 24-Jul-17 | Sulfur (bad pattern)                                              | nd | - |
| <b>MS 24/7/17</b>           | Solfatara   | mud pool      | mud, mostly dried portion                                    | 48.1 | 24-Jul-17 | Sulfur, Alunite, Sanidine, Pyrite, low Amorphous                  | nd | - |
| <b>BG 24/7/17</b>           | Solfatara   | Bocca Grande  | Blackish with sulfur                                         | 92   | 24-Jul-17 | Sulfur, As species?                                               | nd | - |
| <b>MS new</b>               | Solfatara   | new pool      | liquid and oily mud                                          | -    | 24-Jul-17 | Minamiite, Alunite, K-Feldspar, Amorphous, Kaolinite? bad pattern | nd | - |
| <b>Buco 24/7/17</b>         | Solfatara   | BUCO          | orange portion in the hole                                   | -    | 24-Jul-17 | Sulfur, Amorphous. bad pattern                                    | nd | - |

|                                   |             |               |                                                            |           |           |                                     |    |   |
|-----------------------------------|-------------|---------------|------------------------------------------------------------|-----------|-----------|-------------------------------------|----|---|
| <b>MP viadotto 9/17</b>           | Pisciarelli | viadotto      | dried at the foot valley, mud at the inflow area           | 49.7      | 01-Sep-17 | Sulfur, Alunite                     | nd | - |
| <b>L3 9/17</b>                    | Pisciarelli | L3 - mud pool | mud from the bubbling point of the pool, drying            | 63.9-75.6 | 01-Sep-17 | -                                   | nd | - |
| <b>L1 wall2 zucch 9/17</b>        | Pisciarelli | L1 wall       | upper part, soft efflorescence                             | 45.1      | 01-Sep-17 | Alunogen (pattern slightly shifted) | nd | - |
| <b>L1 wall1 9/17</b>              | Pisciarelli | L1 wall       | between vent and wall 2, white massive with halos          | 43.7      | 01-Sep-17 | Sulfur, Alunogen                    | nd | - |
| <b>L1 vent 9/17</b>               | Pisciarelli | L1 vent       | blackish-brownish, low Sulfur                              | >85       | 01-Sep-17 | Sulfur, Alunite, Pyrite             | nd | - |
| <b>L1 wall 1S 9/17_sep bianco</b> | Pisciarelli | L1 wall       | sulfur at the wall base                                    | 77.5      | 01-Sep-17 | Sulfur, Alunogen                    | nd | - |
| <b>L1 wall 1S 9/17_sep S</b>      | Pisciarelli | L1 wall       | sulfur at the wall base                                    | 77.5      | 01-Sep-17 | Sulfur, Alunogen                    | nd | - |
| <b>L20 bombola 9/17</b>           | Pisciarelli | L20 high area | high area south of pool, low abundance of whitish material | 52.9      | 01-Sep-17 | Mascagnite, Alum-(K), Illite        | nd | - |
| <b>MS1 9/17</b>                   | Solfatara   | mud pool      | south portion, fine and mellow mud                         | 49.9-48.6 | 01-Sep-17 | Sulfur, Alunite                     | nd | - |
| <b>MP L3bocchetta 1.9.17</b>      | Pisciarelli | L3 - mud pool | mud from the bubbling point centre of the pool             | 49.9-48.6 | 01-Sep-17 | -                                   | nd | - |
| <b>MS2 9/17</b>                   | Solfatara   | mud pool      | north part, mud with acicular material and grains          | 49.9-48.6 | 01-Sep-17 | -                                   | nd | - |
| <b>MS3 9/17</b>                   | Solfatara   | mud pool      | Sulfur into the fracture determined by drying              | 49.9-48.6 | 01-Sep-17 | -                                   | nd | - |

|                                          |             |               |                                             |       |           |                                        |    |   |
|------------------------------------------|-------------|---------------|---------------------------------------------|-------|-----------|----------------------------------------|----|---|
| <b>BG 9/17</b>                           | Solfatara   | Bocca Grande  | Sulfur, abundant in mushy form              | >87.5 | 01-Sep-17 | Sulfur (shifted pattern)               | nd | - |
| <b>MS new 9/17</b>                       | Solfatara   | new pool      | level lowering, mushy mud that is drying    | 63-70 | 01-Sep-17 | Alunite, Pyrite, Alum-(Na), Amorphous  | nd | - |
| <b>L1 S</b>                              | Pisciarelli | L1 main vent  | -                                           | -     | 18-Sep-17 | Sulfur                                 | nd | - |
| <b>L1 efflorescenza beije_sep rosso</b>  | Pisciarelli | L1 main vent  | reddish from beije efflorescence            | -     | 18-Sep-17 | Alunogen (slightly shifted pattern)    | nd | - |
| <b>L1 efflorescenza beije_sep bianco</b> | Pisciarelli | L1 main vent  | white from the beije efflorescence          | -     | 18-Sep-17 | Alunogen                               | nd | - |
| <b>PINT S</b>                            | Pisciarelli | PINT          | Acicular Sulfur                             | -     | 18-Sep-17 | Sulfur                                 | nd | - |
| <b>L20 Camino</b>                        | Pisciarelli | L20 high area | Sulfur as a crust                           | -     | 18-Sep-17 | Sulfur, Alunite                        | nd | - |
| <b>L20 camino mud + S</b>                | Pisciarelli | L20 high area | Sulfur patina on gray clay                  | 94.2  | 18-Oct-17 | Alunite, Sulfur, Amorphous             | nd | - |
| <b>L20 camino mud + S_S</b>              | Pisciarelli | L20 high area | Sulfur patina on gray clay                  | 94.2  | 18-Oct-17 | Pyrite, Alunite, Sulfur, Amorphous     | nd | - |
| <b>L20 camino efflorescenza</b>          | Pisciarelli | L20 high area | grayish-to-whitish neogenesis               | 41.5  | 18-Oct-17 | Tschermigite                           | nd | - |
| <b>L20 camino S patina</b>               | Pisciarelli | L20 high area | Sulfur encrustation, patina                 | -     | 18-Oct-17 | Sulfur                                 | nd | - |
| <b>PINT rosso</b>                        | Pisciarelli | PINT          | red clay containing white rounded grain     | 90.5  | 18-Oct-17 | Alunite, Hematite, Kaolinite, Sanidine | nd | - |
| <b>PINT rosso_bianco</b>                 | Pisciarelli | PINT          | white rounded grain of the red clay above   | 90.5  | 18-Oct-17 | Alunite, Kaolinite                     | nd | - |
| <b>PINT S tozzo</b>                      | Pisciarelli | PINT          | Sulfur, blocky                              | 88.9  | 18-Oct-17 | Sulfur 01-078-1888                     | nd | - |
| <b>PINT rosso palline bianche</b>        | Pisciarelli | PINT          | white clay grains inside the red clay above | 90.5  | 18-Oct-17 | -                                      | nd | - |

|                                     |             |                      |                                                                |      |           |                                                                                               |    |                                 |
|-------------------------------------|-------------|----------------------|----------------------------------------------------------------|------|-----------|-----------------------------------------------------------------------------------------------|----|---------------------------------|
| <b>MP</b>                           | Pisciarelli | L3 - mud pool        | mud at the west border                                         | 88.7 | 18-Oct-17 | Alunite, Biotite, Montomorillonite, Clorite, Vermiculite, Pyrite, Sulfur, Sanidine, Amorphous | nd | -                               |
| <b>MP_mud decantato</b>             | Pisciarelli | L3 - mud pool        | mud decanted from water at the bubbling point                  | 84   | 18-Oct-17 | Alunite, Sulfur, Anorthoclase, Amorphous                                                      | nd | -                               |
| <b>MP_evapo dendritici</b>          | Pisciarelli | L3 - mud pool        | water at the centre, bubbling point, crystals from evaporation | 84   | 18-Oct-17 | Sulfur, Mascagnite, Alunite, Marialite, Oxybiotite, Amorphous                                 | nd | start water sampling from pools |
| <b>MP_evapo tozzi</b>               | Pisciarelli | L3 - mud pool        | water at the centre, bubbling point, crystals from evaporation | 84   | 18-Oct-17 | Ammonium sulfate (mascagnite), Bormuscovite, Sulfur, Paramelaconite (CuO)                     | nd | -                               |
| <b>L1 vent S cristallino</b>        | Pisciarelli | L1                   | Sulfur crystals from various point of the wall                 | -    | 18-Oct-17 | Sulfur (pattern 2283)                                                                         | nd | -                               |
| <b>L1 vent S cristallino_substr</b> | Pisciarelli | L1                   | substratum of the Sulfur                                       | -    | 18-Oct-17 | Sulfur, Alunite, Pyrite                                                                       | nd | -                               |
| <b>L1 vent S patina</b>             | Pisciarelli | L1 vent              | yellow patina                                                  | 95.2 | 18-Oct-17 | Sulfur                                                                                        | nd | -                               |
|                                     |             |                      |                                                                |      |           |                                                                                               |    |                                 |
| <b>L1 parete S</b>                  | Pisciarelli | L1 wall, base        | fine acicular crystals at the base                             | 89.6 | 15-Nov-17 | Sulfur                                                                                        | nd | -                               |
| <b>L1 pareteEFF</b>                 | Pisciarelli | L1 wall, upper part  | soft white efflorescence                                       | 34.5 | 15-Nov-17 | Alunogen, Alum-(K), Sulfur                                                                    | nd | -                               |
| <b>L1 pareteEFF_impurità</b>        | Pisciarelli | L1 wall, upper part  | soft whitish efflorescence                                     | 34.5 | 15-Nov-17 | Alunite (with Cr?), Alunogen                                                                  | nd | -                               |
| <b>L1 parete crosta</b>             | Pisciarelli | L1 wall, medial part | hard-to-friable white encrustation                             | 37   | 15-Nov-17 | Alum-(K), Alunite (likely with Cr?)                                                           | nd | -                               |
| <b>L30 mud</b>                      | Pisciarelli | L30                  | beige mud in a cm-wide hole filled by water                    | 41.7 | 15-Nov-17 | Alunite, Amorphous, bad pattern                                                               | nd | -                               |

|                                |             |               |                                                                  |      |           |                                                                        |    |   |
|--------------------------------|-------------|---------------|------------------------------------------------------------------|------|-----------|------------------------------------------------------------------------|----|---|
| <b>L3 acqua_decantata</b>      | Pisciarelli | L3 - mud pool | mud decanted from water at the bubbling point nearby L1          | 85   | 15-Nov-17 | Sulfur, Alunite, Mascagnite, Biotite, Amorphous                        | nd | - |
| <b>L3 acqua_evaporata</b>      | Pisciarelli | L3 - mud pool | water at the bubbling point nearby L1, crystals from evaporation | 85   | 15-Nov-17 | Mascagnite, Gypsum, Boromuscovite and other difficult to define        | nd | - |
| <b>L3 mud</b>                  | Pisciarelli | L3 - mud pool | mud, nearby PEXT                                                 | 87   | 15-Nov-17 | Alunite, Pirite, Feldspar, Sulfur, Illite, Amorphous, bad pattern      | nd | - |
| <b>L19 geiser</b>              | Pisciarelli | L19           | gray mud nearby geiser and fine flowing water                    | 90   | 15-Nov-17 | Alunite, Pyrite, high Amorphous content. bad pattern low crystallinity | nd | - |
| <b>L1 vent S_S</b>             | Piciarelli  | L1 vent       | sulfur at main fumarol                                           | 94.7 | 14-Dec-17 | Sulfur                                                                 | nd | - |
| <b>L1 vent S film_all</b>      | Piciarelli  | L1 vent       | substratum of sulfur main, fumarol                               | 94.7 | 14-Dec-17 | Sulfur, Pyrite, Alunite, Amorphous                                     | nd | - |
| <b>L20 camino S</b>            | Piciarelli  | L20           | Sulfur                                                           | 77.8 | 14-Dec-17 | Sulfur, Alunite, Amorphous                                             | nd | - |
| <b>L20 crema</b>               | Piciarelli  | L20           | Cream-like                                                       | -    | 14-Dec-17 | Alunite, Amorphous                                                     | nd | - |
| <b>L30 mud</b>                 | Piciarelli  | L30           | beije mud in a cm-wide hole filled by water                      | 42.1 | 14-Dec-17 | Alunite, Sulfur, Amorphous. bad pattern                                | nd | - |
| <b>L3 acqua_decantato</b>      | Piciarelli  | L3 - mud pool | mud decanted from water at the bubbling point nearby L1          | 84.5 | 14-Dec-17 | Sulfur, Alunite, Pyrite, Titanite, Amorphous                           | nd | - |
| <b>L3 acqua_cristallizzato</b> | Piciarelli  | L3 - mud pool | water at the bubbling point nearby L1, crystals from evaporation | 84.5 | 14-Dec-17 | Mascagnite, Tschermigite, Letovicite, Mohrite, Biotite                 | nd | - |
| <b>L3 mud MP</b>               | Piciarelli  | L3 - mud pool | mud, nearby PEXT                                                 | 77.4 | 14-Dec-17 | Pyrite, Sulfur, Alunite, Sanidine, Amorphous                           | nd | - |

|                                             |            |               |                                                             |      |           |                                                  |    |   |
|---------------------------------------------|------------|---------------|-------------------------------------------------------------|------|-----------|--------------------------------------------------|----|---|
| <b>L19 Geiser mud</b>                       | Piciarelli | L19           | mud, between Geisers                                        | -    | 14-Dec-17 | Alunite, Sulfur, Plagioclase, Amorphous          | nd | - |
| <b>L19 Geiser marrone_all crosta</b>        | Piciarelli | L19           | uppermost Geiser, bulk, brown crust                         | 95.3 | 14-Dec-17 | Alunite, Pyrite (greigite), Amorphous, Quartz?   | nd | - |
| <b>L19 Geiser marrone</b>                   | Piciarelli | L19           | uppermost Geiser, brown material from above sample          | 95.3 | 14-Dec-17 | Alunite, Sanidine, Phlogopite, Amorphous         | nd | - |
| <b>L19 Geiser crema_whole</b>               | Piciarelli | L19           | uppermost Geiser, cream-like, bulk                          | 95.3 | 14-Dec-17 | Alunite, Amorphous                               | nd | - |
| <b>L19 Geiser crema_imp bianco</b>          | Piciarelli | L19           | uppermost Geiser, cream-like, whitish from the above sample | 95.3 | 14-Dec-17 | Pyrite, Alunite, Amorphous                       | nd | - |
| <b>Geiser bianco (anche un po' arancio)</b> | Piciarelli | Geiser        | Back wall, white wall toward L60,                           | -    | 14-Dec-17 | Alunite, Quartz, Amorphous                       | nd | - |
| <b>Geiser arancione</b>                     | Piciarelli | Geiser        | orange                                                      | -    | 14-Dec-17 | Jarosite, Alunite, Amorphous                     | nd | - |
| <b>Geiser rosso</b>                         | Piciarelli | Geiser        | nearby the main output, reddish                             | -    | 14-Dec-17 | Jarosite, Alunite, Fe-hydroxides                 | nd | - |
|                                             |            |               |                                                             |      |           |                                                  |    |   |
| <b>MP acqua polla =L3 acqua</b>             | Piciarelli | L3 - mud pool | grayish water, crystals from evaporation                    | 85.4 | 18-Jan-18 | Mascagnite, Letovicite                           | nd | - |
| <b>MP mud</b>                               | Piciarelli | L3 - mud pool | blackish mud                                                | 77.1 | 18-Jan-18 | Alunite, Sulfur, Pyrite, Anorthoclase, Amorphous | nd | - |
| <b>L1 vent S</b>                            | Piciarelli | L1 vent       | crystallizing sulfur                                        | 94   | 18-Jan-18 | Sulfur, Pyrite                                   | nd | - |
| <b>L1 ventparete S</b>                      | Piciarelli | L1 wall       | diffuse crystalline sulfur on the wall nearby the vent      | 89.9 | 18-Jan-18 | Alunogen, Sulfur                                 | nd | - |
| <b>L1 parete verde</b>                      | Piciarelli | L1 wall       | greenish portions within whitish part                       | 72.5 | 18-Jan-18 | -                                                | nd | - |

|                                 |            |               |                                                                                              |      |           |                                                            |    |   |
|---------------------------------|------------|---------------|----------------------------------------------------------------------------------------------|------|-----------|------------------------------------------------------------|----|---|
| <b>PINT S_puro</b>              | Piciarelli | PINT          | Blocky and dendritic sulfur                                                                  | 93.4 | 18-Jan-18 | Sulfur                                                     | nd | - |
| <b>PINT S_bulk</b>              | Piciarelli | PINT          | Blocky and dendritic sulfur                                                                  | 93.4 | 18-Jan-18 | Sulfur                                                     | nd | - |
| <b>PINT rosa</b>                | Piciarelli | PINT          | pinkish material                                                                             | 93.4 | 18-Jan-18 | Feldspatoid? Very high abundance of Amorphous. bad pattern | nd | - |
| <b>L20 vent mud</b>             | Piciarelli | L20           | blackish-greenish mud on whitish material                                                    | 95.8 | 18-Jan-18 | Alunite, Pyrite, Amorphous                                 | nd | - |
| <b>L19 vent Geiser S</b>        | Piciarelli | L19 Geiser    | blackish-greenish mud on whitish material                                                    | 95.8 | 18-Jan-18 | -                                                          | nd | - |
| <b>L20 camino mud</b>           | Piciarelli | L20           | dried mud esfoliar                                                                           | 81   | 18-Jan-18 | Alunite, Amorphous                                         | nd | - |
| <b>L70 S</b>                    | Piciarelli | L70           | Sulfur on chimney at the base of the collapsed slope                                         | 68   | 18-Jan-18 | Sulfur                                                     | nd | - |
| <b>L70 eff</b>                  | Piciarelli | L70           | efflorescence uppermost on the wall source of L70S                                           | -    | 18-Jan-18 | Alunogen, Tschermingite, Amorphous                         | nd | - |
| <b>L60 Geiser acqua</b>         | Piciarelli | L60           | limpid water from bubbling aquifer into a hole back to the Geiser, crystals from evaporation | 93.6 | 18-Jan-18 | Tschermingite, Gypsum                                      | nd | - |
| <b>L60 Geiser S</b>             | Piciarelli | L60           | Sulfur within the hole above in which the aquifer is bubbling                                | -    | 18-Jan-18 | Sulfur                                                     | nd | - |
|                                 |            |               |                                                                                              |      |           |                                                            |    | - |
| <b>MP acqua polla =L3 acqua</b> | Piciarelli | L3 - mud pool | turbid, grayish water, crystals from evaporation                                             | 94.1 | 16-Feb-18 | Tschermigite, Mascagnite                                   | nd | - |

|                             |            |               |                                                         |      |           |                                                               |    |   |
|-----------------------------|------------|---------------|---------------------------------------------------------|------|-----------|---------------------------------------------------------------|----|---|
| <b>MP</b>                   | Piciarelli | L3 - mud pool | gray mud                                                | 74.1 | 16-Feb-18 | Alunite, Sulfur, Pyrite, orthoclase, Amorphous                | nd | - |
| <b>L30 fiori</b>            | Piciarelli | L30           | beije efflorescence nearby the cm-wide hole             | 40.7 | 16-Feb-18 | Alunogen, Quartz                                              | nd | - |
| <b>L30 eff1</b>             | Piciarelli | L30           | beije efflorescence on the wall nearby the cm-wide hole | 40.7 | 16-Feb-18 | Alunogen plus other but very complicated pattern              | nd | - |
| <b>L30 eff2</b>             | Piciarelli | L30           | beije efflorescence on the wall nearby the cm-wide hole | 40.7 | 16-Feb-18 | -                                                             | nd | - |
| <b>CIN1a1_grigio</b>        | Cinofilo   | CIN           | uppermost part, gray portion in the whitish material    | -    | 16-Feb-18 | Pyrite, Sulfur, Sanidine, Amorphous                           | nd | - |
| <b>CIN1a1_bianco</b>        | Cinofilo   | CIN           | uppermost part, whitish material                        | -    | 16-Feb-18 | Titanium oxide, Opal, Amorphous                               | nd | - |
| <b>CIN2 crema</b>           | Cinofilo   | CIN           | uppermost part, cream-like whitish material             | -    | 16-Feb-18 | Titanium oxide (Al), Opal, Amorphous                          | nd | - |
| <b>F1 CIN duro</b>          | Cinofilo   | CIN           | low hot site, hard encrustation                         | 96.2 | 16-Feb-18 | Alunogen, Zeolites, Sanidine.                                 | nd | - |
| <b>F1 CIN S</b>             | Cinofilo   | CIN           | low hot site, yellow sulfur                             | 96.2 | 16-Feb-18 | Sulfur                                                        | nd | - |
| <b>F1 CIN2 ara</b>          | Cinofilo   | CIN           | low hot site, orange concretion                         | 96.2 | 16-Feb-18 | Jarosite                                                      | nd | - |
| <b>CIN1 b eff arancione</b> | Cinofilo   | CIN           | low hot site, orange concretion, at the base            | 53.6 | 16-Feb-18 | Sanidine, Gypsum, Clay interlayer                             | nd | - |
| <b>CIN1 b eff bianca</b>    | Cinofilo   | CIN           | low hot site, orange concretion, at the top             | 53.6 | 16-Feb-18 | Tamarugite, Jarosite, Hexahydrate, Picroparmacolite, Zaherite | nd | - |



|                                 |            |                        |                                                                                               |      |           |                                                                                    |    |   |
|---------------------------------|------------|------------------------|-----------------------------------------------------------------------------------------------|------|-----------|------------------------------------------------------------------------------------|----|---|
| <b>MP acqua polla =L3 acqua</b> | Piciarelli | L3 - mud pool          | turbid, greenish water, crystals from evaporation                                             | 84.3 | 16-Mar-18 | Mascagnite, Tschermigite, Letovicite, Muscovite, Sulfur plus other but complicated | nd | - |
| <b>MP</b>                       | Piciarelli | L3 - mud pool          | gray mud                                                                                      | 84.3 | 16-Mar-18 | Alunite, Amorphous, Pyrite, Sanidine, Illite-Montmorillonite                       | nd | - |
| <b>PINT S</b>                   | Piciarelli | PINT                   | dendritic, encrusted sulfur                                                                   | 94.4 | 16-Mar-18 | Sulfur pure                                                                        | nd | - |
| <b>L60 acqua</b>                | Piciarelli | L60                    | clean water in the hole back to the Geiser, deepened aquifer level, crystals from evaporation | 92.2 | 16-Mar-18 | Alunogen, <b>Manganese thiocyanate</b> , <b>Akuammine</b> , Aluminium Sulfate      | nd | - |
| <b>L60 S</b>                    | Piciarelli | L60                    | Sulfur at the deepened aquifer level in the hole back to the Geiser above                     | 92.2 | 16-Mar-18 | Sulfur                                                                             | nd | - |
| <b>L60 S_bianco</b>             | Piciarelli | L60                    | white portion at the deepened aquifer level in the hole back to the Geiser above              | 92.2 | 16-Mar-18 | Amorphous, Alunite, Sulfur                                                         | nd | - |
| <b>L20 rugine_bianco</b>        | Piciarelli | L20                    | orange-reddish portion on whitish substratum                                                  | -    | 16-Mar-18 | Alunite, Amorphous, Pyrite, Illite/Montmorillonite                                 | nd | - |
| <b>L20 rugine_rosa</b>          | Piciarelli | parte alta a sud polla | orange-to-reddish portions of previous sample                                                 | -    | 16-Mar-18 | Amorphous, Alunite, Montmorillonite                                                | nd | - |
| <b>L19 vent N S</b>             | Piciarelli | L19                    | substratum for S, south of L60                                                                | -    | 16-Mar-18 | Sulfur, low abundant Alunite                                                       | nd | - |

|                               |             |                    |                                                                   |      |           |                                              |    |   |
|-------------------------------|-------------|--------------------|-------------------------------------------------------------------|------|-----------|----------------------------------------------|----|---|
| <b>L19 vent N S_substrato</b> | Piciarelli  | L19                | substratum for S, south of L60                                    | -    | 16-Mar-18 | Sulfur, Amorphous, Alunite, Feldspar         | nd | - |
| <b>Cam Caliro</b>             | Piciarelli  | Geiser             | acicular whitish crystals forming an efflorescence at the surface | -    | 01-Apr-18 | Alunogen                                     | nd | - |
| <b>MP</b>                     | Piciarelli  | L3 - mud pool      | gray mud                                                          | 84.6 | 22-May-18 | Alunite, Sanidine, Pyrite, Sulfur, Amorphous | nd | - |
| <b>Viadotto</b>               | Piciarelli  | Viadotto           | gray, stratified mud                                              | 40.8 | 22-May-18 | Alunite, Sanidine, Pyrite, Sulfur, Amorphous | nd | - |
| <b>L30 mud</b>                | Piciarelli  | L30                | beije, humid mud in a cm-wide hole                                | 71   | 22-May-18 | Alunite, Amorphous                           | nd | - |
| <b>L1 vent S</b>              | Pisciarelli | L1 vent            | low abundance of Sulfur on the blackish substratum                | 95.1 | 22-May-18 | Sulfur                                       | nd | - |
| <b>PINT S</b>                 | Piciarelli  | PINT               | dendritic encrustated sulfur                                      | 94.8 | 22-May-18 | Sulfur                                       | nd | - |
| <b>L20 new vent mud</b>       | Piciarelli  | L20                | gray mud around the vent, reddish at the surface                  | 94.9 | 22-May-18 | Alunite, Pyrite, Clay                        | nd | - |
| <b>L20 eff beije</b>          | Piciarelli  | L20, on the east   | beije efflorescence, flower-like                                  | -    | 22-May-18 | Alum-(Na), Letovicite                        | nd | - |
| <b>L20 eff bianca</b>         | Piciarelli  | L20, on the east   | white efflorescence, flower-like                                  | -    | 22-May-18 | Tamarugite, Feldspar                         | nd | - |
| <b>L19 N vent S</b>           | Piciarelli  | L19                | sulfur on greenish-whitish wall                                   | -    | 22-May-18 | Sulfur                                       | nd | - |
| <b>L60 S</b>                  | Piciarelli  | a monte del Geiser | Sulfur at the water level of the hole above                       | 93.9 | 22-May-18 | Sulfur                                       | nd | - |

|                                             |             |                         |                                                       |      |           |                                              |    |   |
|---------------------------------------------|-------------|-------------------------|-------------------------------------------------------|------|-----------|----------------------------------------------|----|---|
| <b>Geiser ara</b>                           | Piciarelli  | intorno al Geiser       | orange exfoliating encrustation                       |      | 22-May-18 | Tschermigite, Jarosite, Amorphous            | nd | - |
| <b>MP</b>                                   | Piciarelli  | L3 - mud pool           | blackish mud                                          | 83.8 | 26-Jun-18 | Alunite, Sanidine, Pyrite, Sulfur, Amorphous | nd | - |
| <b>MP acqua polla =L3 acqua</b>             | Piciarelli  | L3 - mud pool           | blackish turbid water, crystals from evaporation      | 83.8 | 26-Jun-18 | Mascagnite, Gypsum, Zeolites                 | nd | - |
| <b>MP acqua polla =L3 acqua con residuo</b> | Piciarelli  | L3 - mud pool           | blackish turbid water, crystals from evaporation      | 83.8 | 26-Jun-18 | Mascagnite, Gypsum, Zeolites                 | nd | - |
| <b>L1-L3 eff suolo</b>                      | Piciarelli  | between pool and L1     | orange efflorescence at the soil                      | -    | 26-Jun-18 | Mascagnite, Zeolite, Letovicite              | nd | - |
| <b>L30 eff</b>                              | Piciarelli  | L30, nearby hole        | whitish flower-like efflorescence newby greenish part | -    | 26-Jun-18 | Alunogen, Fe-phosphate? and/or Jarosite      | nd | - |
| <b>L30 eff_blocchetto</b>                   | Piciarelli  | L30, nearby hole        | white flower on the greenish portions                 | -    | 26-Jun-18 | Alunite, Alunogen                            | nd | - |
| <b>L30-L1 eff</b>                           | Pisciarelli | between L30 and L1      | soft, whitish                                         | -    | 26-Jun-18 | Alunogen, Chabazite                          | nd | - |
| <b>L100 base</b>                            | Piciarelli  | L100, south west of L60 | dried mushy efflorescence, at the base of the wall    | -    | 26-Jun-18 | Alunite, Alunogen                            | nd | - |
| <b>L100 granu</b>                           | Piciarelli  | L100, south west of L60 | dried granular efflorescence, medial on the wall      | -    | 26-Jun-18 | Alunite, Alunogen                            | nd | - |
| <b>L100 eff</b>                             | Piciarelli  | L100, south west of L60 | friable encrustation on the granular efflorescence    | -    | 26-Jun-18 | Alunite, Alunogen                            | nd | - |

|                                 |             |                                   |                                                                  |      |           |                                                       |         |   |
|---------------------------------|-------------|-----------------------------------|------------------------------------------------------------------|------|-----------|-------------------------------------------------------|---------|---|
| <b>L100 zucc</b>                | Piciarelli  | L100, south west of L60           | sugar-like efflorescence, topmost                                | -    | 26-Jun-18 | Alunogen                                              | nd      | - |
| <b>MP</b>                       | Piciarelli  | L3 - mud pool                     | mud                                                              | 81.6 | 18-Jul-18 | Alunite, Sanidine, Pyrite, Sulfur, Biotite, Amorphous | nd      | - |
| <b>MP acqua polla =L3 acqua</b> | Piciarelli  | L3 - mud pool                     | water, crystals from evaporation                                 | 81.6 | 18-Jul-18 | Mascagnite, Sulfur, Biotite                           | nd      | - |
| <b>L3 schiuma</b>               | Piciarelli  | L3 - mud pool                     | foam at the pool limit                                           | 81.6 | 18-Jul-18 | Sulfur, Alunite, Mascagnite                           | nd      | - |
| <b>L1S</b>                      | Piciarelli  | L1 parete                         | low abundant sulfur                                              | -    | 18-Jul-18 | Sulfur                                                | nd      | - |
| <b>L71S</b>                     | Piciarelli  | L71                               | low abundant sulfur along the collapsed and mined wall           | 94.1 | 18-Jul-18 | Sulfur                                                | nd      | - |
| <b>PEXT S</b>                   | Piciarelli  | PEXT                              | dendritic hair-like sulfur                                       | 94.6 | 18-Jul-18 | Sulfur                                                | nd      | - |
| <b>PINT S</b>                   | Piciarelli  | PINT                              | dendritic hair-like encrustation of sulfur                       | 95   | 18-Jul-18 | Sulfur                                                | nd      | - |
| <b>L20M ara</b>                 | Pisciarelli | top L20                           | orange wall along the uppermost pathway                          | -    | 18-Jul-18 | Tschermigite, Illite/Montmorillonite                  | nd      | - |
| <b>L60 S</b>                    | Piciarelli  | L60                               | deepening water level in the hole back to Geiser                 | -    | 18-Jul-18 | Sulfur                                                | nd      | - |
| <b>L60b acqua</b>               | Piciarelli  | L60 other                         | bubbling water between L60 and geiser, crystals from evaporation | -    | 18-Jul-18 | any crystallization                                   | nd      | - |
| <b>MP-viadotto</b>              | Piciarelli  | between L1, viadotto, pool border | mushy blackish mud                                               | 55.3 | 26-Sep-18 | Alunite, Sulfur                                       | 3.9-4.5 | - |

|                       |            |               |                                                    |      |           |                                                       |     |   |
|-----------------------|------------|---------------|----------------------------------------------------|------|-----------|-------------------------------------------------------|-----|---|
| <b>L3 acqua</b>       | Piciarelli | L3 - mud pool | water nearby PEXT, crystals from evaporation       | 94.3 | 26-Sep-18 | Illite/Montmorillonite, Ammonium K sulfate            | 4.8 | - |
| <b>MP-L3</b>          | Piciarelli | L3 - mud pool | black, granular mud                                | 94.3 | 26-Sep-18 | Alunite, Sanidine, Pyrite, Sulfur, Biotite, Amorphous | 4.8 | - |
| <b>L3 Geiser</b>      | Piciarelli | L3 - mud pool | water nearby the Geiser, crystals from evaporation | 80.1 | 26-Sep-18 | Mascagnite, Biotite, Sulfur                           | 5.2 | - |
| <b>L60 S</b>          | Piciarelli | L60           | deepening water level in the hole back to Geiser   | 93.9 | 26-Sep-18 | Sulfur                                                | 1.6 | - |
| <b>L60 acqua</b>      | Piciarelli | L60 other     | bubbling water                                     | 93.9 | 26-Sep-18 | -                                                     | 1.6 | - |
| <b>L1vent nero</b>    | Piciarelli | L1 vent       | low abundant sulfur                                | 95.8 | 26-Sep-18 | Voltaite, Coquimbite, Pyrite                          | 1.3 | - |
| <b>L1 base S</b>      | Piciarelli | L1            | yellow sulfur at the wall base                     | -    | 26-Sep-18 | Sulfur                                                | nd  | - |
| <b>L1 parete S</b>    | Piciarelli | L1            | pale yellow sulfur along the wall                  | -    | 26-Sep-18 | Sulfur                                                | nd  | - |
| <b>L1 bianco zucc</b> | Piciarelli | L1            | sugar-like along the wall                          | -    | 26-Sep-18 | Alunogen, Alum-(K)                                    | nd  | - |
| <b>PINT S</b>         | Piciarelli | PINT          | dendritic, encrustated, hair-like sulfur           | 89.1 | 26-Sep-18 | Sulfur                                                | nd  | - |
| <b>BG</b>             | Solfatara  | Bocca Grande  | strong yellowish encrustation                      | -    | 26-Sep-18 | Ammonium chloride, Arsenic sulfide (Realgar)          | nd  | - |
| <b>BG</b>             | Solfatara  | Bocca Grande  | strong yellowish encrustation                      | -    | 26-Sep-18 | Ammonium chloride, Arsenic sulfide (Realgar)          | nd  | - |
| <b>BG</b>             | Solfatara  | Bocca Grande  | strong yellowish encrustation                      | -    | 26-Sep-18 | Ammonium chloride, Arsenic sulfide (Realgar)          | nd  | - |
| <b>L60b</b>           | Piciarelli | L60 other     | bubbling milky water, crystals from evaporation    | 94   | 30-Oct-18 | Potassium Ammonium Aluminum Sulfate Hydrate           | 1-2 | - |

|                     |            |                 |                                                                    |      |           |                                                       |      |   |
|---------------------|------------|-----------------|--------------------------------------------------------------------|------|-----------|-------------------------------------------------------|------|---|
| <b>L60</b>          | Piciarelli | L60 other       | milky water, deepened aquifer level, crystals from evaporation     | 91.8 | 30-Oct-18 | no sample                                             | 1-2  | - |
| <b>Fratturina</b>   | Piciarelli | between L30-L1  | collected spray from a cm-long fracture, crystals from evaporation | 95.6 | 30-Oct-18 | Mascagnite                                            | 7    | - |
| <b>MP</b>           | Piciarelli | L3 - mud pool   | gray-black mud with up to cm-sized components                      | 91.2 | 30-Oct-18 | Alunite, Sanidine, Pyrite, Sulfur, Biotite, Amorphous | 5    | - |
| <b>L3 acqua</b>     | Piciarelli | L3 - mud pool   | turbid water, crystals from evaporation                            | 90.5 | 30-Oct-18 | Mascagnite, Sulfur, Clay mineral                      | 5    | - |
| <b>L1 vent</b>      | Piciarelli | L1 vent         | gray-black without sulfur                                          | 95   | 30-Oct-18 | Pyrite, Alunite, Biotite                              | -    | - |
| <b>L1 S</b>         | Piciarelli | L1 base         | sulfur at the wall base                                            | -    | 30-Oct-18 | Sulfur                                                | -    | - |
| <b>MP viadotto</b>  | Piciarelli | viadotto        | mud with water abundance                                           | -    | 30-Oct-18 | Alunite, Sanidine, Sulfur, Amorphous                  | -    | - |
| <b>L20 camino</b>   | Piciarelli | L20             | gray mud                                                           | 91.8 | 30-Oct-18 | Alunite, Pyrite                                       | -    | - |
| <b>L19</b>          | Piciarelli | L19             | translucid black mud with orange and white crystals                | 94.8 | 30-Oct-18 | Pyrite, Alunite                                       | -    | - |
| <b>L100S</b>        | Piciarelli | L100            | sulfur                                                             | 92.6 | 30-Oct-18 | Sulfur                                                | -    | - |
| <b>L100 nero</b>    | Piciarelli | L100            | substratum of sulfur                                               | 92.6 | 30-Oct-18 | Sulfur, Quartz, Amorphous                             | -    | - |
| <b>L70</b>          | Piciarelli | L70             | black material with sulfur                                         | 93.3 | 30-Oct-18 | -                                                     | -    | - |
| <b>Stufe Pozzo1</b> | Baia       | Stufe di Nerone | water from well, crystals from evaporation                         | 76   | 31-Oct-18 | Halite                                                | 7.06 | - |

|                         |            |                                 |                                                                           |      |           |                                                         |   |   |
|-------------------------|------------|---------------------------------|---------------------------------------------------------------------------|------|-----------|---------------------------------------------------------|---|---|
| <b>Stufe spring</b>     | Baia       | Stufe di Nerone                 | water springs, crystals from evaporation                                  | 78.6 | 31-Oct-18 | Halite                                                  | 7 | - |
| <b>L60b acqua</b>       | Piciarelli | L60 other                       | bubbling milky water between L60 and geiser, crystals from evaporation    | 92.6 | 29-Nov-18 | Ammonium sulfite, Alum-(K)                              | - | - |
| <b>L60 mud</b>          | Piciarelli | L60 wall on the back            | plastered grayish mud                                                     | -    | 29-Nov-18 | Alunite, Orthoclase, Pyrite                             | - | - |
| <b>L3 acqua</b>         | Piciarelli | L3 - mud pool                   | milky grayish water, crystals from evaporation                            | 85.7 | 29-Nov-18 | Mascagnite, Koktaite (sulfate calcium ammonium hydrate) | - | - |
| <b>MP</b>               | Piciarelli | L3 - mud pool                   | mud with cm-sized components                                              | 85.7 | 29-Nov-18 | Alunite, Sulfur, Hydrobiotite, Orthoclase, Pyrite       | - | - |
| <b>PEXT S</b>           | Piciarelli | PEXT                            | S encrustation and crystals                                               | 93.7 | 29-Nov-18 | Sulfur                                                  | - | - |
| <b>L1 wext</b>          | Piciarelli | L1, external side, proxy to L30 | efflorescence and encrustation through a fracture of the white wall       | -    | 17-Jan-19 | Alunite, Alunogen                                       | - | - |
| <b>G19 fango ess</b>    | Piciarelli | G19, mud vent                   | dried gray-greenish mud from a vent opened nearby the Geiser and the pool | 91.5 | 17-Jan-19 | Alunite, Amorphous                                      | - | - |
| <b>G19 fango fluido</b> | Piciarelli | G19, mud vent                   | gray fluid mud coexisting with the above                                  | 91.5 | 17-Jan-19 | Alunite, Mascagnite, Amorphous.                         | - | - |
| <b>G19-S</b>            | Piciarelli | G19, mud vent                   | yellowish encrustation on the mud above                                   | 91.5 | 17-Jan-19 | Sulfur, Alunite                                         | - | - |

|                             |            |               |                                                                 |      |           |                                                   |   |   |
|-----------------------------|------------|---------------|-----------------------------------------------------------------|------|-----------|---------------------------------------------------|---|---|
| <b>G19_ara</b>              | Piciarelli | G19, mud vent | brow-orange encrustation on the mud above                       | 91.5 | 17-Jan-19 | Clairite, Mohrite                                 | - | - |
| <b>G19_eff bianca</b>       | Piciarelli | G19, mud vent | whitish encrustation coexisting with the G19 materials above    | 91.5 | 17-Jan-19 | Alunite, Jarosite?, Amorphous                     | - | - |
| <b>MP</b>                   | Piciarelli | L3 - mud pool | decanted mud sample from the east side of the pool              | 88.6 | 17-Jan-19 | Alunite, Sulfur, Pyrite, Orthoclase.              | - | - |
| <b>L3</b>                   | Piciarelli | L3 - mud pool | water from the east side of the pool, crystals from evaporation | 88.6 | 17-Jan-19 | Mascagnite, Gypsum, Koktaite.                     | - | - |
| <b>PEXT_S</b>               | Piciarelli | PEXT          | sulfur                                                          | 94.6 | 17-Jan-19 | Sulfur                                            | - | - |
| <b>G19_aranew</b>           | Piciarelli | G19, mud vent | orange-brownish encrustation                                    | 84.1 | 24-Jan-19 | Mascagnite, alunogen, Zaherite, Amorphous.        | - | - |
| <b>G19_red</b>              | Piciarelli | G19, mud vent | reddish encrustation                                            | 84.1 | 24-Jan-19 | Titanium oxide, Amorphous.                        | - | - |
| <b>L100 ara</b>             | Piciarelli | L100          | orange-brownish encrustation, southeast L60                     | -    | 24-Jan-19 | Alunogen, Voltaite, Coquimbite, Zaherite, Gypsum. | - | - |
| <b>L60-polla1</b>           | Piciarelli | L60           | whitish substratum for algae, wall of the hole, top part        | 40   | 06-Feb-19 | Alunite, Amorphous.                               | - | - |
| <b>L60-polla2</b>           | Piciarelli | L60           | whitish substratum for algae, wall of the hole, lowermost part  | 40   | 06-Feb-19 | Natroalunite, Silicon Oxide, Amorphous.           | - | - |
| <b>L1wall incrostazione</b> | Piciarelli | L1 wall       | fissure with algae on which granular                            | 34   | 06-Feb-19 | Alum-(K)                                          | - | - |



|                              |            |               |                                                               |    |           |                                                                  |   |   |
|------------------------------|------------|---------------|---------------------------------------------------------------|----|-----------|------------------------------------------------------------------|---|---|
|                              |            |               | encrustation occurs                                           |    |           |                                                                  |   |   |
| <b>PEXT_parte verde</b>      | Piciarelli | PEXT          | brownish film on whitish substratum with algae, greenish part | 34 | 06-Feb-19 | Potassium Ammonium Aluminum Sulfate Hydrate, Alunite, Amorphous. | - | - |
| <b>PEXT_parte marroncina</b> | Piciarelli | PEXT          | brownish film on whitish substratum with algae, brown part    | 34 | 06-Feb-19 | Alunite, Sulfur, Amorphous.                                      | - | - |
| <b>PEXT_parte biancastra</b> | Piciarelli | PEXT          | brownish film on whitish substratum with algae, white part    | 34 | 06-Feb-19 | Alunite, Amorphous.                                              | - | - |
| <b>MP</b>                    | Piciarelli | L3 - mud pool | mud decanted water, east side of the pool                     | 88 | 06-Feb-19 | Alunite, Sulfur, Pyrite, Orthoclase, Amorphous.                  | - | - |
| <b>L3</b>                    | Piciarelli | L3 - mud pool | water, east side of the pool, crystals from evaporation       | 88 | 06-Feb-19 | Mascagnite, Clay mineral                                         | - | - |
| <b>G19</b>                   | Piciarelli | G19, mud vent | encrustation                                                  | -  | 06-Feb-19 | Alunite, Mascagnite, Voltaite, Zaherite, Amorphous.              | - | - |
|                              |            |               |                                                               |    |           |                                                                  |   |   |

Table S2 – Vibration modes and related tentative assignment of functional groups, and mineral attribution for selected samples by DRIFT-FTIR investigations. Alu = alunite, Clay = illite/montmorillonite, Masc = NH<sub>4</sub> - bearing sulfates, am = amorphous, Kao = kaolinite, KAl = alum - (K). ?, uncertain attribution.

| SOLFATARA MUDDS |         |        |                                 |           | PISCIARELLI MUDDS |          |          |  |  |
|-----------------|---------|--------|---------------------------------|-----------|-------------------|----------|----------|--|--|
| 5/6/16          | 24/7/17 | 1/9/17 | Tentative Assignment            | PH        | 6/16              | 15/11/17 | 14/12/17 |  |  |
| 4603            | 4606    | h      | Al-OH                           | Alu       | 4608h             | -        | 4593h    |  |  |
| 4529            | 4528    | x      | Al-OH                           |           | 4518x             | -        | -        |  |  |
| -               | 4311    | x      | Mg-OH                           | Clay?     | -                 | -        | -        |  |  |
| 3973x           | 3975p   | 3980x  |                                 | Alu       | 3971x             | 3976x    | 3973x    |  |  |
| -               | -       | -      |                                 | Clay      | 3629              | 3622     | 3622     |  |  |
| -               | 3692p   | -      |                                 |           | -                 | -        | -        |  |  |
| 3587h           | 3620x   | h      | v1OH?                           | Clay?     | -                 | -        | -        |  |  |
| 3505p           | 3506p   | 3506p  | v1OH                            | Alu       | 3506p             | 3510p    | 3512p    |  |  |
| 3486p           | 3486p   | 3484p  | v1OH                            | Alu       | 3483p             | 3486p    | 3486p    |  |  |
| 3284h           | 3318h   | 3275h  | v1OH?                           | Clay?     | 3268h             | -        | -        |  |  |
| -               | -       | -      |                                 |           | -                 | 3333h    | 3322h    |  |  |
| 2338p           | 2339p   | 2337p  |                                 |           | 2340p             | 2338p    | 2338p    |  |  |
| 2287            | 2291x   | 2289x  | 2v <sub>3</sub> SO <sub>4</sub> | Alu       | 2285              | -        | -        |  |  |
| -               | -       | -      |                                 |           | -                 | 2289     | -        |  |  |
| 2220            | 2223x   | x      | 2v <sub>3</sub> SO <sub>4</sub> | Alu       | 2225h             | -        | -        |  |  |
| 2176p           | 2176p   | 2176p  | 2v <sub>3</sub> SO <sub>4</sub> | Alu       | 2175x             | 2178x    | 2176x    |  |  |
| 2119p           | 2117p   | 2116p  | 2v <sub>3</sub> SO <sub>4</sub> | Alu       | 2112p             | 2118x    | 2117x    |  |  |
| 1990p           | 1981x   | 1988p  |                                 | Opal?     | 1997h             | 1985h    | 1980h    |  |  |
| 1870p           | 1872p   | 1873p  |                                 | Opal?     | 1868p             | 1870p    | 1869p    |  |  |
| 1635p           | 1629p   | 1628p  | δHOH                            |           | 1630p             | 1637p    | 1629p    |  |  |
| 1436x           | 1431p   | 1432x  | v <sub>4</sub> NH <sub>4</sub>  | Masc?     | 1431-00           | 1437p    | 1434p    |  |  |
| 1215            | 1219x   | 1215h  | Si-O                            | Clay, am? | 1216x             | 1216     | 1219     |  |  |
| 1159            | 1158x   | 1158x  |                                 |           | 1158              | -        | 1156     |  |  |
| 1102p           | 1101p   | 1102p  | v <sub>3</sub> SO <sub>4</sub>  | Alu       | 1095p             | 1099p    | 1099p    |  |  |
| 1027p           | 1028p   | 1028p  | v <sub>1</sub> SO <sub>4</sub>  | Alu       | 1027p             | 1028p    | 1028p    |  |  |
| 949p            | 943p    | 947p   | AIAIOH                          | Clay?     | -                 | -        | -        |  |  |
| -               | -       | -      | AIAIOH                          | Clay?     | 929h              | 934h     | 936h     |  |  |
| -               | 871p    | -      |                                 |           | -                 | -        | -        |  |  |

  

| SOLFATARA NEW HOLE |            |            |                                                   |           |
|--------------------|------------|------------|---------------------------------------------------|-----------|
| MSnew 5/17         | MSnew 7/17 | MSnew 9/17 | Tentative assignment                              | Phase     |
| 4605x              | 4608       | 4613x+4586 | Al-OH                                             | Alu       |
| 4523p              | 4525x      | 4525p      | Al-OH                                             | Kao       |
| 4308?              | 4307?      | 4307x      | Mg-OH                                             | -         |
| 3976p              | 3980p      | 3976p      |                                                   | Alu       |
| 3694p              | 3695p      | 3695p      | v1OH                                              | Kao       |
| 3668p              | 3666p      | 3667p      | v1OH                                              | Kao       |
| 3652p              | 3651p      | 3651p      | v1OH                                              | Kao       |
| 3620p              | 3620p      | 3620p      | v1OH                                              | Kao       |
| 3510x              | 3510p      | 3509x      | v1OH                                              | Alu       |
| 3483p              | 3483p      | 3483p      | v1OH                                              | Alu       |
| 3354x              | -          | -          | vOH                                               | KAl       |
| 3006x              | -          | -          | vOH                                               | KAl       |
| 3410-2650H         | 3418-2650H | 3410-2650H | vOH                                               | -         |
| 2460h              | -          | -          | vOH                                               | KAl       |
| 2338x              | 2338p      | 2338x      | -                                                 | -         |
| 2290x              | 2291p      | 2288x      | 2v <sub>3</sub> SO <sub>4</sub>                   | Alu       |
| 2221x              | 2228x      | 2222x      | 2v <sub>3</sub> SO <sub>4</sub>                   | Alu       |
| 2176x              | 2177p      | 2176x      | 2v <sub>3</sub> SO <sub>4</sub>                   | Alu       |
| 2115x              | 2115p      | 2116x      | 2v <sub>3</sub> SO <sub>4</sub>                   | Alu       |
| 1994hx             | 1995hx     | 1991hx     |                                                   | Opal?     |
| 1875p              | 1870p      | 1874p      |                                                   | Opal?     |
| 1630p              | 1637p      | 1631p      | δHOH                                              |           |
| 1435p              | 1431p      | 1431p      | v <sub>4</sub> NH <sub>4</sub>                    | Masc?     |
| 1228p              | 1229p      | 1231p      | v <sub>3</sub> OH+ v <sub>3</sub> SO <sub>4</sub> | Alu, KAl  |
| 1156x              | 1158x      | 1158x      |                                                   |           |
| 1095p              | 1097p      | 1092p      | v <sub>3</sub> SO <sub>4</sub>                    | Alu, KAl  |
| 1026p              | 1029p      | 1028p      | v <sub>1</sub> SO <sub>4</sub> , Si-O             | Alu, Kao  |
| 1008x              | 1010x      | 1012x      | Si-O                                              | Opal? Kao |

|      |      |      |                                |          |      |      |      |
|------|------|------|--------------------------------|----------|------|------|------|
| -    | 850p | -    |                                | S?       | -    | -    | -    |
| 798p | 801h | 801p | SiO                            | am, clay | 796p | 796p | 793p |
| 682p | 685p | 686p | v <sub>4</sub> SO <sub>4</sub> | Alu      | 680p | 684p | 683p |
| 634p | 636p | 632p | v <sub>4</sub> SO <sub>4</sub> | Alu      | 634p | 631p | 629p |
| 604p | 602p | 604p | γOH                            | Clay     | 601p | 603p | 602p |
| -    | 576x | -    |                                |          |      |      |      |
| 526x | 526  | 527p | Al-O-Si                        | Clay     | -    | 524  | 526  |
| 470x | 469p | 467p | Si-O-Si                        | S? Clay? | -    | 469  | 470  |
| -    | -    | -    |                                |          | -    | -    | -    |

|      |         |          |                                      |              |
|------|---------|----------|--------------------------------------|--------------|
| 938x | 939p    | 938x     | OH                                   | Kao          |
| 912p | 916p    | 915p     | OH                                   | Kao          |
| 795p | 794p    | 795p     | Si-O                                 | Opal? Kao    |
| 685p | 688p    | 684p     | Al-O, v <sub>4</sub> SO <sub>4</sub> | Kao, Al, KAl |
| 631p | 635p    | 631p     | Si-O, v <sub>4</sub> SO <sub>4</sub> | Kao, Al      |
| 601p | 604p    | 601p     | δOH                                  | Kao          |
| 532p | 546-529 | 540p     | Al-O-Si                              | Kao, clay    |
| 474p | 473p    | 481-467p | Si-O-Si                              | Kao, clay    |
| 433p | 435p    | 432p     | Si-O                                 | Kao          |

Table S3 – Selected whole-rock geochemistry of multi-phases materials sampled at different locations (i.e., sample name as in Fig. 1) within the Pisciarelli and Solfatara areas and at different times. MDL indicates the detection limit for major, trace, C and S contents.

| Name                           | Method | MDL     | MPS0517 | MP      | MSnew   | MS      | L20camino | L1 beije | MS new | MS2    | MP       | L19Geiser | BG      | L3 MP    |
|--------------------------------|--------|---------|---------|---------|---------|---------|-----------|----------|--------|--------|----------|-----------|---------|----------|
| Sampling Date                  |        |         | 31.5.17 | 29.6.17 | 29.6.17 | 29.6.17 | 18.9.17   | 18.9.17  | 1.9.17 | 1.9.17 | 15.11.17 | 14.12.17  | 20.9.16 | 14.12.14 |
| SiO <sub>2</sub>               | ICP-ES | 0.01%   | 49.43   | 38.05   | 49.27   | 49.59   | 15.73     | 3.09     | 48.71  | 72.52  | 59.78    | 63.33     | 80.56   | 56.32    |
| Al <sub>2</sub> O <sub>3</sub> | ICP-ES | 0.01%   | 16.2    | 10.01   | 16.04   | 4.97    | 2.35      | 14.67    | 16.72  | 3.43   | 10.38    | 11.32     | 1.29    | 11.85    |
| Fe <sub>2</sub> O <sub>3</sub> | ICP-ES | 0.04%   | 4.02    | 2.35    | 3.88    | 0.29    | 0.09      | 3.11     | 3.79   | 0.26   | 2.31     | 0.78      | 0.14    | 3.2      |
| MgO                            | ICP-ES | 0.01%   | 0.02    | 0.08    | 0.02    | 0.03    | <0.01     | 0.01     | 0.02   | 0.04   | 0.15     | 0.05      | 0.04    | 0.16     |
| CaO                            | ICP-ES | 0.01%   | 0.08    | 0.14    | 0.08    | 0.08    | 0.02      | 0.05     | 0.07   | 0.09   | 0.25     | 0.03      | 0.07    | 0.3      |
| Na <sub>2</sub> O              | ICP-ES | 0.01%   | 0.18    | 0.24    | 0.18    | 0.13    | 0.03      | 0.03     | 0.2    | 0.11   | 0.34     | 0.07      | 0.02    | 0.42     |
| K <sub>2</sub> O               | ICP-ES | 0.01%   | 3.27    | 2.85    | 3.32    | 1.4     | 0.62      | 2.84     | 3.45   | 0.93   | 3.34     | 3.08      | 0.18    | 3.9      |
| TiO <sub>2</sub>               | ICP-ES | 0.01%   | 0.51    | 0.35    | 0.52    | 0.73    | 0.34      | 0.07     | 0.5    | 0.71   | 0.52     | 0.66      | 2.35    | 0.49     |
| P <sub>2</sub> O <sub>5</sub>  | ICP-ES | 0.01%   | 0.21    | 0.1     | 0.21    | 0.09    | 0.03      | 0.03     | 0.21   | 0.07   | 0.11     | 0.07      | 0.03    | 0.12     |
| MnO                            | ICP-ES | 0.01%   | <0.01   | <0.01   | <0.01   | <0.01   | <0.01     | <0.01    | <0.01  | <0.01  | <0.01    | <0.01     | <0.01   | <0.01    |
| Cr <sub>2</sub> O <sub>3</sub> | ICP-ES | 0.00%   | 0.003   | <0.002  | 0.004   | <0.002  | <0.002    | <0.002   | 0.003  | <0.002 | 0.002    | <0.002    | 0.003   | <0.002   |
| Ba                             | ICP-ES | 1 ppm   | 966     | 952     | 975     | 817     | 401       | 69       | 918    | 677    | 1611     | 967       | 4261    | 1789     |
| Ni                             | ICP-ES | 20 ppm  | <20     | <20     | <20     | <20     | <20       | <20      | <20    | <20    | <20      | <20       | <20     | <20      |
| Sc                             | ICP-ES | 1 ppm   | 4       | 3       | 4       | 3       | <1        | 2        | 4      | 2      | 3        | 4         | 2       | 4        |
| LOI                            | ICP-ES | -5.10%  | 25.8    | 45.6    | 26.2    | 42.5    | 80.7      | 76       | 26     | 21.7   | 22.5     | 20.4      | 14.7    | 22.9     |
| Sum                            | ICP-ES | 0.01%   | 99.8    | 99.89   | 99.8    | 99.89   | 99.96     | 99.94    | 99.8   | 99.9   | 99.87    | 99.86     | 99.8    | 99.86    |
| Be                             | ICP-MS | 1 ppm   | <1      | 1       | <1      | 1       | <1        | <1       | 2      | <1     | 4        | 5         | 2       | 5        |
| Co                             | ICP-MS | 0.2 ppm | 10.6    | 4.2     | 8.3     | 0.7     | <0.2      | 1.4      | 9.3    | 0.6    | 3.4      | 0.4       | 0.6     | 5.7      |
| Cs                             | ICP-MS | 0.1 ppm | 4.6     | 6.4     | 4.6     | 4.5     | 3.3       | 1.1      | 4.3    | 7.3    | 9.8      | 23.4      | 14.5    | 9.3      |
| Ga                             | ICP-MS | 0.5 ppm | 22.5    | 10.2    | 23.8    | 6.9     | 2.1       | 9.5      | 22.7   | 4.2    | 9.1      | 15.6      | 0.8     | 10.7     |
| Hf                             | ICP-MS | 0.1 ppm | 8.8     | 5.1     | 8.6     | 10.2    | 3.3       | 0.8      | 8      | 11.2   | 6.6      | 9.6       | 11      | 6.2      |
| Nb                             | ICP-MS | 0.1 ppm | 44      | 24.6    | 42.6    | 64.7    | 21.9      | 1.9      | 40.8   | 66.5   | 38       | 61.2      | 156.1   | 34.9     |
| Rb                             | ICP-MS | 0.1 ppm | 41.5    | 54.8    | 39.5    | 26.5    | 11.4      | 22.6     | 45.9   | 29.5   | 73       | 75.8      | 26.9    | 83.7     |
| Sn                             | ICP-MS | 1 ppm   | 4       | 3       | 4       | 6       | 3         | <1       | 4      | 5      | 3        | 4         | 20      | 3        |
| Sr                             | ICP-MS | 0.5 ppm | 654.1   | 333.8   | 649.5   | 159.9   | 76.1      | 253.5    | 650.5  | 106.4  | 375.2    | 275       | 80.4    | 449.4    |
| Ta                             | ICP-MS | 0.1 ppm | 2.3     | 1.3     | 2.3     | 3.2     | 1         | 0.1      | 2.3    | 3.3    | 2        | 3.1       | 7.6     | 1.9      |

|              |        |          |       |       |       |       |        |       |       |       |       |       |       |       |
|--------------|--------|----------|-------|-------|-------|-------|--------|-------|-------|-------|-------|-------|-------|-------|
| <b>Th</b>    | ICP-MS | 0.2 ppm  | 26.9  | 13    | 25.1  | 13.2  | 5.5    | 6.7   | 25.3  | 12.7  | 15.5  | 24.5  | 8.4   | 16.3  |
| <b>U</b>     | ICP-MS | 0.1 ppm  | 10.4  | 5.3   | 9.7   | 6.6   | 2.1    | 0.7   | 9.5   | 7.3   | 6.3   | 13.8  | 7.2   | 6.2   |
| <b>V</b>     | ICP-MS | 8 ppm    | 110   | 58    | 102   | 35    | 16     | 21    | 106   | 24    | 59    | 72    | 54    | 65    |
| <b>W</b>     | ICP-MS | 0.5 ppm  | 5.4   | 2.4   | 4.8   | 7     | 2.5    | <0.5  | 4.3   | 8.1   | 4.8   | 5.1   | 18.7  | 3.9   |
| <b>Zr</b>    | ICP-MS | 0.1 ppm  | 406   | 217.4 | 390.5 | 447.8 | 136    | 32.5  | 373.5 | 490.4 | 291.6 | 444.7 | 497.9 | 278.6 |
| <b>Y</b>     | ICP-MS | 0.1 ppm  | 5.5   | 4.6   | 5.5   | 4.4   | 1.3    | 0.5   | 5.4   | 4.5   | 6     | 3.7   | 7.8   | 6.6   |
| <b>La</b>    | ICP-MS | 0.1 ppm  | 74.8  | 31.6  | 69.6  | 24.1  | 12.3   | 24.3  | 71.7  | 16.8  | 37.2  | 46.2  | 11.2  | 40.9  |
| <b>Ce</b>    | ICP-MS | 0.1 ppm  | 123.4 | 50.4  | 116.2 | 36.5  | 20.2   | 35    | 125.1 | 27.5  | 57.9  | 70.7  | 9.8   | 65.3  |
| <b>Pr</b>    | ICP-MS | 0.02 ppm | 12.05 | 4.71  | 11.17 | 3.45  | 1.76   | 2.29  | 12.08 | 2.62  | 5.53  | 5.22  | 0.86  | 5.94  |
| <b>Nd</b>    | ICP-MS | 0.3 ppm  | 38.9  | 13.9  | 36.8  | 11.1  | 4.9    | 4     | 37.5  | 9.3   | 17.4  | 11.9  | 3.3   | 19.3  |
| <b>Sm</b>    | ICP-MS | 0.05 ppm | 5.37  | 2.14  | 5.18  | 1.82  | 0.51   | 0.54  | 5.33  | 1.5   | 2.48  | 1.15  | 0.78  | 2.59  |
| <b>Eu</b>    | ICP-MS | 0.02 ppm | 1.01  | 0.48  | 0.93  | 0.32  | 0.12   | 0.1   | 1.06  | 0.31  | 0.55  | 0.33  | 0.11  | 0.64  |
| <b>Gd</b>    | ICP-MS | 0.05 ppm | 3.1   | 1.44  | 2.96  | 1.15  | 0.39   | 0.25  | 3.15  | 1.04  | 1.64  | 0.94  | 0.97  | 1.75  |
| <b>Tb</b>    | ICP-MS | 0.01 ppm | 0.37  | 0.18  | 0.33  | 0.15  | 0.05   | 0.03  | 0.35  | 0.15  | 0.23  | 0.14  | 0.17  | 0.24  |
| <b>Dy</b>    | ICP-MS | 0.05 ppm | 1.4   | 0.93  | 1.33  | 0.77  | 0.27   | 0.16  | 1.47  | 0.86  | 1.14  | 0.75  | 1.11  | 1.18  |
| <b>Ho</b>    | ICP-MS | 0.02 ppm | 0.21  | 0.17  | 0.2   | 0.17  | 0.05   | 0.02  | 0.19  | 0.18  | 0.22  | 0.15  | 0.26  | 0.26  |
| <b>Er</b>    | ICP-MS | 0.03 ppm | 0.54  | 0.49  | 0.5   | 0.52  | 0.19   | 0.05  | 0.55  | 0.52  | 0.61  | 0.47  | 0.86  | 0.7   |
| <b>Tm</b>    | ICP-MS | 0.01 ppm | 0.08  | 0.07  | 0.07  | 0.07  | 0.02   | <0.01 | 0.08  | 0.08  | 0.09  | 0.05  | 0.15  | 0.11  |
| <b>Yb</b>    | ICP-MS | 0.05 ppm | 0.6   | 0.59  | 0.64  | 0.61  | 0.19   | 0.08  | 0.61  | 0.58  | 0.68  | 0.39  | 0.93  | 0.7   |
| <b>Lu</b>    | ICP-MS | 0.01 ppm | 0.09  | 0.08  | 0.08  | 0.08  | 0.03   | <0.01 | 0.09  | 0.1   | 0.11  | 0.07  | 0.15  | 0.11  |
| <b>TOT/C</b> | LECO   | 0.02%    | 0.14  | 0.14  | 0.16  | 0.58  | 0.25   | 0.09  | 0.14  | 1.25  | 0.21  | 0.14  | 0.46  | 0.15  |
| <b>TOT/S</b> | LECO   | 0.02%    | 8.75  | 31.12 | 8.42  | 24.9  | >50.00 | 16.52 | 8.8   | 10.56 | 10.62 | 4.6   | 2.03  | 11.59 |
| <b>Mo</b>    | ICP-MS | 0.1 ppm  | 2.8   | 0.9   | 3.1   | 1.8   | 0.4    | 0.9   | 2.3   | 1.5   | 1.3   | 1.3   | 1.2   | 1.2   |
| <b>Cu</b>    | ICP-MS | 0.1 ppm  | 12.1  | 9.9   | 16.6  | 16.9  | 1.5    | 2.5   | 13.7  | 11.5  | 7.9   | 6     | 4.9   | 10.6  |
| <b>Pb</b>    | ICP-MS | 0.1 ppm  | 20.9  | 14.8  | 20.3  | 12.9  | 3.9    | 12.7  | 18.1  | 13.4  | 19.9  | 38.4  | 15.9  | 20.1  |
| <b>Zn</b>    | ICP-MS | 1 ppm    | 8     | 14    | 11    | 4     | 4      | 4     | 11    | 6     | 14    | 7     | 32    | 13    |

|           |        |          |      |       |        |        |       |      |        |       |       |       |        |       |
|-----------|--------|----------|------|-------|--------|--------|-------|------|--------|-------|-------|-------|--------|-------|
| <b>Ni</b> | ICP-MS | 0.1 ppm  | 7.8  | 2.8   | 8.6    | 0.2    | 0.3   | 0.8  | 9.1    | 0.7   | 2.6   | 1.3   | 0      | 3.1   |
| <b>As</b> | ICP-MS | 0.5 ppm  | 63.2 | 9.5   | 69.7   | 36.4   | <0.5  | 2.9  | 69.6   | 25.6  | 10.9  | 0.9   | 6806.6 | 12.9  |
| <b>Cd</b> | ICP-MS | 0.1 ppm  | <0.1 | <0.1  | <0.1   | 0.1    | <0.1  | <0.1 | 0.3    | <0.1  | <0.1  | <0.1  | 0.2    | <0.1  |
| <b>Sb</b> | ICP-MS | 0.1 ppm  | 19.9 | 0.2   | 11.7   | 3.5    | 0.1   | <0.1 | 15.2   | 3.5   | 0.2   | 0.2   | 6      | 0.3   |
| <b>Bi</b> | ICP-MS | 0.1 ppm  | 0.5  | 0.3   | 0.7    | 1.2    | 0.1   | 0.3  | 0.5    | 1     | 0.2   | 0.1   | 0      | 0.2   |
| <b>Ag</b> | ICP-MS | 0.1 ppm  | 0.3  | <0.1  | <0.1   | 0.1    | <0.1  | <0.1 | <0.1   | <0.1  | <0.1  | <0.1  | 0.1    | <0.1  |
| <b>Au</b> | ICP-MS | 0.5 ppb  | 12.1 | <0.5  | 4.4    | <0.5   | <0.5  | 1.4  | 0.8    | 4.4   | 0.6   | 1.3   | 334.3  | 0.8   |
| <b>Hg</b> | ICP-MS | 0.01 ppm | 50   | 41.95 | >50.00 | >50.00 | 12.75 | 2.9  | >50.00 | 42.67 | 24.98 | 15.28 | 50     | 33.86 |
| <b>Tl</b> | ICP-MS | 0.1 ppm  | 2.1  | 1.5   | 2.3    | 0.3    | <0.1  | 0.7  | 2      | 0.2   | 1.1   | <0.1  | 0      | 1.7   |
| <b>Se</b> | ICP-MS | 0.5 ppm  | <0.5 | 0.8   | 1.1    | 1.1    | <0.5  | <0.5 | 0.8    | <0.5  | <0.5  | <0.5  | <0.5   | <0.5  |
