# Supplementary material for: The acid-sulfate zone and the mineral alteration styles of the Roman Puteolis (Neapolitan area, Italy): clues on fluid fracturing progression at the Campi Flegrei volcano
Source: Copernicus journal article supplement (doi:10.5194/se-2019-53), 2019-05-08
Supplement: Supplementary file [file se-2019-53-AC1-supplement.pdf]

## Supplementary materials

Table S1 – List of samples, collection date, temperature and mineralogical associations as resulting by XRD analyses corroborated by FTIR and EDS-BSEM study. The sampling includes water spring sampled at Stufe di Nerone. In the temperature column: tc, thermo couple (see chapter 2.2 Sampling, sample preparation and analytical techniques), infr, infrared gun. In the mineralogy column: ?, for minerals to be validated; minerals in red are approximate attribution based on XRD patterns. The orange cells evidence water samples. Representative XRD spectra are in Fig. S1. Further details in this supplement.

| Sample name         | Sampled area | Location*     | Details on sites and sample | Temperature (°C) tc, infr | Sampling date | Mineralogy                                                                 | pH | Note              |
|---------------------|--------------|---------------|-----------------------------|---------------------------|---------------|----------------------------------------------------------------------------|----|-------------------|
| Ss1                 | Pisciarelli  | L1            | -                           | -                         | 09-Jan-13     | Sulfur                                                                     | nd | Piochi et al 2015 |
| S <sub>tot</sub> 2  | Pisciarelli  | L1            | -                           | -                         | 09-Jan-13     | Pickeringite, Alunite, Alunogen, Alum-(K), Sulfur, Amarillite, Mereiterite | nd | Piochi et al 2015 |
| S3                  | Pisciarelli  | L1            | -                           | -                         | 09-Jan-13     | Alunite, Alum-(K)                                                          | nd | Piochi et al 2015 |
| S <sub>tot</sub> 4  | Pisciarelli  | L1            | -                           | -                         | 09-Jan-13     | Alunogen, Alunite, Sulfur, Kaolinite                                       | nd | Piochi et al 2015 |
| S5                  | Pisciarelli  | L2            | -                           | -                         | 09-Jan-13     | Quartz, Amorphous                                                          | nd | Piochi et al 2015 |
| S7                  | Pisciarelli  | L2            | -                           | -                         | 09-Jan-13     | Alunite, Alunogen, Illite/Montmorillonite                                  | nd | Piochi et al 2015 |
| S10                 | Pisciarelli  | L2            | -                           | -                         | 21-Mar-13     | Alunite, Illite/Montmorillonite                                            | nd | Piochi et al 2015 |
| Sf12                | Pisciarelli  | L3 - mud pool | mud                         | -                         | 21-Mar-13     | Alunite, Sulfur, K-Feldspar, Amorphous, Illite                             | nd | Piochi et al 2015 |
| Sf14                | Pisciarelli  | L3 - mud pool | mud                         | -                         | 10-Oct-13     | Alunite Sulfur, K-Feldspar, Amorphous, Illite                              | nd | Piochi et al 2015 |
| S <sub>tot</sub> 16 | Pisciarelli  | L4            | -                           | -                         | 21-Mar-13     | Quartz, Amorphous, Illite/Montmorillonite, Kaolinite                       | nd | Piochi et al 2015 |
| ASA 12-3            | Solfatara    | ASA           | NE-slope, uppermost part    | -                         | 11-Dec-13     | Alunite, Alunogen                                                          | nd | Piochi et al 2015 |
| AP 12-3             | Pisciarelli  | L1            | -                           | -                         | 11-Dec-13     | Alunite, Alunogen, Alum-(K)                                                | nd | Piochi et al 2015 |

|                         |             |               |                            |   |           |                                               |    |                   |
|-------------------------|-------------|---------------|----------------------------|---|-----------|-----------------------------------------------|----|-------------------|
| <b>MP^</b>              | Pisciarelli | L3 - mud pool | mud                        | - | 11-Dec-13 | Alunite, Sulfur K-Feldspar, Amorphous, Illite | nd | Piochi et al 2015 |
| <b>MS</b>               | Solfatara   | pool          | mud                        | - | 11-Dec-13 | Alunite, Sulfur K-Feldspar, Amorphous, Illite | nd | Piochi et al 2015 |
| <b>Red_1_1/15</b>       | Pisciarelli | L50           | reddish deposits           | - | 29-Jan-15 | Alunite, Hematite                             | nd | Piochi et al 2015 |
| <b>Sg12</b>             | Pisciarelli | L3 - mud pool | separated from the mud     | - | 17-Apr-13 | Gypsum                                        | nd | Piochi et al 2015 |
| <b>Lava</b>             | Solfatara   | L5            | NW area from Stuff, dome   | - | 24-Jun-14 | Alunite, Analcime, Quartz                     | nd | Piochi et al 2015 |
| <b>Tephra</b>           | Solfatara   | L5            | NW area from Stuff         | - | 24-Jun-14 | Analcime, Quartz, Gypsum, Illite              | nd | Piochi et al 2015 |
| <b>S8</b>               | Pisciarelli | L2            | -                          | - | 09-Jan-13 | Alunite                                       | nd | Piochi et al 2015 |
| <b>S9</b>               | Pisciarelli | L2            | -                          | - | 11-Mar-13 | Sulfur                                        | nd | Piochi et al 2015 |
| <b>Ss15</b>             | Pisciarelli | L4            | -                          | - | 21-Mar-13 | Sulfur                                        | nd | Piochi et al 2015 |
| <b>Sp13</b>             | Pisciarelli | L3 - mud pool | separated from the mud     | - | 17-Apr-13 | Pyrite                                        | nd | Piochi et al 2015 |
| <b>ASA 24-9</b>         | Solfatara   | ASA           | NE-slope, uppermost part   | - | 24-Sep-14 | Alunite                                       | nd | Piochi et al 2015 |
| <b>AP 24-9_2b</b>       | Pisciarelli | L1            | -                          | - | 24-Sep-14 | Alunite                                       | nd | Piochi et al 2015 |
| <b>AP 24-9_2a</b>       | Pisciarelli | L1            | -                          | - | 24-Sep-14 | Alunite                                       | nd | Piochi et al 2015 |
| <b>AP 24-9</b>          | Pisciarelli | L1            | -                          | - | 24-Sep-14 | Alunite                                       | nd | Piochi et al 2015 |
| <b>ASA 12-3</b>         | Solfatara   | ASA           | NE-slope, uppermost height | - | 11-Dec-13 | Alunite                                       | nd | Piochi et al 2015 |
| <b>AP 12-3</b>          | Pisciarelli | L1            | -                          | - | 09-Jan-13 | Alunite                                       | nd | Piochi et al 2015 |
| <b>Sample 2 alunite</b> | Pisciarelli | L1            | -                          | - | 09-Jan-13 | Alunite                                       | nd | Piochi et al 2015 |
| <b>SSA 24-9 S</b>       | Solfatara   | ASA           | NE-slope, uppermost height | - | 24-Sep-14 | Sulfur                                        | nd | Piochi et al 2015 |
| <b>SS 24-9 bg S</b>     | Solfatara   | Bocca Grande  | -                          | - | 24-Sep-14 | Sulfur                                        | nd | Piochi et al 2015 |
| <b>SS 24-9b S</b>       | Solfatara   | ASA           | NE-slope, lowermost height | - | 24-Sep-14 | Sulfur                                        | nd | Piochi et al 2015 |

|                                              |             |                  |                                     |   |           |                   |    |                   |
|----------------------------------------------|-------------|------------------|-------------------------------------|---|-----------|-------------------|----|-------------------|
| <b>SS 24-9i S</b>                            | Solfatara   | ASA              | NE-slope,<br>intermediate<br>height | - | 24-Sep-14 | Sulfur            | nd | Piochi et al 2015 |
| <b>SP 24-9 S</b>                             | Pisciarelli | L1               | -                                   | - | 24-Sep-14 | Sulfur            | nd | Piochi et al 2015 |
| <b>SP 12-3</b>                               | Pisciarelli | L1 vent          | -                                   | - | 11-Dec-13 | Sulfur            | nd | Piochi et al 2015 |
| <b>SS 12-3 b</b>                             | Solfatara   | ASA              | NE-slope,<br>lowermost<br>height    | - | 11-Dec-13 | Sulfur            | nd | Piochi et al 2015 |
| <b>SS 12-3 i</b>                             | Solfatara   | ASA              | NE-slope,<br>intermediate<br>height | - | 11-Dec-13 | Sulfur            | nd | Piochi et al 2015 |
| <b>SSA 12-3</b>                              | Solfatara   | ASA              | NE-slope,<br>uppermost<br>height    | - | 11-Dec-13 | Sulfur            | nd | Piochi et al 2015 |
| <b>SS 12-13 BG</b>                           | Solfatara   | Bocca<br>Grande  | -                                   | - | 11-Dec-13 | Sulfur            | nd | Piochi et al 2015 |
| <b>Sample 6 Sulfur</b>                       | Pisciarelli | L1               | -                                   | - | 09-Jan-13 | Sulfur            | nd | Piochi et al 2015 |
| <b>Sample 11 Sulfur</b>                      | Pisciarelli | L4               | -                                   | - | 09-Jan-13 | Sulfur            | nd | Piochi et al 2015 |
| <b>Sample 4 Sulfur</b>                       | Pisciarelli | L1               | -                                   | - | 09-Jan-13 | Sulfur            | nd | Piochi et al 2015 |
| <b>Sample 2 Sulfur</b>                       | Pisciarelli | L1               | -                                   | - | 09-Jan-13 | Sulfur            | nd | Piochi et al 2015 |
| <b>MS 24-9 Ag<sub>2</sub>S - elemental S</b> | Solfatara   | Mud pool         | separated from<br>mud               | - | 24-Sep-14 | Sulfur in the mud | nd | Piochi et al 2015 |
| <b>MP 24-9 Ag<sub>2</sub>S - elemental S</b> | Pisciarelli | Mud pool         | separated from<br>mud               | - | 24-Sep-14 | Sulfur in the mud | nd | Piochi et al 2015 |
| <b>Geiser Mud - elemental S</b>              | Pisciarelli | Opened<br>Geiser | -                                   | - | 11-Dec-13 | Sulfur in the mud | nd | Piochi et al 2015 |
| <b>Solfatara - elemental S</b>               | Solfatara   | Mud pool         | separated from<br>mud               | - | 09-Feb-13 | Sulfur in the mud | nd | Piochi et al 2015 |
| <b>MP 12-3 - elemental S</b>                 | Pisciarelli | Mud pool         | separated from<br>mud               | - | 11-Dec-13 | Sulfur in the mud | nd | Piochi et al 2015 |
| <b>MS 12-3 - elemental S</b>                 | Solfatara   | Mud pool         | separated from<br>mud               | - | 11-Dec-13 | Sulfur in the mud | nd | Piochi et al 2015 |
| <b>Geiser Mud CRS+AVS</b>                    | Pisciarelli | Opened<br>Geiser | -                                   | - | 01-Mar-14 | Bulk mud          | nd | Piochi et al 2015 |
| <b>Solfatara CRS+AVS</b>                     | Solfatara   | Mud pool         | -                                   | - | 01-May-13 | Bulk mud          | nd | Piochi et al 2015 |

|                         |             |                      |                                           |      |           |                                                                |    |                   |
|-------------------------|-------------|----------------------|-------------------------------------------|------|-----------|----------------------------------------------------------------|----|-------------------|
| <b>MP 12-3 CRS+AVS</b>  | Pisciarelli | L3 - mud pool        | mud                                       | -    | 11-Dec-13 | Bulk mud                                                       | nd | Piochi et al 2015 |
| <b>MS 12-3 CRS+AVS</b>  | Solfatara   | Mud pool             | -                                         | -    | 11-Dec-13 | Bulk mud                                                       | nd | Piochi et al 2015 |
| <b>L1c S/11-15</b>      | Pisciarelli | L1 vent              | cream-like                                | 90.1 | 09-Nov-15 | -                                                              | nd | -                 |
| <b>L1a S/11-15</b>      | Pisciarelli | L1 wall              | minute Sulfur crystals                    | -    | 09-Nov-15 | -                                                              | nd | -                 |
| <b>L1d wr/11-15</b>     | Pisciarelli | L1 wall              | whole-rock                                | -    | 09-Nov-15 | Alunogen                                                       | nd | -                 |
| <b>L1d1 al/11-15</b>    | Pisciarelli | L1 wall              | hot soft white efflorescence (neve calda) | -    | 09-Nov-15 | Alunogen, Meta-alunogen, Amorphous                             | nd | -                 |
| <b>L1d2 white/11-15</b> | Pisciarelli | L1 wall              | white                                     | -    | 09-Nov-15 | Ammonium sulfate, Alunogen, Amorphous                          | nd | -                 |
| <b>MP/11-15</b>         | Pisciarelli | Mud pool             | black mud                                 | -    | 09-Nov-15 | Alunite, Sulfur, K-feldspar, Pyrite, Mica/Clay, Amorphous      | nd | -                 |
| <b>P PP/11-15</b>       | Pisciarelli | Opened Geiser        | argilla                                   | 52   | 09-Nov-15 | nd                                                             | nd | -                 |
| <b>P PP1/11-15</b>      | Pisciarelli | Opened Geiser        | argilla                                   | 92°C | 09-Nov-15 | Sulfur, Amorphous, Pyrite, Clay, Alum-(K)                      | nd | -                 |
| <b>P PPv/11-15</b>      | Pisciarelli | L19 Geiser-pool wall | green                                     | 34.2 | 09-Nov-15 | Sulfur, Ammonium sulfate (mascagnite type), Alunite, Amorphous | nd | -                 |
| <b>P PPb/11-15</b>      | Pisciarelli | L19 Geiser-pool wall | beige                                     | 50.2 | 09-Nov-15 | Alunite, Amorphous                                             | nd | -                 |
| <b>P Pv/11-15</b>       | Pisciarelli | L20 new vents        | argilla                                   | 60.5 | 09-Nov-15 | Sulfur, Ammonium sulfate, Alunite, Montmorillonite             | nd | -                 |
| <b>P L50 yellow</b>     | Pisciarelli | L50 - high NW slope  | yellow ashy-to-sandy deposits             | -    | 09-Nov-15 | Jarosite, Chabazite?, Alunite, Amorphous                       | nd | -                 |
| <b>P L50 white</b>      | Pisciarelli | L50 - high NW slope  | white ashy-to-sandy deposits              | -    | 09-Nov-15 | Alunite, Clay?, Amorphous                                      | nd | -                 |
| <b>P L50 red</b>        | Pisciarelli | L50 - high NW slope  | reddish ashy-to-sandy deposits            | -    | 09-Nov-15 | Fe-oxide, Jarosite, Alunite, Amorphous                         | nd | -                 |
| <b>SP/11-15</b>         | Solfatara   | Mud pool             | mud                                       | 76.7 | 09-Nov-15 | -                                                              | nd | -                 |

|                      |             |                      |                                      |         |           |                                                                   |    |   |
|----------------------|-------------|----------------------|--------------------------------------|---------|-----------|-------------------------------------------------------------------|----|---|
| <b>BG wr/11-15</b>   | Solfatara   | Bocca Grande         | yellow and black portion at fumarole | 93.1    | 09-Nov-15 | Pyrite, high Amorphous content                                    | nd | - |
| <b>BG pg/11-15</b>   | Solfatara   | Bocca Grande         | yellow portion at fumarole above     | -       | 09-Nov-15 | Sulfur                                                            | nd | - |
| <b>SStg/11-15</b>    | Solfatara   | SSt- Stuff           | light yellow S                       | 63.5-93 | 09-Nov-15 | Sulfur                                                            | nd | - |
| <b>SStb/11-15</b>    | Solfatara   | SSt- Stuff           | whitish                              | 63.5-93 | 09-Nov-15 | Alunite, Alunogen, <b>As-Fe bearing phases</b> , Amorphous        | nd | - |
| <b>SStgf/11-15</b>   | Solfatara   | SSt- Stuff           | yellow S crystals                    | 63.5-93 | 09-Nov-15 | Sulfur                                                            | nd | - |
| <b>SStgc/11-15</b>   | Solfatara   | SSt- Stuff           | columnar S                           | -       | 09-Nov-15 | Sulfur                                                            | nd | - |
|                      |             |                      |                                      |         |           |                                                                   |    |   |
| <b>L1v PSc/6-16</b>  | Pisciarelli | L1vent               | crystalline                          | >87     | 14-Jun-16 | Sulfur                                                            | nd | - |
| <b>L1v PGw/6-16</b>  | Pisciarelli | L1 vent              | gray lenses                          | >87     | 14-Jun-16 | Amorphous, bad spectrum                                           | nd | - |
| <b>L1v PSg/6-16</b>  | Pisciarelli | L1 vent              | S liquid?                            | >87     | 14-Jun-16 | very strange pattern                                              | nd | - |
| <b>L1v Pwc/6-16</b>  | Pisciarelli | L1 vent              | cream-like                           | >87     | 14-Jun-16 | Sulfur, <b>Sb-sulfide</b> , Fe-oxide                              | nd | - |
| <b>L1 Pv/6-16</b>    | Pisciarelli | L1 wall              | vitreous                             | 56.9    | 14-Jun-16 | Clay, Alunite, Quartz, Amorphous                                  | nd | - |
| <b>L1 PvSc/6-16</b>  | Pisciarelli | L1 wall              | vitreous                             | 56.9    | 14-Jun-16 | Sulfur                                                            | nd | - |
| <b>L1 Pwh/6-16</b>   | Pisciarelli | L1 wall              | -                                    | 56.9    | 14-Jun-16 | -                                                                 | nd | - |
| <b>L1 Psalt/6-16</b> | Pisciarelli | L1 wall              | saline crust                         | 67      | 14-Jun-16 | Alum-(K), Alunogen                                                | nd | - |
| <b>L1Pblack/6-16</b> | Pisciarelli | L1 wall              | blackish, at a fracture on wall      | 67      | 14-Jun-16 | <b>Sulfur plus beta sulfur</b> (shifted pattern), Amorphous       | nd | - |
| <b>MP/6-16</b>       | Pisciarelli | L3 - mud pool        | mud                                  | >70     | 14-Jun-16 | Alunite, Sulfur, K-feldspar, Illite, Amorphous                    | nd | - |
| <b>Geiser mud</b>    | Pisciarelli | Opened Geiser        | argilla                              | >90     | 14-Jun-16 | Halotrichite?, Sulfur, Alunite, Illite/montmorillonite, Amorphous | nd | - |
| <b>GnvW bl/6-16</b>  | Pisciarelli | L19 Geiser-pool wall | black argilla                        | 74.7    | 14-Jun-16 | Alunite, Sb-sulfur, Amorphous                                     | nd | - |

|                          |             |                           |                                            |      |           |                                                                |    |   |
|--------------------------|-------------|---------------------------|--------------------------------------------|------|-----------|----------------------------------------------------------------|----|---|
| <b>GnvW be/6-16</b>      | Pisciarelli | L19 Geiser-pool wall      | plastered beige argilla                    | 74.7 | 14-Jun-16 | Mascagnite, Alunite, <b>Arseniate or Phosphate</b> , Amorphous | nd | - |
| <b>P L20 v1/6-16</b>     | Pisciarelli | L20 new vent1             | gray argilla                               | 90   | 14-Jun-16 | Mascagnite, Alunite, Illite/montmorillonite, Amorphous         | nd | - |
| <b>P L20 v2 S/6-16</b>   | Pisciarelli | L20 new vent2             | Sulfur                                     | 44   | 14-Jun-16 | Sulfur (Beta sulfur)                                           | nd | - |
| <b>P L50 white/6-16</b>  | Pisciarelli | L50 - high NW slope       | white ashy-to-sandy deposits               | -    | 14-Jun-16 | Alunite, Alum-(Na), Minamiite?, Amorphous                      | nd | - |
| <b>P L50 yellow/6-16</b> | Pisciarelli | L50 - high NW slope       | yellow ashy-to-sandy deposits              | -    | 14-Jun-16 | Alunite, Coquimbite?, Amorphous                                | nd | - |
| <b>P L50 black/6-16</b>  | Pisciarelli | L50 - high NW slope       | black ashy-to-sandy deposits               | -    | 14-Jun-16 | Jarosite, Alunite, Gypsum, Amorphous                           | nd | - |
| <b>P L20 Nnv/6-16</b>    | Pisciarelli | L20 - wall N of new vents | -                                          | 94   | 14-Jun-16 | -                                                              | nd | - |
| <b>PS/6-16</b>           | Solfatara   | Mud pool                  | mud                                        | 52.9 | 14-Jun-16 | Sulfur, Alunite, Anorthoclase, Amorphous                       | nd | - |
| <b>BG S/6-16</b>         | Solfatara   | Bocca Grande              | S cream-like                               | 93.2 | 14-Jun-16 | Sulfur                                                         | nd | - |
| <b>up BG S/6-16</b>      | Solfatara   | BG-nearby area            | crystalline sulfur                         | 93.2 | 14-Jun-16 | Sulfur                                                         | nd | - |
| <b>buco a/6-16</b>       | Solfatara   | BUCO                      | orange portion into the hole               | -    | 14-Jun-16 | Sulfur (new type-cif), Ammonium Hydrogen Arsenate              | nd | - |
| <b>SMO ASA/6-16</b>      | Solfatara   | SMO                       | white, Monte Olibano                       | 87   | 14-Jun-16 | Sulfur, Alunite, Amorphous                                     | nd | - |
| <b>SMO S/6-16</b>        | Solfatara   | SMO                       | fine yellow, Monte Olibano                 | 87   | 14-Jun-16 | Sulfur                                                         | nd | - |
| <b>ASA m/16-6</b>        | Solfatara   | ASA                       | white on the NE-slope, intermediate height | -    | 14-Jun-16 | Sulfur, Pyrite, Amorphous                                      | nd | - |
| <b>ASA h/16-6</b>        | Solfatara   | ASA                       | white on the NE-slope,                     | -    | 14-Jun-16 | Sulfur, Alunite, <b>Cu-mineral?</b> , Amorphous                | nd | - |

|                      |             |                          | uppermost height                                                       |      |           |                                                                                      |    |   |  |
|----------------------|-------------|--------------------------|------------------------------------------------------------------------|------|-----------|--------------------------------------------------------------------------------------|----|---|--|
| <b>SS/16-6</b>       | Solfatara   | SSt - NE-low             | sulfur                                                                 | -    | 14-Jun-16 | Sulfur                                                                               | nd | - |  |
| <b>SSt Sf/16-6</b>   | Solfatara   | SSt- Stuff               | Sulfur in fracture                                                     | 92   | 14-Jun-16 | Sulfur                                                                               | nd | - |  |
| <b>SSt Sp/16-6</b>   | Solfatara   | SSt- Stuff               | Sulfur as fluff                                                        | 92   | 14-Jun-16 | Sulfur                                                                               | nd | - |  |
| <b>SSt w/16-6</b>    | Solfatara   | SSt- Stuff               | white                                                                  | 45   | 14-Jun-16 | Alunogen, Clay (montmorillonite?), Gypsum                                            | nd | - |  |
| <b>SSt sub/16-6</b>  | Solfatara   | SSt- Stuff               | substratum of sulfur                                                   | 92   | 14-Jun-16 | Periclase (MgO), Alunite, Quartz, Amorphous                                          | nd | - |  |
| <b>SSt win/16-6</b>  | Solfatara   | SSt- Stuff               | efflorescence within Stuff                                             | -    | 14-Jun-16 | Rostite Al (SO <sub>4</sub> ) (OH) ·5H <sub>2</sub> O, Sb-sulfide, Quartz, Amorphous | nd | - |  |
|                      |             |                          |                                                                        |      |           |                                                                                      |    |   |  |
| <b>Ps 7-16*</b>      | Pisciarelli | L3 - mud pool            | mud                                                                    | -    | 28-Jul-16 | Sulfates plus Sulfur, clay (illite), Amorphous                                       | nd | - |  |
| <b>PL 20V1 7-16*</b> | Pisciarelli | L20                      | gray argilla                                                           | -    | 28-Jul-16 | SO <sub>4</sub> (mascagnite), few illite                                             | nd | - |  |
|                      |             |                          |                                                                        |      |           |                                                                                      |    |   |  |
| <b>L3-2</b>          | Pisciarelli | L3 - vent neaby mud pool | efflorescence                                                          | -    | 20-Sep-16 | Alunite, Sulfur K-Feldspar, Amorphous, Pyrite, Coquimbite                            | nd | - |  |
| <b>L1-7</b>          | Pisciarelli | L1 vent                  | efflorescence                                                          | -    | 20-Sep-16 | Alunite, Sulfur, Pyrite, Quartz, Amorphous                                           | nd | - |  |
| <b>L1-6</b>          | Pisciarelli | L1 vent                  | efflorescence                                                          | >95  | 20-Sep-16 | Sulfur, Quartz, Amorphous                                                            | nd | - |  |
| <b>S BG</b>          | Solfatara   | Bocca Grande             | Yellowish sulfur impregnating widely covers the greenish efflorescence | -    | 20-Sep-16 | Sulfur, Quartz, Amorphous                                                            | nd | - |  |
| <b>L3-2</b>          | Pisciarelli | L3 - vent neaby mud pool | Gray portion                                                           | 84.4 | 20-Sep-16 | Alunite, Sulfur, K-Feldspar, Amorphous                                               | nd | - |  |
| <b>Smudbag</b>       | Solfatara   | Mud pool                 | Beidge mud                                                             | -    | 20-Sep-16 | Alunite, Sulfur, K-Feldspar, Amorphous                                               | nd | - |  |

|                      |             |                            |                               |       |           |                                                                                               |    |   |
|----------------------|-------------|----------------------------|-------------------------------|-------|-----------|-----------------------------------------------------------------------------------------------|----|---|
| <b>Smudtube</b>      | Solfatara   | Mud pool                   | Beidge mud                    | 50.4  | 20-Sep-16 | Alunite, Sulfur, K-Feldspar, Amorphous                                                        | nd | - |
| <b>Smud box</b>      | Solfatara   | Mud pool                   | Beidge mud                    | 35-43 | 20-Sep-16 | Alunite, Sulfur, K-Feldspar, Amorphous                                                        | nd | - |
| <b>MP 09/16</b>      | Pisciarelli | L3 - Mud pool              | Beidge mud                    | -     | 20-Sep-16 | Alunite, Sulfur, K-Feldspar, Pyrite, Amorphous                                                | nd | - |
| <b>L1-3 greenish</b> | Pisciarelli | L1 vent                    | greenish efflorescence        | 29.8  | 20-Sep-16 | -                                                                                             | nd | - |
|                      |             |                            |                               |       |           |                                                                                               |    |   |
| <b>MP/2-17</b>       | Pisciarelli | L3 - Mud pool              | gray mud                      | -     | 03-Feb-17 | Alunite, Sulfur, K-Feldspar, Pyrite, Amorphous                                                | nd | - |
| <b>L1-SP2-17</b>     | Pisciarelli | L1 vent                    | sulfur cream, very hot        | -     | 03-Feb-17 | Sulfur                                                                                        | nd | - |
| <b>L1-AP2-17</b>     | Pisciarelli | L1 vent                    | efflorescence                 | -     | 03-Feb-17 | Alunite, Alunogen                                                                             | nd | - |
| <b>L1-SP2-17 low</b> | Pisciarelli | L1 vent                    | sulfur acicular               | -     | 03-Feb-17 | Sulfur                                                                                        | nd | - |
| <b>L1-SP3-17</b>     | Pisciarelli | L1 vent in fracture        | Sulfur acicular efflorescence | -     | 03-Feb-17 | Sulfur                                                                                        | nd | - |
|                      |             |                            |                               |       |           |                                                                                               |    |   |
| <b>MP/04-17</b>      | Pisciarelli | L3 - Mud pool              | gray mud                      | -     | 06-Apr-17 | Alunite, Sulfur, K-Feldspar, Pyrite, Amorphous                                                | nd | - |
| <b>MS/04-17</b>      | Solfatara   | Mud pool                   | Beidge mud                    | -     | 06-Apr-17 | Alunite, Sulfur, K-Feldspar, Amorphous                                                        | nd | - |
|                      |             |                            |                               |       |           |                                                                                               |    |   |
| <b>MPS 517 new</b>   | Solfatara   | Mud pool                   | grey mud                      | -     | 31-May-17 | Kaolinite, Alunite, Sulfur, K-Feldspar, Amorphous (Mascagnite, Sulfur, mica in the surnatant) | nd | - |
| <b>Buco a/517</b>    | Solfatara   | BUCO                       | orange portion in the hole    | -     | 31-May-17 | Sulfur                                                                                        | nd | - |
| <b>L1-S517</b>       | Pisciarelli | L1 vent near green portion | efflorescence                 | -     | 31-May-17 | Sulfur                                                                                        | nd | - |
| <b>L1-S517 high</b>  | Pisciarelli | L1 vent                    | sulfur cream, very hot        | -     | 31-May-17 | Sulfur                                                                                        | nd | - |



|                             |             |               |                                                              |      |           |                                                                   |    |   |
|-----------------------------|-------------|---------------|--------------------------------------------------------------|------|-----------|-------------------------------------------------------------------|----|---|
| <b>BG S/517</b>             | Solfatara   | Bocca Grande  | sulfur                                                       | -    | 31-May-17 | Sulfur                                                            | nd | - |
| <b>MS/517</b>               | Solfatara   | Mud pool      | Beije mud                                                    | -    | 31-May-17 | Sulfur, Alunite, Hydrobiotite/Illite?, Amorphous                  | nd | - |
| <b>MP/2906-17</b>           | Pisciarelli | L3 - Mud pool | gray mud                                                     | -    | 29-Jun-17 | Alunite, Sulfur, K-Feldspar, Pyrite, Amorphous, Illite, Alum-(Na) | nd | - |
| <b>MS/2906-17</b>           | Solfatara   | Mud pool      | Beije mud                                                    | -    | 29-Jun-17 | Sulfur, Alunite, Amorphous, Illite? bad XRD pattern               | nd | - |
| <b>MS new/2906-17</b>       | Solfatara   | Mud pool      | Beije mud                                                    | -    | 29-Jun-17 | Sulfur, Alunite, Alum-(Na), Kaolinite, Amorphous                  | nd | - |
| <b>L60 24/7/17</b>          | Pisciarelli | L60           | Sulfur at the level of the bubbling aquifer in a narrow hole | 83.6 | 24-Jul-17 | Sulfur                                                            | nd | - |
| <b>L3 24/7/17</b>           | Pisciarelli | L3 - mud pool | mud, central mud pool                                        | 76.1 | 24-Jul-17 | Sulfur, Gypsum, K-mascagnite                                      | nd | - |
| <b>L1 main 24/7/17</b>      | Pisciarelli | L1 vent       | Blackish with sulfur                                         | >92  | 24-Jul-17 | Sulfur, Pyrite, Amorphous                                         | nd | - |
| <b>L20 new vent 24/7/17</b> | Pisciarelli | L20 high area | high area south of pool, blackish with S modified from gray  | >86  | 24-Jul-17 | Sulfur, Alunite, Gypsum, Amorphous                                | nd | - |
| <b>L20 bombola</b>          | Pisciarelli | L20 high area | high area south of pool, whitish                             | 47   | 24-Jul-17 | Mascagnite, Illite, Amorphous                                     | nd | - |
| <b>PEXT</b>                 | Pisciarelli | PEXT          | yellowish crystalline Sulfur                                 | 95   | 24-Jul-17 | Sulfur (bad pattern)                                              | nd | - |
| <b>MS 24/7/17</b>           | Solfatara   | mud pool      | mud, mostly dried portion                                    | 48.1 | 24-Jul-17 | Sulfur, Alunite, Sanidine, Pyrite, low Amorphous                  | nd | - |
| <b>BG 24/7/17</b>           | Solfatara   | Bocca Grande  | Blackish with sulfur                                         | 92   | 24-Jul-17 | Sulfur, As species?                                               | nd | - |

|                                   |             |               |                                                            |           |           |                                                                   |    |   |
|-----------------------------------|-------------|---------------|------------------------------------------------------------|-----------|-----------|-------------------------------------------------------------------|----|---|
| <b>MS new</b>                     | Solfatara   | new pool      | liquid and oily mud                                        | -         | 24-Jul-17 | Minamiite, Alunite, K-Feldspar, Amorphous, Kaolinite, bad pattern | nd | - |
| <b>Buco 24/7/17</b>               | Solfatara   | BUCO          | orange portion in the hole                                 | -         | 24-Jul-17 | Sulfur, Amorphous. bad pattern                                    | nd | - |
| <b>MP viadotto 9/17</b>           | Pisciarelli | viadotto      | dried at the foot valley, mud at the inflow area           | 49.7      | 01-Sep-17 | Sulfur, Alunite, Illite, Amorphous (low abundance)                | nd | - |
| <b>L3 9/17</b>                    | Pisciarelli | L3 - mud pool | mud from the bubbling point of the pool, drying            | 63.9-75.6 | 01-Sep-17 | -                                                                 | nd | - |
| <b>L1 wall2 zucch 9/17</b>        | Pisciarelli | L1 wall       | upper part, soft efflorescence                             | 45.1      | 01-Sep-17 | Alunogen (pattern slightly shifted)                               | nd | - |
| <b>L1 wall1 9/17</b>              | Pisciarelli | L1 wall       | between vent and wall 2, white massive with halos          | 43.7      | 01-Sep-17 | Sulfur, Alunogen                                                  | nd | - |
| <b>L1 vent 9/17</b>               | Pisciarelli | L1 vent       | blackish-brownish, low Sulfur                              | >85       | 01-Sep-17 | Sulfur, Alunite, Pyrite, Amorphous                                | nd | - |
| <b>L1 wall 1S 9/17_sep bianco</b> | Pisciarelli | L1 wall       | sulfur at the wall base                                    | 77.5      | 01-Sep-17 | Sulfur, Alunogen                                                  | nd | - |
| <b>L1 wall 1S 9/17_sep S</b>      | Pisciarelli | L1 wall       | sulfur at the wall base                                    | 77.5      | 01-Sep-17 | Sulfur, Alunogen                                                  | nd | - |
| <b>L20 bombola 9/17</b>           | Pisciarelli | L20 high area | high area south of pool, low abundance of whitish material | 52.9      | 01-Sep-17 | Mascagnite, Alum-(K), Illite                                      | nd | - |
| <b>MS1 9/17</b>                   | Solfatara   | mud pool      | south portion, fine and mellow mud                         | 49.9-48.6 | 01-Sep-17 | Sulfur, Alunite                                                   | nd | - |
| <b>MP L3bocchetta 1.9.17</b>      | Pisciarelli | L3 - mud pool | mud from the bubbling point centre of the pool             | 49.9-48.6 | 01-Sep-17 | -                                                                 | nd | - |
| <b>MS2 9/17</b>                   | Solfatara   | mud pool      | north part, mud with acicular                              | 49.9-48.6 | 01-Sep-17 | -                                                                 | nd | - |

|                                          |             |               |                                               |           |           |                                                  |    |   |
|------------------------------------------|-------------|---------------|-----------------------------------------------|-----------|-----------|--------------------------------------------------|----|---|
|                                          |             |               | material and grains                           |           |           |                                                  |    |   |
| <b>MS3 9/17</b>                          | Solfatara   | mud pool      | Sulfur into the fracture determined by drying | 49.9-48.6 | 01-Sep-17 | -                                                | nd | - |
| <b>BG 9/17</b>                           | Solfatara   | Bocca Grande  | Sulfur, abundant in mushy form                | >87.5     | 01-Sep-17 | Sulfur (shifted pattern)                         | nd | - |
| <b>MS new 9/17</b>                       | Solfatara   | new pool      | level lowering, mushy mud that is drying      | 63-70     | 01-Sep-17 | Alunite, Pyrite, Alum-(Na), Kaolinite, Amorphous | nd | - |
| <b>L1 S</b>                              | Pisciarelli | L1 main vent  | -                                             | -         | 18-Sep-17 | Sulfur                                           | nd | - |
| <b>L1 efflorescenza beije_sep rosso</b>  | Pisciarelli | L1 main vent  | reddish from beije efflorescence              | -         | 18-Sep-17 | Alunogen (slightly shifted pattern)              | nd | - |
| <b>L1 efflorescenza beije_sep bianco</b> | Pisciarelli | L1 main vent  | white from the beije efflorescence            | -         | 18-Sep-17 | Alunogen                                         | nd | - |
| <b>PINT S</b>                            | Pisciarelli | PINT          | Acicular Sulfur                               | -         | 18-Sep-17 | Sulfur                                           | nd | - |
| <b>L20 Camino</b>                        | Pisciarelli | L20 high area | Sulfur as a crust                             | -         | 18-Sep-17 | Sulfur, Alunite                                  | nd | - |
|                                          |             |               |                                               |           |           |                                                  |    |   |
| <b>L20 camino mud + S</b>                | Pisciarelli | L20 high area | Sulfur patina on gray clay                    | 94.2      | 18-Oct-17 | Alunite, Sulfur, Amorphous                       | nd | - |
| <b>L20 camino mud + S_S</b>              | Pisciarelli | L20 high area | Sulfur patina on gray clay                    | 94.2      | 18-Oct-17 | Pyrite, Alunite, Sulfur, Amorphous               | nd | - |
| <b>L20 camino efflorescenza</b>          | Pisciarelli | L20 high area | grayish-to-whitish neogenesis                 | 41.5      | 18-Oct-17 | Tschermigite                                     | nd | - |
| <b>L20 camino S patina</b>               | Pisciarelli | L20 high area | Sulfur encrustation, patina                   | -         | 18-Oct-17 | Sulfur                                           | nd | - |
| <b>PINT rosso</b>                        | Pisciarelli | PINT          | red clay containing white rounded grain       | 90.5      | 18-Oct-17 | Alunite, Hematite, Kaolinite, Sanidine           | nd | - |

|                                     |             |                     |                                                                |      |           |                                                                                     |    |                                 |
|-------------------------------------|-------------|---------------------|----------------------------------------------------------------|------|-----------|-------------------------------------------------------------------------------------|----|---------------------------------|
| <b>PINT rosso_bianco</b>            | Pisciarelli | PINT                | white rounded grain of the red clay above                      | 90.5 | 18-Oct-17 | Alunite, Kaolinite                                                                  | nd | -                               |
| <b>PINT S tozzo</b>                 | Pisciarelli | PINT                | Sulfur, blocky                                                 | 88.9 | 18-Oct-17 | Sulfur 01-078-1888                                                                  | nd | -                               |
| <b>PINT rosso palline bianche</b>   | Pisciarelli | PINT                | white clay grains inside the red clay above                    | 90.5 | 18-Oct-17 | -                                                                                   | nd | -                               |
| <b>MP</b>                           | Pisciarelli | L3 - mud pool       | mud at the west border                                         | 88.7 | 18-Oct-17 | Alunite, Biotite, Illite, Clorite, Vermiculite, Pyrite, Sulfur, Sanidine, Amorphous | nd | -                               |
| <b>MP_mud decantato</b>             | Pisciarelli | L3 - mud pool       | mud decanted from water at the bubbling point                  | 84   | 18-Oct-17 | Alunite, Sulfur, Anorthoclase, Amorphous                                            | nd | -                               |
| <b>MP_evapo dendritici</b>          | Pisciarelli | L3 - mud pool       | water at the centre, bubbling point, crystals from evaporation | 84   | 18-Oct-17 | Sulfur, Mascagnite, Alunite, Marialite, Oxybiotite, Amorphous                       | nd | start water sampling from pools |
| <b>MP_evapo tozzi</b>               | Pisciarelli | L3 - mud pool       | water at the centre, bubbling point, crystals from evaporation | 84   | 18-Oct-17 | Ammonium sulfate (mascagnite), Bormuscovite, Sulfur, Paramelaconite (CuO)           | nd | -                               |
| <b>L1 vent S cristallino</b>        | Pisciarelli | L1                  | Sulfur crystals from varios point of the wall                  | -    | 18-Oct-17 | Sulfur (pattern 2283)                                                               | nd | -                               |
| <b>L1 vent S cristallino_substr</b> | Pisciarelli | L1                  | substratum of the Sulfur                                       | -    | 18-Oct-17 | Sulfur, Alunite, Pyrite                                                             | nd | -                               |
| <b>L1 vent S patina</b>             | Pisciarelli | L1 vent             | yellow patina                                                  | 95.2 | 18-Oct-17 | Sulfur                                                                              | nd | -                               |
|                                     |             |                     |                                                                |      |           |                                                                                     |    |                                 |
| <b>L1 parete S</b>                  | Pisciarelli | L1 wall, base       | fine acicular crystals at the base                             | 89.6 | 15-Nov-17 | Sulfur                                                                              | nd | -                               |
| <b>L1 pareteEFF</b>                 | Pisciarelli | L1 wall, upper part | soft white efflorescence                                       | 34.5 | 15-Nov-17 | Alunogen, Alum-(K), Sulfur                                                          | nd | -                               |

|                              |             |                      |                                                                  |      |           |                                                                        |    |   |
|------------------------------|-------------|----------------------|------------------------------------------------------------------|------|-----------|------------------------------------------------------------------------|----|---|
| <b>L1 pareteEFF_impurità</b> | Pisciarelli | L1 wall, upper part  | soft whitish efflorescence                                       | 34.5 | 15-Nov-17 | Alunite (with Cr?), Alunogen                                           | nd | - |
| <b>L1 parete crosta</b>      | Pisciarelli | L1 wall, medial part | hard-to-friable white encrustation                               | 37   | 15-Nov-17 | Alum-(K), Alunite (likely with Cr?)                                    | nd | - |
| <b>L30 mud</b>               | Pisciarelli | L30                  | beige mud in a cm-wide hole filled by water                      | 41.7 | 15-Nov-17 | Alunite, Amorphous, bad pattern                                        | nd | - |
| <b>L3 acqua_decantata</b>    | Pisciarelli | L3 - mud pool        | mud decanted from water at the bubbling point nearby L1          | 85   | 15-Nov-17 | Sulfur, Alunite, Mascagnite, Biotite, Amorphous                        | nd | - |
| <b>L3 acqua_evaporata</b>    | Pisciarelli | L3 - mud pool        | water at the bubbling point nearby L1, crystals from evaporation | 85   | 15-Nov-17 | Mascagnite, Gypsum, Boromuscovite and other difficult to define        | nd | - |
| <b>L3 mud</b>                | Pisciarelli | L3 - mud pool        | mud, nearby PEXT                                                 | 87   | 15-Nov-17 | Alunite, Pyrite, Feldspar, Sulfur, Illite, Amorphous, bad pattern      | nd | - |
| <b>L19 geiser</b>            | Pisciarelli | L19                  | gray mud nearby geiser and fine flowing water                    | 90   | 15-Nov-17 | Alunite, Pyrite, high Amorphous content. bad pattern low crystallinity | nd | - |
|                              |             |                      |                                                                  |      |           |                                                                        |    |   |
| <b>L1 vent S_S</b>           | Piciarelli  | L1 vent              | sulfur at main fumarol                                           | 94.7 | 14-Dec-17 | Sulfur                                                                 | nd | - |
| <b>L1 vent S film_all</b>    | Piciarelli  | L1 vent              | substratum of sulfur main, fumarol                               | 94.7 | 14-Dec-17 | Sulfur, Pyrite, Alunite, Amorphous                                     | nd | - |
| <b>L20 camino S</b>          | Piciarelli  | L20                  | Sulfur                                                           | 77.8 | 14-Dec-17 | Illite, Sulfur, Alunite, Amorphous                                     | nd | - |
| <b>L20 crema</b>             | Piciarelli  | L20                  | Cream-like                                                       | -    | 14-Dec-17 | Alunite, Amorphous                                                     | nd | - |
| <b>L30 mud</b>               | Piciarelli  | L30                  | beige mud in a cm-wide hole filled by water                      | 42.1 | 14-Dec-17 | Alunite, Sulfur, Amorphous. bad pattern                                | nd | - |
| <b>L3 acqua_decantato</b>    | Piciarelli  | L3 - mud pool        | mud decanted from water at                                       | 84.5 | 14-Dec-17 | Sulfur, Alunite, Pyrite, Titanite, Amorphous                           | nd | - |

|                                             |            |               |                                                                  |      |           |                                                        |    |   |
|---------------------------------------------|------------|---------------|------------------------------------------------------------------|------|-----------|--------------------------------------------------------|----|---|
|                                             |            |               | the bubbling point nearby L1                                     |      |           |                                                        |    |   |
| <b>L3 acqua_cristallizzato</b>              | Piciarelli | L3 - mud pool | water at the bubbling point nearby L1, crystals from evaporation | 84.5 | 14-Dec-17 | Mascagnite, Tschermigite, Letovicite, Mohrite, Biotite | nd | - |
| <b>L3 mud MP</b>                            | Piciarelli | L3 - mud pool | mud, nearby PEXT                                                 | 77.4 | 14-Dec-17 | Pyrite, Sulfur, Alunite, Sanidine, Amorphous, Illite?  | nd | - |
| <b>L19 Geiser mud</b>                       | Piciarelli | L19           | mud, between Geisers                                             | -    | 14-Dec-17 | Alunite, Sulfur, Plagioclase, Amorphous                | nd | - |
| <b>L19 Geiser marrone_all crosta</b>        | Piciarelli | L19           | uppermost Geiser, bulk, brown crust                              | 95.3 | 14-Dec-17 | Alunite, Pyrite (greigite), Amorphous, Quartz?         | nd | - |
| <b>L19 Geiser marrone</b>                   | Piciarelli | L19           | uppermost Geiser, brown material from above sample               | 95.3 | 14-Dec-17 | Alunite, Sanidine, Phlogopite, Amorphous               | nd | - |
| <b>L19 Geiser crema_whole</b>               | Piciarelli | L19           | uppermost Geiser, cream-like, bulk                               | 95.3 | 14-Dec-17 | Alunite, Amorphous                                     | nd | - |
| <b>L19 Geiser crema_imp bianco</b>          | Piciarelli | L19           | uppermost Geiser, cream-like, whitish from the above sample      | 95.3 | 14-Dec-17 | Pyrite, Alunite, Amorphous                             | nd | - |
| <b>Geiser bianco (anche un po' arancio)</b> | Piciarelli | Geiser        | Back wall, white                                                 | -    | 14-Dec-17 | Alunite, Quartz, Amorphous                             | nd | - |
| <b>Geiser arancione</b>                     | Piciarelli | Geiser        | wall toward L60, orange                                          | -    | 14-Dec-17 | Jarosite, Alunite, Amorphous                           | nd | - |
| <b>Geiser rosso</b>                         | Piciarelli | Geiser        | nearby the main output, reddish                                  | -    | 14-Dec-17 | Jarosite, Alunite, Fe-hydroxides                       | nd | - |
|                                             |            |               |                                                                  |      |           |                                                        |    |   |
| <b>MP acqua polla =L3 acqua</b>             | Piciarelli | L3 - mud pool | grayish water, crystals from evaporation                         | 85.4 | 18-Jan-18 | Mascagnite, Letovicite                                 | nd | - |

|                          |            |               |                                                        |      |           |                                                            |    |   |
|--------------------------|------------|---------------|--------------------------------------------------------|------|-----------|------------------------------------------------------------|----|---|
| <b>MP mud</b>            | Piciarelli | L3 - mud pool | blackish mud                                           | 77.1 | 18-Jan-18 | Alunite, Sulfur, Pyrite, Anorthoclase, Amorphous, illite   | nd | - |
| <b>L1 vent S</b>         | Piciarelli | L1 vent       | crystallizing sulfur                                   | 94   | 18-Jan-18 | Sulfur, Pyrite                                             | nd | - |
| <b>L1 ventparete S</b>   | Piciarelli | L1 wall       | diffuse crystalline sulfur on the wall nearby the vent | 89.9 | 18-Jan-18 | Alunogen, Sulfur                                           | nd | - |
| <b>L1 parete verde</b>   | Piciarelli | L1 wall       | greenish portions within whitish part                  | 72.5 | 18-Jan-18 | -                                                          | nd | - |
| <b>PINT S_puro</b>       | Piciarelli | PINT          | Blocky and dendritic sulfur                            | 93.4 | 18-Jan-18 | Sulfur                                                     | nd | - |
| <b>PINT S_bulk</b>       | Piciarelli | PINT          | Blocky and dendritic sulfur                            | 93.4 | 18-Jan-18 | Sulfur                                                     | nd | - |
| <b>PINT rosa</b>         | Piciarelli | PINT          | pinkish material                                       | 93.4 | 18-Jan-18 | Feldspatoid? Very high abundance of Amorphous. bad pattern | nd | - |
| <b>L20 vent mud</b>      | Piciarelli | L20           | blackish-greenish mud on whitish material              | 95.8 | 18-Jan-18 | Alunite, Pyrite, Amorphous                                 | nd | - |
| <b>L19 vent Geiser S</b> | Piciarelli | L19 Geiser    | blackish-greenish mud on whitish material              | 95.8 | 18-Jan-18 | -                                                          | nd | - |
| <b>L20 camino mud</b>    | Piciarelli | L20           | dried mud esfoliar                                     | 81   | 18-Jan-18 | Alunite, Amorphous                                         | nd | - |
| <b>L70 S</b>             | Piciarelli | L70           | Sulfur on chimney at the base of the collapsed slope   | 68   | 18-Jan-18 | Sulfur                                                     | nd | - |
| <b>L70 eff</b>           | Piciarelli | L70           | efflorescence uppermost on the wall source of L70S     | -    | 18-Jan-18 | Alunogen, Tschermingite, Amorphous                         | nd | - |

|                                 |            |               |                                                                                              |      |           |                                                        |    |   |
|---------------------------------|------------|---------------|----------------------------------------------------------------------------------------------|------|-----------|--------------------------------------------------------|----|---|
| <b>L60 Geiser acqua</b>         | Piciarelli | L60           | limpid water from bubbling aquifer into a hole back to the Geiser, crystals from evaporation | 93.6 | 18-Jan-18 | Tschermingite, Gypsum                                  | nd | - |
| <b>L60 Geiser S</b>             | Piciarelli | L60           | Sulfur within the hole above in which the acquifer is bubbling                               | -    | 18-Jan-18 | Sulfur                                                 | nd | - |
|                                 |            |               |                                                                                              |      |           |                                                        |    | - |
| <b>MP acqua polla =L3 acqua</b> | Piciarelli | L3 - mud pool | turbid, grayish water, crystals from evaporation                                             | 94.1 | 16-Feb-18 | Tschermigite, Mascagnite                               | nd | - |
| <b>MP</b>                       | Piciarelli | L3 - mud pool | gray mud                                                                                     | 74.1 | 16-Feb-18 | Alunite, Sulfur, Pyrite, orthoclase, Illite, Amorphous | nd | - |
| <b>L30 fiori</b>                | Piciarelli | L30           | beije efflorescence nearby the cm-wide hole                                                  | 40.7 | 16-Feb-18 | Alunogen, Quartz                                       | nd | - |
| <b>L30 eff1</b>                 | Piciarelli | L30           | beije efflorescence on the wall nearby the cm-wide hole                                      | 40.7 | 16-Feb-18 | Alunogen plus other but very complicated pattern       | nd | - |
| <b>L30 eff2</b>                 | Piciarelli | L30           | beije efflorescence on the wall nearby the cm-wide hole                                      | 40.7 | 16-Feb-18 | -                                                      | nd | - |
| <b>CIN1al_grigio</b>            | Cinofilo   | CIN           | uppermost part, gray portion in the whitish material                                         | -    | 16-Feb-18 | Pyrite, Sulfur, Sanidine, Amorphous                    | nd | - |



|                                 |            |               |                                                                                               |      |           |                                                                                    |    |   |
|---------------------------------|------------|---------------|-----------------------------------------------------------------------------------------------|------|-----------|------------------------------------------------------------------------------------|----|---|
| <b>CIN1a1_bianco</b>            | Cinofilo   | CIN           | uppermost part, whitish material                                                              | -    | 16-Feb-18 | Titanium oxide, Opal, Amorphous (high content)                                     | nd | - |
| <b>CIN2 crema</b>               | Cinofilo   | CIN           | uppermost part, cream-like whitish material                                                   | -    | 16-Feb-18 | Titanium oxide (Al), Opal, Amorphous (high content)                                | nd | - |
| <b>F1 CIN duro</b>              | Cinofilo   | CIN           | low hot site, hard encrustation                                                               | 96.2 | 16-Feb-18 | Alunogen, Zeolites, Sanidine                                                       | nd | - |
| <b>F1 CIN S</b>                 | Cinofilo   | CIN           | low hot site, yellow sulfur                                                                   | 96.2 | 16-Feb-18 | Sulfur                                                                             | nd | - |
| <b>F1 CIN2 ara</b>              | Cinofilo   | CIN           | low hot site, orange concretion                                                               | 96.2 | 16-Feb-18 | Jarosite, Alunite                                                                  | nd | - |
| <b>CIN1 b eff arancione</b>     | Cinofilo   | CIN           | low hot site, orange concretion, at the base                                                  | 53.6 | 16-Feb-18 | Sanidine, Gypsum, Clay interlayer (illite/Montmorillonite)                         | nd | - |
| <b>CIN1 b eff bianca</b>        | Cinofilo   | CIN           | low hot site, orange concretion, at the top                                                   | 53.6 | 16-Feb-18 | Tamarugite, Jarosite, Hexahydrite, Picroparmacolite, Zaherite                      | nd | - |
| <b>MP acqua polla =L3 acqua</b> | Piciarelli | L3 - mud pool | turbid, greenish water, crystals from evaporation                                             | 84.3 | 16-Mar-18 | Mascagnite, Tschermigite, Letovicite, Muscovite, Sulfur plus other but complicated | nd | - |
| <b>MP</b>                       | Piciarelli | L3 - mud pool | gray mud                                                                                      | 84.3 | 16-Mar-18 | Alunite, Amorphous, Pyrite, Sanidine, Illite                                       | nd | - |
| <b>PINT S</b>                   | Piciarelli | PINT          | dendritic, encrusted sulfur                                                                   | 94.4 | 16-Mar-18 | Sulfur pure                                                                        | nd | - |
| <b>L60 acqua</b>                | Piciarelli | L60           | clean water in the hole back to the Geiser, deepened aquifer level, crystals from evaporation | 92.2 | 16-Mar-18 | Alunogen, Manganese thiocyanate, Akuammine, Aluminium Sulfate                      | nd | - |

|                               |            |                        |                                                                                  |      |           |                                                     |    |   |
|-------------------------------|------------|------------------------|----------------------------------------------------------------------------------|------|-----------|-----------------------------------------------------|----|---|
|                               | Piciarelli |                        | Sulfur at the deepened aquifer level in the hole back to the Geiser above        | 92.2 | 16-Mar-18 | Sulfur                                              | nd | - |
| <b>L60 S</b>                  |            | L60                    |                                                                                  |      |           |                                                     |    |   |
|                               | Piciarelli |                        | white portion at the deepened aquifer level in the hole back to the Geiser above | 92.2 | 16-Mar-18 | Amorphous, Alunite, Sulfur                          | nd | - |
| <b>L60 S_bianco</b>           |            | L60                    |                                                                                  |      |           |                                                     |    |   |
|                               | Piciarelli |                        | orange-reddish portion on whitish substratum                                     | -    | 16-Mar-18 | Alunite, Amorphous, Pyrite, Illite/Montmorillonite? | nd | - |
| <b>L20 rugine_bianco</b>      |            | L20                    |                                                                                  |      |           |                                                     |    |   |
|                               | Piciarelli | parte alta a sud polla | orange-to-reddish portions of previous sample                                    | -    | 16-Mar-18 | Amorphous, Alunite, Montmorillonite                 | nd | - |
| <b>L20 rugine_rosa</b>        |            |                        |                                                                                  |      |           |                                                     |    |   |
|                               | Piciarelli |                        | substratum for S, south of L60                                                   | -    | 16-Mar-18 | Sulfur, low abundant Alunite                        | nd | - |
| <b>L19 vent N S</b>           |            | L19                    |                                                                                  |      |           |                                                     |    |   |
|                               | Piciarelli |                        | substratum for S, south of L60                                                   | -    | 16-Mar-18 | Sulfur, Amorphous, Alunite, Feldspar?               | nd | - |
| <b>L19 vent N S_substrato</b> |            | L19                    |                                                                                  |      |           |                                                     |    |   |
|                               | Piciarelli |                        | acicular whitish crystals forming an efflorescence at the surface                | -    | 01-Apr-18 | Alunogen                                            | nd | - |
| <b>Cam Caliro</b>             |            | Geiser                 |                                                                                  |      |           |                                                     |    |   |
|                               | Piciarelli | L3 - mud pool          | water                                                                            | 84.6 | 22-May-18 | Alunogen, Mascagnite                                | nd | - |
| <b>L3 water pool</b>          |            |                        |                                                                                  |      |           |                                                     |    |   |
|                               | Piciarelli | L3 - mud pool          | gray mud                                                                         | 84.6 | 22-May-18 | Alunite, Sanidine, Pyrite, Sulfur, Amorphous        | nd | - |
| <b>MP</b>                     |            |                        |                                                                                  |      |           |                                                     |    |   |
|                               | Piciarelli | Viadotto               | gray, stratified mud                                                             | 40.8 | 22-May-18 | Alunite, Sanidine, Pyrite, Sulfur, Amorphous        | nd | - |
| <b>Viadotto</b>               |            |                        |                                                                                  |      |           |                                                     |    |   |
|                               | Piciarelli |                        | beije, humid mud in a cm-wide hole                                               | 71   | 22-May-18 | Alunite, Amorphous                                  | nd | - |
| <b>L30 mud</b>                |            | L30                    |                                                                                  |      |           |                                                     |    |   |

|                                             |            |                    |                                                    |      |           |                                                            |    |   |
|---------------------------------------------|------------|--------------------|----------------------------------------------------|------|-----------|------------------------------------------------------------|----|---|
| <b>L1 vent S</b>                            | Piciarelli | L1 vent            | low abundance of Sulfur on the blackish substratum | 95.1 | 22-May-18 | Sulfur                                                     | nd | - |
| <b>PINT S</b>                               | Piciarelli | PINT               | dendritic encrustated sulfur                       | 94.8 | 22-May-18 | Sulfur                                                     | nd | - |
| <b>L20 new vent mud</b>                     | Piciarelli | L20                | gray mud around the vent, reddish at the surface   | 94.9 | 22-May-18 | Alunite, Pyrite, Clay (Illite/Montmorillonite interlayer?) | nd | - |
| <b>L20 eff beije</b>                        | Piciarelli | L20, on the east   | beije efflorescence, flower-like                   | -    | 22-May-18 | Alum-(Na), Letovicite                                      | nd | - |
| <b>L20 eff bianca</b>                       | Piciarelli | L20, on the east   | white efflorescence, flower-like                   | -    | 22-May-18 | Tamarugite, Feldspar                                       | nd | - |
| <b>L19 N vent S</b>                         | Piciarelli | L19                | sulfur on greenish-whitish wall                    | -    | 22-May-18 | Sulfur                                                     | nd | - |
| <b>L60 S</b>                                | Piciarelli | a monte del Geiser | Sulfur at the water level of the hole above        | 93.9 | 22-May-18 | Sulfur                                                     | nd | - |
| <b>Geiser ara</b>                           | Piciarelli | intorno al Geiser  | orange exfoliating encrustation                    |      | 22-May-18 | Tschermigite, Jarosite, Amorphous                          | nd | - |
| <b>MP</b>                                   | Piciarelli | L3 - mud pool      | blackish mud                                       | 83.8 | 26-Jun-18 | Alunite, Sanidine, Pyrite, Sulfur, Amorphous               | nd | - |
| <b>MP acqua polla =L3 acqua</b>             | Piciarelli | L3 - mud pool      | blackish turbid water, crystals from evaporation   | 83.8 | 26-Jun-18 | Mascagnite, Gypsum, Zeolites                               | nd | - |
| <b>MP acqua polla =L3 acqua con residuo</b> | Piciarelli | L3 - mud pool      | blackish turbid water, crystals from evaporation   | 83.8 | 26-Jun-18 | Mascagnite, Gypsum, Zeolites                               | nd | - |

|                                 |             |                         |                                                        |      |           |                                                                 |    |   |
|---------------------------------|-------------|-------------------------|--------------------------------------------------------|------|-----------|-----------------------------------------------------------------|----|---|
| <b>L1-L3 eff suolo</b>          | Piciarelli  | between pool and L1     | orange efflorescence at the soil                       | -    | 26-Jun-18 | Mascagnite, Zeolite, Letovicite                                 | nd | - |
| <b>L30 eff</b>                  | Piciarelli  | L30, nearby hole        | whitish flower-like efflorescence newrby greenish part | -    | 26-Jun-18 | Alunogen, Fe-phosphate? and/or Jarosite                         | nd | - |
| <b>L30 eff_blocchetto</b>       | Piciarelli  | L30, nearby hole        | white flower on the greenish portions                  | -    | 26-Jun-18 | Alunite, Alunogen, Amorphous                                    | nd | - |
| <b>L30-L1 eff</b>               | Pisciarelli | between L30 and L1      | soft, whitish                                          | -    | 26-Jun-18 | Alunogen, Chabazite                                             | nd | - |
| <b>L100 base</b>                | Piciarelli  | L100, south west of L60 | dried mushy efflorescence, at the base of the wall     | -    | 26-Jun-18 | Alunite, Alunogen                                               | nd | - |
| <b>L100 granu</b>               | Piciarelli  | L100, south west of L60 | dried granular efflorescence, medial on the wall       | -    | 26-Jun-18 | Alunite, Alunogen                                               | nd | - |
| <b>L100 eff</b>                 | Piciarelli  | L100, south west of L60 | friable encrustation on the granular efflorescence     | -    | 26-Jun-18 | Alunite, Alunogen                                               | nd | - |
| <b>L100 zucc</b>                | Piciarelli  | L100, south west of L60 | sugar-like efflorescence, topmost                      | -    | 26-Jun-18 | Alunogen                                                        | nd | - |
|                                 |             |                         |                                                        |      |           |                                                                 |    |   |
| <b>MP</b>                       | Piciarelli  | L3 - mud pool           | mud                                                    | 81.6 | 18-Jul-18 | Alunite, Sanidine, Pyrite, Sulfur, OxyBiotite/illite, Amorphous | nd | - |
| <b>MP acqua polla =L3 acqua</b> | Piciarelli  | L3 - mud pool           | water, crystals from evaporation                       | 81.6 | 18-Jul-18 | Mascagnite, Sulfur, Biotite                                     | nd | - |
| <b>L3 schiuma</b>               | Piciarelli  | L3 - mud pool           | foam at the pool limit                                 | 81.6 | 18-Jul-18 | Sulfur, Alunite, Melanterite                                    | nd | - |

|                    |             |                                   |                                                                  |      |           |                                                                   |         |   |
|--------------------|-------------|-----------------------------------|------------------------------------------------------------------|------|-----------|-------------------------------------------------------------------|---------|---|
| <b>L1S</b>         | Piciarelli  | L1 parete                         | low abundant sulfur                                              | -    | 18-Jul-18 | Sulfur                                                            | nd      | - |
| <b>L71S</b>        | Piciarelli  | L71                               | low abundant sulfur along the collapsed and mined wall           | 94.1 | 18-Jul-18 | Sulfur                                                            | nd      | - |
| <b>PEXT S</b>      | Piciarelli  | PEXT                              | dendritic hair-like sulfur                                       | 94.6 | 18-Jul-18 | Sulfur                                                            | nd      | - |
| <b>PINT S</b>      | Piciarelli  | PINT                              | dendritic hair-like encrustation of sulfur                       | 95   | 18-Jul-18 | Sulfur                                                            | nd      | - |
| <b>L20M ara</b>    | Pisciarelli | top L20                           | orange wall along the uppermost pathway                          | -    | 18-Jul-18 | Tschermigite, Illite/Montmorillonite, Amorphous (low abundance)   | nd      | - |
| <b>L60 S</b>       | Piciarelli  | L60                               | deepening water level in the hole back to Geiser                 | -    | 18-Jul-18 | Sulfur                                                            | nd      | - |
| <b>L60b acqua</b>  | Piciarelli  | L60 other                         | bubbling water between L60 and geiser, crystals from evaporation | -    | 18-Jul-18 | any crystallization                                               | nd      | - |
| <b>MP-viadotto</b> | Piciarelli  | between L1, viadotto, pool border | mushy blackish mud                                               | 55.3 | 26-Sep-18 | Alunite, Sulfur, Amorphous (low abundance)                        | 3.9-4.5 | - |
| <b>L3 acqua</b>    | Piciarelli  | L3 - mud pool                     | water nearby PEXT, crystals from evaporation                     | 94.3 | 26-Sep-18 | Illite/Montmorillonite, Ammonium K sulfate                        | 4.8     | - |
| <b>MP-L3</b>       | Piciarelli  | L3 - mud pool                     | black, granular mud                                              | 94.3 | 26-Sep-18 | Alunite, Sanidine, Pyrite, Sulfur, HydroBiotite/Illite, Amorphous | 4.8     | - |
| <b>L3 Geiser</b>   | Piciarelli  | L3 - mud pool                     | water nearby the Geiser, crystals                                | 80.1 | 26-Sep-18 | Mascagnite, Koktaite?, Sulfur                                     | 5.2     | - |

|                       |            |                |                                                                |      |           |                                              |     |   |
|-----------------------|------------|----------------|----------------------------------------------------------------|------|-----------|----------------------------------------------|-----|---|
|                       |            |                | from evaporation                                               |      |           |                                              |     |   |
| <b>L60 S</b>          | Piciarelli | L60            | deepening water level in the hole back to Geiser               | 93.9 | 26-Sep-18 | Sulfur                                       | 1.6 | - |
| <b>L60 acqua</b>      | Piciarelli | L60 other      | bubbling water                                                 | 93.9 | 26-Sep-18 | -                                            | 1.6 | - |
| <b>L1vent nero</b>    | Piciarelli | L1 vent        | low abundant sulfur                                            | 95.8 | 26-Sep-18 | Voltaite, Coquimbite, Pyrite                 | 1.3 | - |
| <b>L1 base S</b>      | Piciarelli | L1             | yellow sulfur at the wall base                                 | -    | 26-Sep-18 | Sulfur                                       | nd  | - |
| <b>L1 parete S</b>    | Piciarelli | L1             | pale yellow sulfur along the wall                              | -    | 26-Sep-18 | Sulfur                                       | nd  | - |
| <b>L1 bianco zucc</b> | Piciarelli | L1             | sugar-like along the wall                                      | -    | 26-Sep-18 | Alunogen, Alum-(K)                           | nd  | - |
| <b>PINT S</b>         | Piciarelli | PINT           | dendritic, encrustated, hair-like sulfur                       | 89.1 | 26-Sep-18 | Sulfur                                       | nd  | - |
| <b>BG</b>             | Solfatara  | Bocca Grande   | strong yellowish encrustation                                  | -    | 26-Sep-18 | Ammonium chloride, Arsenic sulfide (Realgar) | nd  | - |
| <b>BG</b>             | Solfatara  | Bocca Grande   | strong yellowish encrustation                                  | -    | 26-Sep-18 | Ammonium chloride, Arsenic sulfide (Realgar) | nd  | - |
| <b>BG</b>             | Solfatara  | Bocca Grande   | strong yellowish encrustation                                  | -    | 26-Sep-18 | Ammonium chloride, Arsenic sulfide (Realgar) | nd  | - |
|                       |            |                |                                                                |      |           |                                              |     |   |
| <b>L60b</b>           | Piciarelli | L60 other      | bubbling milky water, crystals from evaporation                | 94   | 30-Oct-18 | Potassium Ammonium Aluminum Sulfate Hydrate  | 1-2 | - |
| <b>L60</b>            | Piciarelli | L60 other      | milky water, deepened aquifer level, crystals from evaporation | 91.8 | 30-Oct-18 | no sample                                    | 1-2 | - |
| <b>Fratturina</b>     | Piciarelli | between L30-L1 | collected spray from a cm-long fracture, crystals              | 95.6 | 30-Oct-18 | Mascagnite                                   | 7   | - |

|                     |            |                 |                                                     |      |           |                                                                   |      |   |
|---------------------|------------|-----------------|-----------------------------------------------------|------|-----------|-------------------------------------------------------------------|------|---|
|                     |            |                 | from evaporation                                    |      |           |                                                                   |      |   |
| <b>MP</b>           | Piciarelli | L3 - mud pool   | gray-black mud with up to cm-sized components       | 91.2 | 30-Oct-18 | Alunite, Sanidine, Pyrite, Sulfur, HydroBiotite/Illite, Amorphous | 5    | - |
| <b>L3 acqua</b>     | Piciarelli | L3 - mud pool   | turbid water, crystals from evaporation             | 90.5 | 30-Oct-18 | Mascagnite, Sulfur, Clay mineral                                  | 5    | - |
| <b>L1 vent</b>      | Piciarelli | L1 vent         | gray-black without sulfur                           | 95   | 30-Oct-18 | Pyrite, Alunite, HydroBiotite/Illite, Amorphous                   | -    | - |
| <b>L1 S</b>         | Piciarelli | L1 base         | sulfur at the wall base                             | -    | 30-Oct-18 | Sulfur                                                            | -    | - |
| <b>MP viadotto</b>  | Piciarelli | viadotto        | mud with water abundance                            | -    | 30-Oct-18 | Alunite, Sanidine, Sulfur, Amorphous, Illite?                     | -    | - |
| <b>L20 camino</b>   | Piciarelli | L20             | gray mud                                            | 91.8 | 30-Oct-18 | Alunite, Pyrite, Amorphous                                        | -    | - |
| <b>L19</b>          | Piciarelli | L19             | translucid black mud with orange and white crystals | 94.8 | 30-Oct-18 | Pyrite, Alunite, Amorphous (low abundance)                        | -    | - |
| <b>L100S</b>        | Piciarelli | L100            | sulfur                                              | 92.6 | 30-Oct-18 | Sulfur                                                            | -    | - |
| <b>L100 nero</b>    | Piciarelli | L100            | substratum of sulfur                                | 92.6 | 30-Oct-18 | Sulfur, Quartz, Amorphous                                         | -    | - |
| <b>L70</b>          | Piciarelli | L70             | black material with sulfur                          | 93.3 | 30-Oct-18 | -                                                                 | -    | - |
| <b>Stufe Pozzo1</b> | Baia       | Stufe di Nerone | water from well, crystals from evaporation          | 76   | 31-Oct-18 | Halite                                                            | 7.06 | - |
| <b>Stufe spring</b> | Baia       | Stufe di Nerone | water springs, crystals from evaporation            | 78.6 | 31-Oct-18 | Halite                                                            | 7    | - |

|                         |            |                                 |                                                                           |      |           |                                                                     |   |   |
|-------------------------|------------|---------------------------------|---------------------------------------------------------------------------|------|-----------|---------------------------------------------------------------------|---|---|
| <b>L60b acqua</b>       | Piciarelli | L60 other                       | bubbling milky water between L60 and geiser, crystals from evaporation    | 92.6 | 29-Nov-18 | Ammonium sulfate, Alum-(K)                                          | - | - |
| <b>L60 mud</b>          | Piciarelli | L60 wall on the back            | plastered grayish mud                                                     | -    | 29-Nov-18 | Alunite, Orthoclase, Pyrite, Amorphous                              | - | - |
| <b>L3 acqua</b>         | Piciarelli | L3 - mud pool                   | milky grayish water, crystals from evaporation                            | 85.7 | 29-Nov-18 | Mascagnite, Koktaite (sulfate calcium ammonium hydrate)             | - | - |
| <b>MP</b>               | Piciarelli | L3 - mud pool                   | mud with cm-sized components                                              | 85.7 | 29-Nov-18 | Alunite, Sulfur, Hydrobiotite/illite, Orthoclase, Pyrite, Amorphous | - | - |
| <b>PEXT S</b>           | Piciarelli | PEXT                            | S encrustation and crystals                                               | 93.7 | 29-Nov-18 | Sulfur                                                              | - | - |
|                         |            |                                 |                                                                           |      |           |                                                                     |   |   |
| <b>L1 wext</b>          | Piciarelli | L1, external side, proxy to L30 | efflorescence and encrustation through a fracture of the white wall       | -    | 17-Jan-19 | Alunite, Alunogen                                                   | - | - |
| <b>G19 fango ess</b>    | Piciarelli | G19, mud vent                   | dried gray-greenish mud from a vent opened nearby the Geiser and the pool | 91.5 | 17-Jan-19 | Alunite, Amorphous                                                  | - | - |
| <b>G19 fango fluido</b> | Piciarelli | G19, mud vent                   | gray fluid mud coexisting with the above                                  | 91.5 | 17-Jan-19 | Alunite, Mascagnite, Amorphous.                                     | - | - |
| <b>G19-S</b>            | Piciarelli | G19, mud vent                   | yellowish encrustation on the mud above                                   | 91.5 | 17-Jan-19 | Sulfur, Alunite                                                     | - | - |
| <b>G19_ara</b>          | Piciarelli | G19, mud vent                   | brow-orange encrustation on the mud above                                 | 91.5 | 17-Jan-19 | Clairite, Mohrite                                                   | - | - |



|                             |            |               |                                                                 |      |           |                                                   |   |   |
|-----------------------------|------------|---------------|-----------------------------------------------------------------|------|-----------|---------------------------------------------------|---|---|
| <b>G19_eff bianca</b>       | Piciarelli | G19, mud vent | whitish encrustation coexisting with the G19 materials above    | 91.5 | 17-Jan-19 | Alunite, Jarosite?, Amorphous                     | - | - |
| <b>MP</b>                   | Piciarelli | L3 - mud pool | decanted mud sample from the east side of the pool              | 88.6 | 17-Jan-19 | Alunite, Sulfur, Pyrite, Orthoclase, Amorphous    | - | - |
| <b>L3</b>                   | Piciarelli | L3 - mud pool | water from the east side of the pool, crystals from evaporation | 88.6 | 17-Jan-19 | Mascagnite, Gypsum, Koktaite                      | - | - |
| <b>PEXT_S</b>               | Piciarelli | PEXT          | sulfur                                                          | 94.6 | 17-Jan-19 | Sulfur                                            | - | - |
| <b>G19_aranew</b>           | Piciarelli | G19, mud vent | orange-brownish encrustation                                    | 84.1 | 24-Jan-19 | Mascagnite, alunogen, Zaherite, Amorphous.        | - | - |
| <b>G19_red</b>              | Piciarelli | G19, mud vent | reddish encrustation                                            | 84.1 | 24-Jan-19 | Titanium oxide, Amorphous.                        | - | - |
| <b>L100 ara</b>             | Piciarelli | L100          | orange-brownish encrustation, southeast L60                     | -    | 24-Jan-19 | Alunogen, Voltaite, Coquimbite, Zaherite, Gypsum. | - | - |
| <b>L60-polla1</b>           | Piciarelli | L60           | whitish substratum for algae, wall of the hole, top part        | 40   | 06-Feb-19 | Alunite, Amorphous                                | - | - |
| <b>L60-polla2</b>           | Piciarelli | L60           | whitish substratum for algae, wall of the hole, lowermost part  | 40   | 06-Feb-19 | Natroalunite, Opal, Amorphous                     | - | - |
| <b>L1wall incrostazione</b> | Piciarelli | L1 wall       | fissure with algae on which granular encrustation occurs        | 34   | 06-Feb-19 | Alum-(K)                                          | - | - |

|                              |            |               |                                                               |      |           |                                                                 |   |   |
|------------------------------|------------|---------------|---------------------------------------------------------------|------|-----------|-----------------------------------------------------------------|---|---|
|                              | Piciarelli |               | brownish film on whitish substratum with algae, greenish part |      |           | Potassium Ammonium Aluminum Sulfate Hydrate, Alunite, Amorphous | - | - |
| <b>PEXT_parte verde</b>      |            | PEXT          |                                                               | 34   | 06-Feb-19 |                                                                 |   |   |
|                              | Piciarelli |               | brownish film on whitish substratum with algae, brown part    |      |           | Alunite, Sulfur, Amorphous.                                     | - | - |
| <b>PEXT_parte marroncina</b> |            | PEXT          |                                                               | 34   | 06-Feb-19 |                                                                 |   |   |
|                              | Piciarelli |               | brownish film on whitish substratum with algae, white part    |      |           | Alunite, Amorphous.                                             | - | - |
| <b>PEXT_parte biancastra</b> |            | PEXT          |                                                               | 34   | 06-Feb-19 |                                                                 |   |   |
| <b>MP</b>                    | Piciarelli | L3 - mud pool | mud decanted water, east side of the pool                     | 88   | 06-Feb-19 | Alunite, Sulfur, Pyrite, Orthoclase, Amorphous, Illite          | - | - |
| <b>L3</b>                    | Piciarelli | L3 - mud pool | water, east side of the pool, crystals from evaporation       | 88   | 06-Feb-19 | Mascagnite, Illite                                              | - | - |
| <b>G19</b>                   | Piciarelli | G19, mud vent | encrustation                                                  | -    | 06-Feb-19 | Alunite, Mascagnite, Voltaite, Zaherite, Amorphous              | - | - |
| <b>L60b acqua</b>            | Piciarelli | L60           | water                                                         | -    | 04-Apr-19 | Mascagnite, Gypsum                                              | - | - |
| <b>L60 acqua</b>             | Piciarelli | L60           | water                                                         | 93.6 | 04-Apr-19 | -                                                               | - | - |
| <b>MP</b>                    | Piciarelli | L3 – mud pool | mud decanted water,                                           | 87.5 | 04-Apr-19 | Alunite, Pyrite, K-feldspar, Amorphous                          | - | - |
| <b>L3</b>                    | Piciarelli | L3 - mud pool | water, of the pool, crystals from evaporation                 | 87.5 | 04-Apr-19 | Mascagnite, Alunogen                                            | - | - |
| <b>MS new</b>                | Solfatara  | new pool      | mushy mud                                                     | 91   | 04-Apr-19 | Alunite, Kaolinite, Pyrite, Amorphous                           | - | - |
| <b>MS</b>                    | Solfatara  | La Fangaia    | mud                                                           | -    | 04-Apr-19 | Alunite, Amorphous                                              | - | - |
| <b>BN</b>                    | Solfatara  | Bocca Nuova   | encrustation                                                  | 136  | 04-Apr-19 | Salammoniac                                                     | - | - |

|           |           |              |              |     |           |                         |   |   |
|-----------|-----------|--------------|--------------|-----|-----------|-------------------------|---|---|
| <b>BG</b> | Solfatara | Bocca Grande | encrustation | 141 | 04-Apr-19 | Mascagnite, Salammoniac | - | - |
|           |           |              |              |     |           |                         |   |   |

Table S2 – Vibration modes and related tentative assignment of functional groups, and mineral attribution for selected samples by DRIFT-FTIR investigations. Alu = alunite, Clay = illite/montmorillonite, Masc = NH<sub>4</sub> - bearing sulfates, am = amorphous, Kao = kaolinite, KAl = alum - (K). ?, uncertain attribution. Note: assignments and attributions are based on mineralogy derived by XRD study and corroborated by EDS-BSEM analyses. Further details in this supplement.

| SOLFATARA MUDS |         |        |                                 |           | PISCIARELLI MUDS |          |          | SOLFATARA NEW HOLE |            |            |                                                   |               |
|----------------|---------|--------|---------------------------------|-----------|------------------|----------|----------|--------------------|------------|------------|---------------------------------------------------|---------------|
| 5/6/16         | 24/7/17 | 1/9/17 | Tentative Assignment            | PH        | 6/16             | 15/11/17 | 14/12/17 | MSnew 5/17         | MSnew 7/17 | MSnew 9/17 | Tentative assignment                              | Phase         |
| 4603           | 4606    | h      | Al-OH                           | Alu       | 4608h            | -        | 4593h    | 4605x              | 4608       | 4613x+4586 | Al-OH                                             | Alu           |
| 4529           | 4528    | x      | Al-OH                           |           | 4518x            | -        | -        | 4523p              | 4525x      | 4525p      | Al-OH                                             | Kao           |
| -              | 4311    | x      | Mg-OH                           | Clay?     | -                | -        | -        | 4308?              | 4307?      | 4307x      | Mg-OH                                             | -             |
| 3973x          | 3975p   | 3980x  |                                 | Alu       | 3971x            | 3976x    | 3973x    | 3976p              | 3980p      | 3976p      |                                                   | Alu           |
| -              | -       | -      |                                 | Clay      | 3629             | 3622     | 3622     | 3694p              | 3695p      | 3695p      | v1OH                                              | Kao           |
| -              | 3692p   | -      |                                 |           | -                | -        | -        | 3668p              | 3666p      | 3667p      | v1OH                                              | Kao           |
| 3587h          | 3620x   | h      | v1OH?                           | Clay?     | -                | -        | -        | 3652p              | 3651p      | 3651p      | v1OH                                              | Kao           |
| 3505p          | 3506p   | 3506p  | v1OH                            | Alu       | 3506p            | 3510p    | 3512p    | 3620p              | 3620p      | 3620p      | v1OH                                              | Kao           |
| 3486p          | 3486p   | 3484p  | v1OH                            | Alu       | 3483p            | 3486p    | 3486p    | 3510x              | 3510p      | 3509x      | v1OH                                              | Alu           |
| 3284h          | 3318h   | 3275h  | v1OH?                           | Clay?     | 3268h            | -        | -        | 3483p              | 3483p      | 3483p      | v1OH                                              | Alu           |
| -              | -       | -      |                                 |           | -                | 3333h    | 3322h    | 3354x              | -          | -          | vOH                                               | KAl           |
| 2338p          | 2339p   | 2337p  |                                 |           | 2340p            | 2338p    | 2338p    | 3006x              | -          | -          | vOH                                               | KAl           |
| 2287           | 2291x   | 2289x  | 2v <sub>3</sub> SO <sub>4</sub> | Alu       | 2285             | -        | -        | 3410-2650H         | 3418-2650H | 3410-2650H | vOH                                               | -             |
| -              | -       | -      |                                 |           | -                | 2289     | -        | 2460h              | -          | -          | vOH                                               | KAl           |
| 2220           | 2223x   | x      | 2v <sub>3</sub> SO <sub>4</sub> | Alu       | 2225h            | -        | -        | 2338x              | 2338p      | 2338x      | -                                                 | -             |
| 2176p          | 2176p   | 2176p  | 2v <sub>3</sub> SO <sub>4</sub> | Alu       | 2175x            | 2178x    | 2176x    | 2290x              | 2291p      | 2288x      | 2v <sub>3</sub> SO <sub>4</sub>                   | Alu           |
| 2119p          | 2117p   | 2116p  | 2v <sub>3</sub> SO <sub>4</sub> | Alu       | 2112p            | 2118x    | 2117x    | 2221x              | 2228x      | 2222x      | 2v <sub>3</sub> SO <sub>4</sub>                   | Alu           |
| 1990p          | 1981x   | 1988p  |                                 | Opal?     | 1997h            | 1985h    | 1980h    | 2176x              | 2177p      | 2176x      | 2v <sub>3</sub> SO <sub>4</sub>                   | Alu           |
| 1870p          | 1872p   | 1873p  |                                 | Opal?     | 1868p            | 1870p    | 1869p    | 2115x              | 2115p      | 2116x      | 2v <sub>3</sub> SO <sub>4</sub>                   | Alu           |
| 1635p          | 1629p   | 1628p  | δHOH                            |           | 1630p            | 1637p    | 1629p    | 1994hx             | 1995hx     | 1991hx     |                                                   | Opal?         |
| 1436x          | 1431p   | 1432x  | v <sub>4</sub> NH <sub>4</sub>  | Masc?     | 1431-00          | 1437p    | 1434p    | 1875p              | 1870p      | 1874p      |                                                   | Opal?         |
| 1215           | 1219x   | 1215h  | Si-O                            | Clay, am? | 1216x            | 1216     | 1219     | 1630p              | 1637p      | 1631p      | δHOH                                              |               |
| 1159           | 1158x   | 1158x  |                                 |           | 1158             | -        | 1156     | 1435p              | 1431p      | 1431p      | v <sub>4</sub> NH <sub>4</sub>                    | Masc?         |
| 1102p          | 1101p   | 1102p  | v <sub>3</sub> SO <sub>4</sub>  | Alu       | 1095p            | 1099p    | 1099p    | 1228p              | 1229p      | 1231p      | v <sub>3</sub> OH+ v <sub>3</sub> SO <sub>4</sub> | Alu, KAl      |
| 1027p          | 1028p   | 1028p  | v <sub>1</sub> SO <sub>4</sub>  | Alu       | 1027p            | 1028p    | 1028p    | 1156x              | 1158x      | 1158x      |                                                   |               |
| 949p           | 943p    | 947p   | AlAlOH                          | Clay?     | -                | -        | -        | 1095p              | 1097p      | 1092p      | v <sub>3</sub> SO <sub>4</sub> , Si-O             | Alu, KAl, Kao |
| -              | -       | -      | AlAlOH                          | Clay?     | 929h             | 934h     | 936h     | 1026p              | 1029p      | 1028p      | v <sub>1</sub> SO <sub>4</sub> , Si-O             | Alu, Kao      |

|      |      |      |                                |          |      |      |      |
|------|------|------|--------------------------------|----------|------|------|------|
| -    | 871p | -    |                                |          | -    | -    | -    |
| -    | 850p | -    |                                | S?       | -    | -    | -    |
| 798p | 801h | 801p | SiO                            | am, clay | 796p | 796p | 793p |
| 682p | 685p | 686p | v <sub>4</sub> SO <sub>4</sub> | Alu      | 680p | 684p | 683p |
| 634p | 636p | 632p | v <sub>4</sub> SO <sub>4</sub> | Alu      | 634p | 631p | 629p |
| 604p | 602p | 604p | γOH                            | Clay     | 601p | 603p | 602p |
| -    | 576x | -    |                                |          |      |      |      |
| 526x | 526  | 527p | Al-O-Si                        | Clay     | -    | 524  | 526  |
| 470x | 469p | 467p | Si-O-Si                        | S? Clay? | -    | 469  | 470  |
| -    | -    | -    |                                |          | -    | -    | -    |

|       |         |          |                                      |              |
|-------|---------|----------|--------------------------------------|--------------|
| 1008x | 1010x   | 1012x    | Si-O                                 | Opal? Kao    |
| 938x  | 939p    | 938x     | OH                                   | Kao          |
| 912p  | 916p    | 915p     | OH                                   | Kao          |
| 795p  | 794p    | 795p     | Si-O                                 | Opal? Kao    |
| 685p  | 688p    | 684p     | Al-O, v <sub>4</sub> SO <sub>4</sub> | Kao, Al, KAl |
| 631p  | 635p    | 631p     | Si-O, v <sub>4</sub> SO <sub>4</sub> | Kao, Al      |
| 601p  | 604p    | 601p     | δOH                                  | Kao          |
| 532p  | 546-529 | 540p     | Al-O-Si                              | Kao, clay    |
| 474p  | 473p    | 481-467p | Si-O-Si                              | Kao, clay    |
| 433p  | 435p    | 432p     | Si-O                                 | Kao          |

Table S3 – Selected whole-rock geochemistry of multi-phases materials sampled at different locations (i.e., sample name as in Fig. 1) within the Pisciarelli and Solfatara areas and at different times. MDL indicates the detection limit for major, trace, C and S contents.

| Name                           | Method | MDL     | MPS0517 | MP      | MSnew   | MS      | L20camino | L1 beije | MS new | MS2    | MP       | L19Geiser | BG      | L3 MP    |
|--------------------------------|--------|---------|---------|---------|---------|---------|-----------|----------|--------|--------|----------|-----------|---------|----------|
| Sampling Date                  |        |         | 31.5.17 | 29.6.17 | 29.6.17 | 29.6.17 | 18.9.17   | 18.9.17  | 1.9.17 | 1.9.17 | 15.11.17 | 14.12.17  | 20.9.16 | 14.12.14 |
| SiO <sub>2</sub>               | ICP-ES | 0.01%   | 49.43   | 38.05   | 49.27   | 49.59   | 15.73     | 3.09     | 48.71  | 72.52  | 59.78    | 63.33     | 80.56   | 56.32    |
| Al <sub>2</sub> O <sub>3</sub> | ICP-ES | 0.01%   | 16.2    | 10.01   | 16.04   | 4.97    | 2.35      | 14.67    | 16.72  | 3.43   | 10.38    | 11.32     | 1.29    | 11.85    |
| Fe <sub>2</sub> O <sub>3</sub> | ICP-ES | 0.04%   | 4.02    | 2.35    | 3.88    | 0.29    | 0.09      | 3.11     | 3.79   | 0.26   | 2.31     | 0.78      | 0.14    | 3.2      |
| MgO                            | ICP-ES | 0.01%   | 0.02    | 0.08    | 0.02    | 0.03    | <0.01     | 0.01     | 0.02   | 0.04   | 0.15     | 0.05      | 0.04    | 0.16     |
| CaO                            | ICP-ES | 0.01%   | 0.08    | 0.14    | 0.08    | 0.08    | 0.02      | 0.05     | 0.07   | 0.09   | 0.25     | 0.03      | 0.07    | 0.3      |
| Na <sub>2</sub> O              | ICP-ES | 0.01%   | 0.18    | 0.24    | 0.18    | 0.13    | 0.03      | 0.03     | 0.2    | 0.11   | 0.34     | 0.07      | 0.02    | 0.42     |
| K <sub>2</sub> O               | ICP-ES | 0.01%   | 3.27    | 2.85    | 3.32    | 1.4     | 0.62      | 2.84     | 3.45   | 0.93   | 3.34     | 3.08      | 0.18    | 3.9      |
| TiO <sub>2</sub>               | ICP-ES | 0.01%   | 0.51    | 0.35    | 0.52    | 0.73    | 0.34      | 0.07     | 0.5    | 0.71   | 0.52     | 0.66      | 2.35    | 0.49     |
| P <sub>2</sub> O <sub>5</sub>  | ICP-ES | 0.01%   | 0.21    | 0.1     | 0.21    | 0.09    | 0.03      | 0.03     | 0.21   | 0.07   | 0.11     | 0.07      | 0.03    | 0.12     |
| MnO                            | ICP-ES | 0.01%   | <0.01   | <0.01   | <0.01   | <0.01   | <0.01     | <0.01    | <0.01  | <0.01  | <0.01    | <0.01     | <0.01   | <0.01    |
| Cr <sub>2</sub> O <sub>3</sub> | ICP-ES | 0.00%   | 0.003   | <0.002  | 0.004   | <0.002  | <0.002    | <0.002   | 0.003  | <0.002 | 0.002    | <0.002    | 0.003   | <0.002   |
| Ba                             | ICP-ES | 1 ppm   | 966     | 952     | 975     | 817     | 401       | 69       | 918    | 677    | 1611     | 967       | 4261    | 1789     |
| Ni                             | ICP-ES | 20 ppm  | <20     | <20     | <20     | <20     | <20       | <20      | <20    | <20    | <20      | <20       | <20     | <20      |
| Sc                             | ICP-ES | 1 ppm   | 4       | 3       | 4       | 3       | <1        | 2        | 4      | 2      | 3        | 4         | 2       | 4        |
| LOI                            | ICP-ES | -5.10%  | 25.8    | 45.6    | 26.2    | 42.5    | 80.7      | 76       | 26     | 21.7   | 22.5     | 20.4      | 14.7    | 22.9     |
| Sum                            | ICP-ES | 0.01%   | 99.8    | 99.89   | 99.8    | 99.89   | 99.96     | 99.94    | 99.8   | 99.9   | 99.87    | 99.86     | 99.8    | 99.86    |
| Be                             | ICP-MS | 1 ppm   | <1      | 1       | <1      | 1       | <1        | <1       | 2      | <1     | 4        | 5         | 2       | 5        |
| Co                             | ICP-MS | 0.2 ppm | 10.6    | 4.2     | 8.3     | 0.7     | <0.2      | 1.4      | 9.3    | 0.6    | 3.4      | 0.4       | 0.6     | 5.7      |
| Cs                             | ICP-MS | 0.1 ppm | 4.6     | 6.4     | 4.6     | 4.5     | 3.3       | 1.1      | 4.3    | 7.3    | 9.8      | 23.4      | 14.5    | 9.3      |
| Ga                             | ICP-MS | 0.5 ppm | 22.5    | 10.2    | 23.8    | 6.9     | 2.1       | 9.5      | 22.7   | 4.2    | 9.1      | 15.6      | 0.8     | 10.7     |
| Hf                             | ICP-MS | 0.1 ppm | 8.8     | 5.1     | 8.6     | 10.2    | 3.3       | 0.8      | 8      | 11.2   | 6.6      | 9.6       | 11      | 6.2      |
| Nb                             | ICP-MS | 0.1 ppm | 44      | 24.6    | 42.6    | 64.7    | 21.9      | 1.9      | 40.8   | 66.5   | 38       | 61.2      | 156.1   | 34.9     |
| Rb                             | ICP-MS | 0.1 ppm | 41.5    | 54.8    | 39.5    | 26.5    | 11.4      | 22.6     | 45.9   | 29.5   | 73       | 75.8      | 26.9    | 83.7     |
| Sn                             | ICP-MS | 1 ppm   | 4       | 3       | 4       | 6       | 3         | <1       | 4      | 5      | 3        | 4         | 20      | 3        |
| Sr                             | ICP-MS | 0.5 ppm | 654.1   | 333.8   | 649.5   | 159.9   | 76.1      | 253.5    | 650.5  | 106.4  | 375.2    | 275       | 80.4    | 449.4    |
| Ta                             | ICP-MS | 0.1 ppm | 2.3     | 1.3     | 2.3     | 3.2     | 1         | 0.1      | 2.3    | 3.3    | 2        | 3.1       | 7.6     | 1.9      |

|              |        |          |       |       |       |       |        |       |       |       |       |       |       |       |
|--------------|--------|----------|-------|-------|-------|-------|--------|-------|-------|-------|-------|-------|-------|-------|
| <b>Th</b>    | ICP-MS | 0.2 ppm  | 26.9  | 13    | 25.1  | 13.2  | 5.5    | 6.7   | 25.3  | 12.7  | 15.5  | 24.5  | 8.4   | 16.3  |
| <b>U</b>     | ICP-MS | 0.1 ppm  | 10.4  | 5.3   | 9.7   | 6.6   | 2.1    | 0.7   | 9.5   | 7.3   | 6.3   | 13.8  | 7.2   | 6.2   |
| <b>V</b>     | ICP-MS | 8 ppm    | 110   | 58    | 102   | 35    | 16     | 21    | 106   | 24    | 59    | 72    | 54    | 65    |
| <b>W</b>     | ICP-MS | 0.5 ppm  | 5.4   | 2.4   | 4.8   | 7     | 2.5    | <0.5  | 4.3   | 8.1   | 4.8   | 5.1   | 18.7  | 3.9   |
| <b>Zr</b>    | ICP-MS | 0.1 ppm  | 406   | 217.4 | 390.5 | 447.8 | 136    | 32.5  | 373.5 | 490.4 | 291.6 | 444.7 | 497.9 | 278.6 |
| <b>Y</b>     | ICP-MS | 0.1 ppm  | 5.5   | 4.6   | 5.5   | 4.4   | 1.3    | 0.5   | 5.4   | 4.5   | 6     | 3.7   | 7.8   | 6.6   |
| <b>La</b>    | ICP-MS | 0.1 ppm  | 74.8  | 31.6  | 69.6  | 24.1  | 12.3   | 24.3  | 71.7  | 16.8  | 37.2  | 46.2  | 11.2  | 40.9  |
| <b>Ce</b>    | ICP-MS | 0.1 ppm  | 123.4 | 50.4  | 116.2 | 36.5  | 20.2   | 35    | 125.1 | 27.5  | 57.9  | 70.7  | 9.8   | 65.3  |
| <b>Pr</b>    | ICP-MS | 0.02 ppm | 12.05 | 4.71  | 11.17 | 3.45  | 1.76   | 2.29  | 12.08 | 2.62  | 5.53  | 5.22  | 0.86  | 5.94  |
| <b>Nd</b>    | ICP-MS | 0.3 ppm  | 38.9  | 13.9  | 36.8  | 11.1  | 4.9    | 4     | 37.5  | 9.3   | 17.4  | 11.9  | 3.3   | 19.3  |
| <b>Sm</b>    | ICP-MS | 0.05 ppm | 5.37  | 2.14  | 5.18  | 1.82  | 0.51   | 0.54  | 5.33  | 1.5   | 2.48  | 1.15  | 0.78  | 2.59  |
| <b>Eu</b>    | ICP-MS | 0.02 ppm | 1.01  | 0.48  | 0.93  | 0.32  | 0.12   | 0.1   | 1.06  | 0.31  | 0.55  | 0.33  | 0.11  | 0.64  |
| <b>Gd</b>    | ICP-MS | 0.05 ppm | 3.1   | 1.44  | 2.96  | 1.15  | 0.39   | 0.25  | 3.15  | 1.04  | 1.64  | 0.94  | 0.97  | 1.75  |
| <b>Tb</b>    | ICP-MS | 0.01 ppm | 0.37  | 0.18  | 0.33  | 0.15  | 0.05   | 0.03  | 0.35  | 0.15  | 0.23  | 0.14  | 0.17  | 0.24  |
| <b>Dy</b>    | ICP-MS | 0.05 ppm | 1.4   | 0.93  | 1.33  | 0.77  | 0.27   | 0.16  | 1.47  | 0.86  | 1.14  | 0.75  | 1.11  | 1.18  |
| <b>Ho</b>    | ICP-MS | 0.02 ppm | 0.21  | 0.17  | 0.2   | 0.17  | 0.05   | 0.02  | 0.19  | 0.18  | 0.22  | 0.15  | 0.26  | 0.26  |
| <b>Er</b>    | ICP-MS | 0.03 ppm | 0.54  | 0.49  | 0.5   | 0.52  | 0.19   | 0.05  | 0.55  | 0.52  | 0.61  | 0.47  | 0.86  | 0.7   |
| <b>Tm</b>    | ICP-MS | 0.01 ppm | 0.08  | 0.07  | 0.07  | 0.07  | 0.02   | <0.01 | 0.08  | 0.08  | 0.09  | 0.05  | 0.15  | 0.11  |
| <b>Yb</b>    | ICP-MS | 0.05 ppm | 0.6   | 0.59  | 0.64  | 0.61  | 0.19   | 0.08  | 0.61  | 0.58  | 0.68  | 0.39  | 0.93  | 0.7   |
| <b>Lu</b>    | ICP-MS | 0.01 ppm | 0.09  | 0.08  | 0.08  | 0.08  | 0.03   | <0.01 | 0.09  | 0.1   | 0.11  | 0.07  | 0.15  | 0.11  |
| <b>TOT/C</b> | LECO   | 0.02%    | 0.14  | 0.14  | 0.16  | 0.58  | 0.25   | 0.09  | 0.14  | 1.25  | 0.21  | 0.14  | 0.46  | 0.15  |
| <b>TOT/S</b> | LECO   | 0.02%    | 8.75  | 31.12 | 8.42  | 24.9  | >50.00 | 16.52 | 8.8   | 10.56 | 10.62 | 4.6   | 2.03  | 11.59 |
| <b>Mo</b>    | ICP-MS | 0.1 ppm  | 2.8   | 0.9   | 3.1   | 1.8   | 0.4    | 0.9   | 2.3   | 1.5   | 1.3   | 1.3   | 1.2   | 1.2   |
| <b>Cu</b>    | ICP-MS | 0.1 ppm  | 12.1  | 9.9   | 16.6  | 16.9  | 1.5    | 2.5   | 13.7  | 11.5  | 7.9   | 6     | 4.9   | 10.6  |
| <b>Pb</b>    | ICP-MS | 0.1 ppm  | 20.9  | 14.8  | 20.3  | 12.9  | 3.9    | 12.7  | 18.1  | 13.4  | 19.9  | 38.4  | 15.9  | 20.1  |
| <b>Zn</b>    | ICP-MS | 1 ppm    | 8     | 14    | 11    | 4     | 4      | 4     | 11    | 6     | 14    | 7     | 32    | 13    |

|           |        |          |      |       |        |        |       |      |        |       |       |       |        |       |
|-----------|--------|----------|------|-------|--------|--------|-------|------|--------|-------|-------|-------|--------|-------|
| <b>Ni</b> | ICP-MS | 0.1 ppm  | 7.8  | 2.8   | 8.6    | 0.2    | 0.3   | 0.8  | 9.1    | 0.7   | 2.6   | 1.3   | 0      | 3.1   |
| <b>As</b> | ICP-MS | 0.5 ppm  | 63.2 | 9.5   | 69.7   | 36.4   | <0.5  | 2.9  | 69.6   | 25.6  | 10.9  | 0.9   | 6806.6 | 12.9  |
| <b>Cd</b> | ICP-MS | 0.1 ppm  | <0.1 | <0.1  | <0.1   | 0.1    | <0.1  | <0.1 | 0.3    | <0.1  | <0.1  | <0.1  | 0.2    | <0.1  |
| <b>Sb</b> | ICP-MS | 0.1 ppm  | 19.9 | 0.2   | 11.7   | 3.5    | 0.1   | <0.1 | 15.2   | 3.5   | 0.2   | 0.2   | 6      | 0.3   |
| <b>Bi</b> | ICP-MS | 0.1 ppm  | 0.5  | 0.3   | 0.7    | 1.2    | 0.1   | 0.3  | 0.5    | 1     | 0.2   | 0.1   | 0      | 0.2   |
| <b>Ag</b> | ICP-MS | 0.1 ppm  | 0.3  | <0.1  | <0.1   | 0.1    | <0.1  | <0.1 | <0.1   | <0.1  | <0.1  | <0.1  | 0.1    | <0.1  |
| <b>Au</b> | ICP-MS | 0.5 ppb  | 12.1 | <0.5  | 4.4    | <0.5   | <0.5  | 1.4  | 0.8    | 4.4   | 0.6   | 1.3   | 334.3  | 0.8   |
| <b>Hg</b> | ICP-MS | 0.01 ppm | 50   | 41.95 | >50.00 | >50.00 | 12.75 | 2.9  | >50.00 | 42.67 | 24.98 | 15.28 | 50     | 33.86 |
| <b>Tl</b> | ICP-MS | 0.1 ppm  | 2.1  | 1.5   | 2.3    | 0.3    | <0.1  | 0.7  | 2      | 0.2   | 1.1   | <0.1  | 0      | 1.7   |
| <b>Se</b> | ICP-MS | 0.5 ppm  | <0.5 | 0.8   | 1.1    | 1.1    | <0.5  | <0.5 | 0.8    | <0.5  | <0.5  | <0.5  | <0.5   | <0.5  |



## Supplementary materials

### 1. Notes on XRDP and FT-IR techniques and spectra

In this work more than 350 samples collected at the solfataric area of the Campi Flegrei caldera, have been examined through X-Ray Powder Diffraction (XRDP). The interpretation of XRDP spectra, corroborated by Electron Microscopy (EDS-BSEM), provided the mineral dataset results. Selected samples have been further investigated through Diffuse Fourier Infrared Spectroscopy (DRIFT-FTIR) with the aim to explore eventual advantage of the technique on our mixtures and the suitability for detection of low abundant phases. Analytical techniques are in the Appendix.

Identification of phases has been obtained through the PANalytical software HighScore version 3.0e, considering the goodness of fit between the XRDP pattern of the unknown sample and those in the JCPDS PDF-2 database. Table S1 lists all the samples and the mineral dataset for the 350 samples representative of the period between 2012 and April 2019. Figure S1 displays representative XRDP spectra obtained on different samples and the peaks intensity of the identified phases. Each panel allows appreciating the comparable patterns obtained from different samples collected at the same sites. In particular, the panels S1a,b show the well-defined XRDP traces obtained on exsiccated water pool samples. The remaining panels illustrate the clays attribution to illite (S1d), kaolinite (S1e) and montmorillonite (S1f) in muds. The clays are usually present in low abundance in the analyzed samples; the La Fangaia muds (Fig. S1c) are the poorest of clays. The presence of the different clay minerals (i.e. illite, montmorillonite and kaolinite) has been established in consideration of the specific reflection lines. Furthermore, although the overlapping X-ray signals from associated clay mineral and amorphous phases, the traces of the intensity peaks in the interval between  $20^\circ$  and  $40^\circ$   $2\theta$  degree suggest a dominance of well-ordered kaolinite (or kaolinite with low defect) in the Solfatara new pool (S1e).

Samples for which the mineral assemblage was preliminary identified by XRDP investigation give reproducible DRIFT-FT-IR spectra (see Fig. S2). Here, we show that the obtained DRIFT-FT-IR spectra can provide interesting information and major details will be obtained in the future if analyzing separated minerals. As matter of fact, we have examined the infrared spectra and we have identified some bands reported in the literature for the identified crystals (Table S2).

The various muds are complex mixtures derived by different mineral assemblages (Table S1, Fig. S1c,d,e,f). These muds always include alunite and it is possible recognizing clear infrared signals in the OH-stretching region attributable to that phase. Alunite produces the major band at  $3483\text{ cm}^{-1}$  coupled with the smaller one at ca.  $3513\text{ cm}^{-1}$  (Fig. S2c,d,e) described in the literature (Clark et al., 1990), also in our relatively complex muddy mixtures. On this basis, when the FT-IR spectra obtained from our muds are compared with those in the USGS database (Clark et al., 2007), other infrared signals of alunite can be revealed (Table S2): i) the peculiar shape of the FT-IR patterns between ca.  $2290$  and  $2110\text{ cm}^{-1}$  with four consecutive bands can be associated with the  $2\text{V}_3\text{SO}_4$  and ii) the band at ca.  $1097\text{-}1100\text{ cm}^{-1}$  of  $\text{V}_3\text{SO}_4$ . The band at ca.  $1025\text{ cm}^{-1}$  that coupled with this later (Toumi and Tlili, 2008) can be further discriminated in some cases.

The XRDP spectra of the Solfatara new pool muds clearly indicate kaolinite and this is an important difference with the other muds containing smectites, and with most of the other samples as well (Fig. S1e vs. Fig. S1c,d). The DRIFT-FT-IR investigations on these kaolinite-bearing samples shows the characteristic shape (Madejova, 2003; Fitos et al., 2015) with two minor bands at  $3667$  and  $3651\text{ cm}^{-1}$  between two major vibrational modes at  $3695$  and  $3620\text{ cm}^{-1}$  (Fig. S2e; Table S2). The presence of all these bands suggests the absence (or paucity) of structural defect of kaolinite (Madejova et al., 2002). The rest of the infrared pattern is not simple because the overlapping signals from alunite and amorphous. Following Madejova et al. (2002), it is possible to reveal three strong bands (i.e.,  $1092\text{-}1097$ ,  $1026\text{-}1029$ ,  $1008\text{-}1012$ ; Table S2) between  $1100$  and  $1000\text{ cm}^{-1}$  (Fig. S2e) that lacks in the smectites-bearing muds and can derive from the kaolinite contribution. In agreement with the authors, the smectite in muds should produce the broad bands at around

1096-1095  $\text{cm}^{-1}$ . Our results confirm the sensitivity of the FT-IR to detect kaolinite into clay mixtures (Madejova et al., 2002).

Otherwise, the DRIFT-FT-IR spectra are not resolute to determine the illite or montmorillonite contribution, particularly when present in low amount into mixtures of clays (Madejova et al., 2002), as in our case. We observe that the Pisciarelli smectite-bearing samples have a few band/hump at around 3620  $\text{cm}^{-1}$  (Fig. S2d) and this band is stronger in illite with respect to montmorillonite (Clark et al., 2007). However, the illite should produce signals between 4260 and 4090  $\text{cm}^{-1}$ . These signals lack also in the infrared spectra of our Pisciarelli mud samples, probably due their small amount of smectites. Nevertheless, in absence of details on clays, we cannot exclude that the flat infrared traces in this region can be indicative of the montmorillonite or the illite/montmorillonite interlayer that characterize several samples (Fig. S1g). The Solfatara muds (Fig. S2c) produced infrared spectra very similar to those of smectites-bearing samples, and in particular display the band at 3620  $\text{cm}^{-1}$ . Although the XRDP spectra of these muds do not present smectites-related peaks (Fig. S1c), the infrared spectra suggest further evaluations.

Evaporates from water collected at the Pisciarelli pools are mixtures of ammonium sulfates and mascagnite is dominant (Fig. S1a, Table S1). The mascagnite has the formula  $(\text{NH}_4)_2\text{SO}_4$  and differently from other phases detected in the studied products (Table S1, 1) for the  $\text{NH}_4$  group. According the literature (Basciano and Peterson, 2007), a sharp, clear band in the 1430-1450  $\text{cm}^{-1}$  range of the infrared spectrum is the most accurate for identifying the  $\text{NH}_4$ -rich samples. This is also verified in ammonio-alunite and ammonio-jarosite series, the general formula of which,  $(\text{K},\text{Na},\text{NH}_4)(\text{Al},\text{Fe})_3(\text{SO}_4)_2(\text{OH})_6$ , differs from our ammonium sulfates (Parafiniuk and Kruszewky, 2010) and in  $(\text{NH}_4)_2\text{SO}_4$  particles (Weis and Ewing, 1996) that approach our mineral chemistry. A band at 1416  $\text{cm}^{-1}$  characterizes the Mascagnite (sample GDS65.a) from the USGS database (Clark et al., 2007). Our mascagnite shows a well-defined infrared spectrum characterized by a sharp band at 1422-1411  $\text{cm}^{-1}$  that is in the region of the  $\nu_4(\text{NH}_4^+)$ . Therein, we observe for other possible band correspondences between our infrared spectra and those reported in the cited literature. The results tabled below

|                           | our sample<br>$(\text{NH}_4)_2\text{SO}_4$<br>( $\text{cm}^{-1}$ ) | Weis and Ewing, 1996<br>$(\text{NH}_4)_2\text{SO}_4$<br>( $\text{cm}^{-1}$ ) | Parafiniuk and Kruszewky, 2010<br>$(\text{K},\text{Na},\text{NH}_4)(\text{Al},\text{Fe})_3(\text{SO}_4)_2(\text{OH})_6$<br>( $\text{cm}^{-1}$ ) | USGS<br>$(\text{NH}_4)_2\text{SO}_4$<br>( $\text{cm}^{-1}$ ) |
|---------------------------|--------------------------------------------------------------------|------------------------------------------------------------------------------|-------------------------------------------------------------------------------------------------------------------------------------------------|--------------------------------------------------------------|
| $\nu_3(\text{NH}_4)$      | 3213-3200<br>3022<br>2870-2877                                     | 3216-3219<br>3050-3062<br>2850                                               | 3340-3100<br>ca. 3100<br>2850-2900                                                                                                              | ca 3198<br>ca 3000                                           |
| $\nu_4(\text{NH}_4^+)$    | 1422-1411                                                          | 1421-1472                                                                    | 1430-1450                                                                                                                                       | 1416                                                         |
| $\nu_3(\text{SO}_4^{2-})$ | 1096                                                               | 1113-1114                                                                    | unclear                                                                                                                                         | 1106                                                         |
| $\nu_4(\text{SO}_4^{2-})$ | 614                                                                | 620-621                                                                      | unclear                                                                                                                                         | 618                                                          |

evidence the bands at 1096  $\text{cm}^{-1}$  and at 614  $\text{cm}^{-1}$  that can be associated with  $\nu_3(\text{SO}_4^{2-})$  and  $\nu_4(\text{SO}_4^{2-})$ , respectively. We also detect the three bands at 3213-3200  $\text{cm}^{-1}$ , 3022  $\text{cm}^{-1}$  and 2870-2877  $\text{cm}^{-1}$  that can be linked to  $\nu_3(\text{NH}_4)$  vibrational modes. Our mascagnite also includes a hump between 2491 and 2045  $\text{cm}^{-1}$  that does not fit the  $(\text{NH}_4)_2\text{SO}_4$  and instead can be detected in the Al-richer ammonio-alunite series where it is attributed to the  $\nu(\text{Al-OH})$  vibrational modes. We infer that the band should derive by small amount of tschermigite with formula  $(\text{NH}_4)\text{Al}(\text{SO}_4)_2 \cdot 12(\text{H}_2\text{O})$  that is common in our samples from Pisciarelli (Table S1).

The XRDP and FT-IR investigations on evaporates are very interesting when compared with their cognate muds. Based on XRDP spectra,  $\text{NH}_4$ -bearing species that characterize waters, seem absent in most of these muds. The muds decanted from the Pisciarelli pools are dominantly mixtures of alunite, pyrite, amorphous, variable amount of primary feldspars and illite/montmorillonite; only few muds present ammonium sulfates at the XRDP. Indeed, at the infrared spectroscopy,

they produced the clear, sharp band at around  $1430\text{ cm}^{-1}$  (Fig. S2d), i.e. in the region of the  $\nu_4(\text{NH}_4^+)$  (Weis and Ewing, 1996; Parafiniuk and Kruszewski, 2010). This is an obvious result and demonstrates that, in some circumstances, FT-IR can be used to detect crystals that due to the small abundance cannot be discriminable at the XRDP. The band also occurs in the Solfatara muds and we are confident on the attribution to the  $\nu_4(\text{NH}_4^+)$  because the absence of other minerals detected in the assemblage that can produce signals at this wavelength.

Native S from two different samples (PINT S tozzo 18/10/17 and PINT S 18/1/18 in Table 1; Fig. S2b) produced DRIFT-FTIR spectra at the wavenumbers  $< 2950\text{ cm}^{-1}$ , with the strongest bands at  $843$  and  $468\text{ cm}^{-1}$  that coincide with those of sulfur in both the USGS (see Sulfur GDS94; Clark et al., 2007) and ruff (<http://ruff.info/>) databases. The spectra differ in the OH stretching region, likely indicating the occurrence of impurities, although water absorption by the KBr solution can be a further possibility.

The FTIR results (not shown) on two samples for which whole-rock geochemistry testifies the richness in carbon (7 to 20 wt% on the total) show bands at  $2850$ ,  $2920$ ,  $1455$  and  $1375\text{ cm}^{-1}$  attributable to C-H ligands (Glamoclija et al., 2004). These results indicate that the FT-IR allows a rapid check for eventual organic groups in samples and corroborate the absence of low to absence of such ligands in samples in Fig. S2.

#### Cited references

- Basciano, L.C., and Peterson, R.C.: The crystal structure of ammoniojarosite,  $(\text{NH}_4)\text{Fe}_3(\text{SO}_4)_2(\text{OH})_6$  and the crystal chemistry of the ammoniojarosite–hydronium jarosite solid-solution series. *Mineral Mag*, 71, 427-441, 2007.
- Clark, R.N., King, T.V.V., Klejwa, M., Swayze, G.A., and Vergo, N.: High spectral resolution reflectance spectroscopy of minerals, *J. Geophys. Res., Solid Earth*, 95, 12653-12680, doi:10.1029/JB095iB08p12653, 1990.
- Clark, R.N., Swayze, G.A., Wise, R., Livo, E., Hoefen, T., Kokaly, R., and Sutley, S.J.: USGS digital spectral library splib06a: U.S. Geological Survey, Digital Data Series 231, <http://speclab.cr.usgs.gov/spectral.lib06>, 2007.
- Fitos, M., Badogiannis, E.G., Tsvilis, S.G., and Perraki, M.: Pozzolan activity of thermally and mechanically treated kaolins of hydrothermal origin, *App. Clay Sci.*, 116–117, 182–192, doi:10.1016/j.clay.2015.08.028, 2015.
- Glamoclija, M., Garrel, L., Berthon, J., and Lopez-Garcia, P.: Biosignatures and bacterial diversity in hydrothermal deposits of Solfatara Crater, Italy, *Geomicrobiol. J.*, 21, 529–541, doi:10.1080/01490450490888235, 2004.
- Madejová, J.: FTIR techniques in clay mineral studies, *Vib. Spectrosc.*, 31, 1–10, doi:10.1016/S0924-2031(02)00065-6, 2003.
- Madejová, J., and Komadel, P.: Baseline studies of the clay minerals society source clays: infrared methods, *Clays Clay Min*, 49, 5, 410-432, 2001.
- Madejová, J., Kečkėš, J., Pálková, H., and Komadel, P.: Identification of components in smectite/kaolinite mixtures. *Clay Min*, 37(2), 377-388, 2002.
- Parafiniuk, J., and Kruszewky, L.: Minerals of the ammonioalunit-ammoniojarosite series formed on a burning coal dump at Czerwionka, Upper Silesian Coal Basin, *Mineral. Mag.*, 74(4), 731–745, doi:10.1180/minmag.2010.074.4.731, 2010.
- Toumi, M., and Tlili, A.: Rietveld Refinement and Vibrational Spectroscopic Study of Alunite from El Gnater, Central Tunisia, *Russian Journal of Inorganic Chemistry*, 53, 1845–1853, 2008.
- Weis, D. D., and Ewing, G. E.: Infrared spectroscopic signatures of  $(\text{NH}_4)_2\text{SO}_4$  aerosols, *J. Geophys. Res.*, 101, 18709-18720.

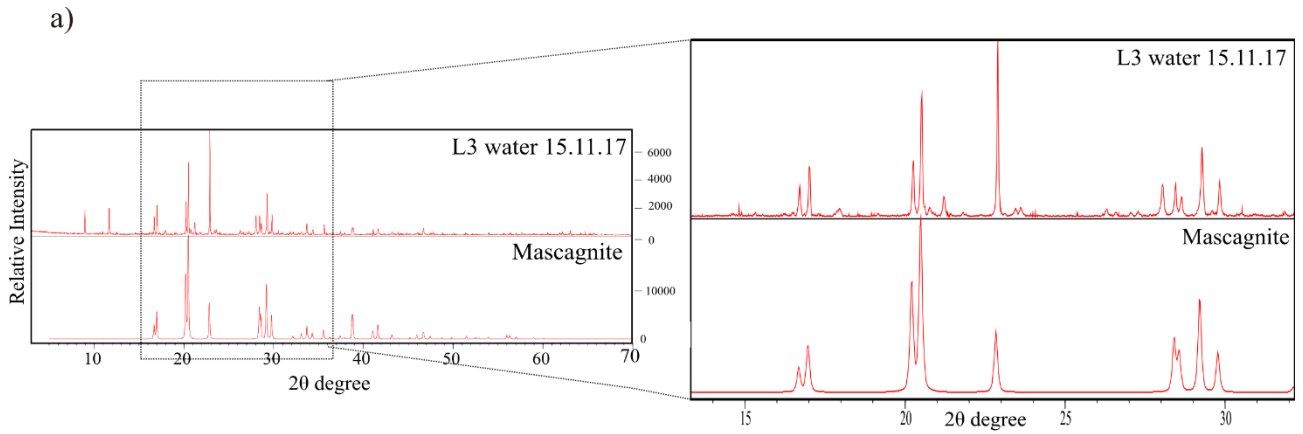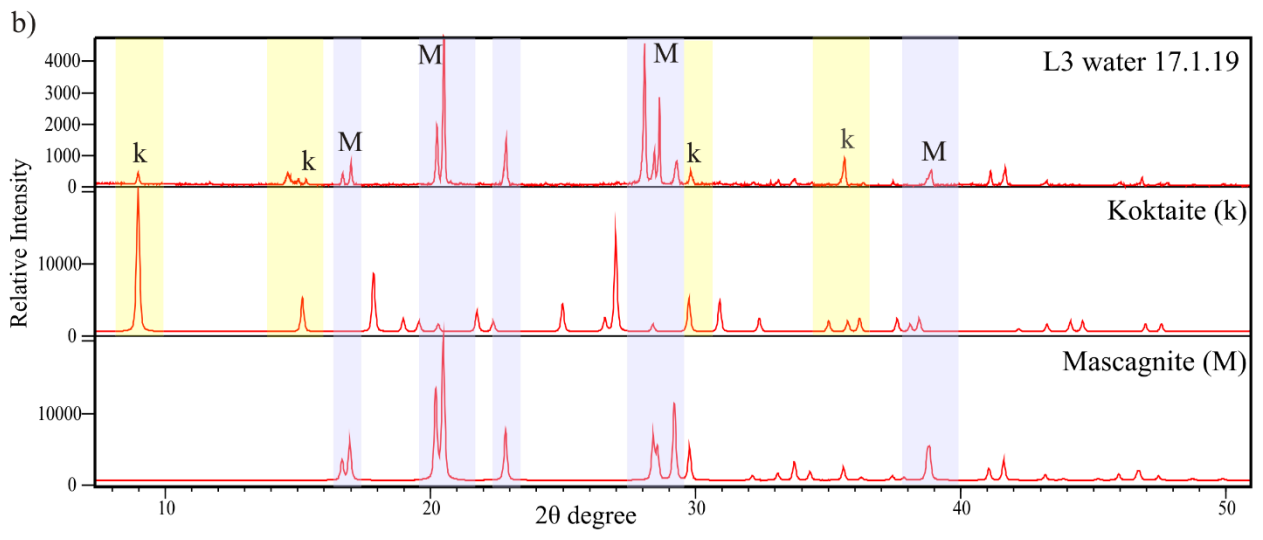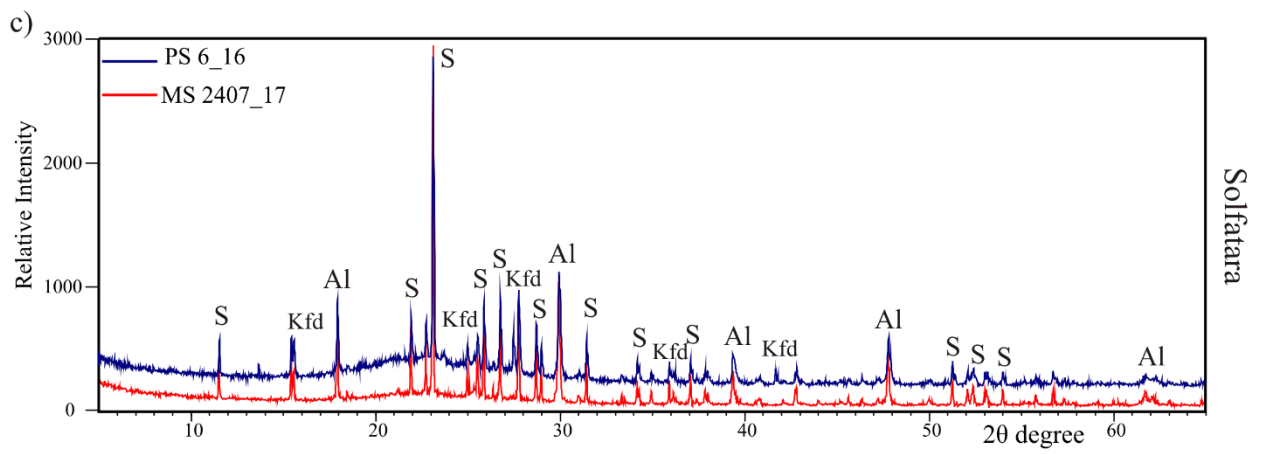

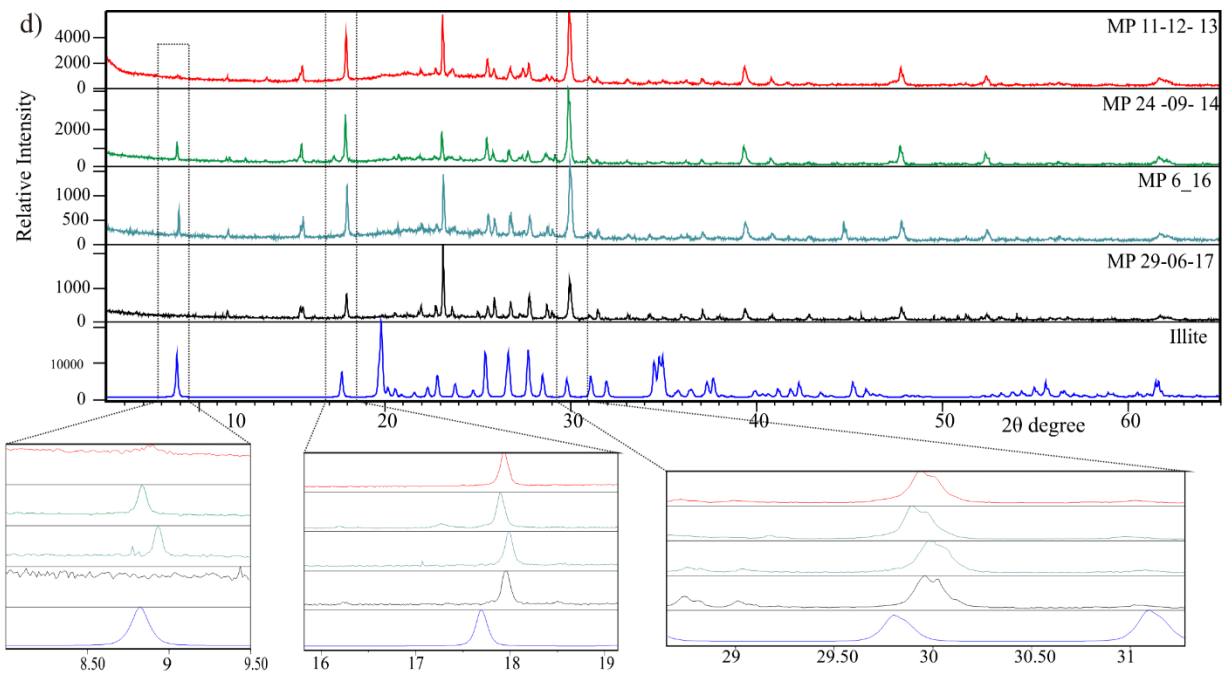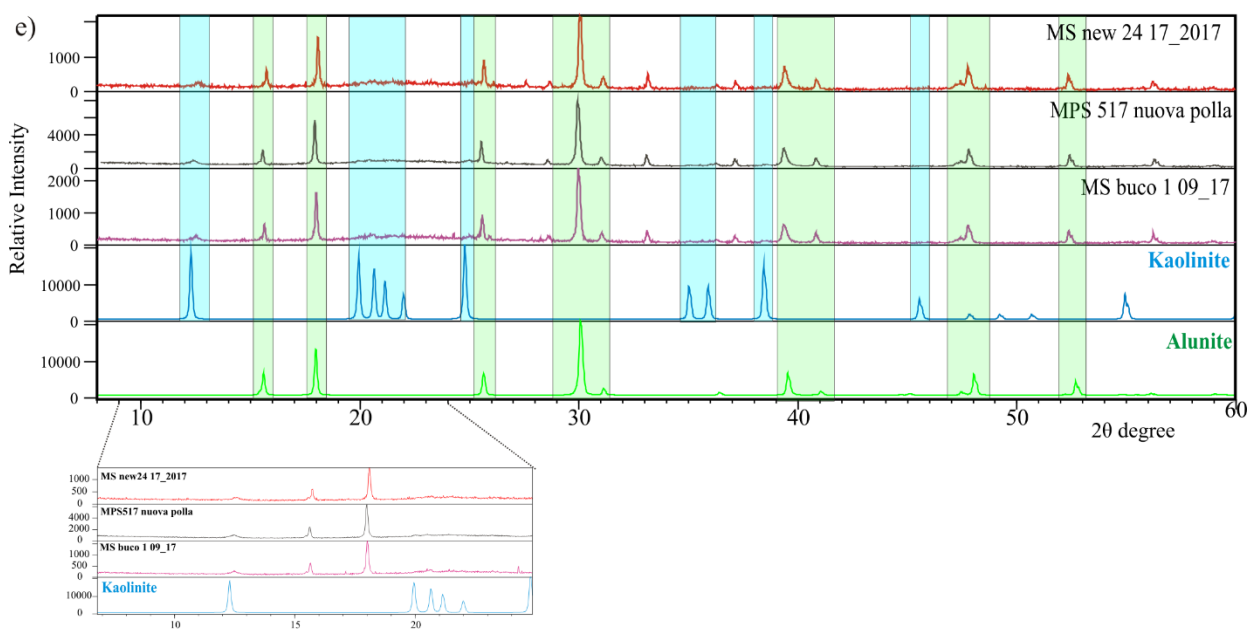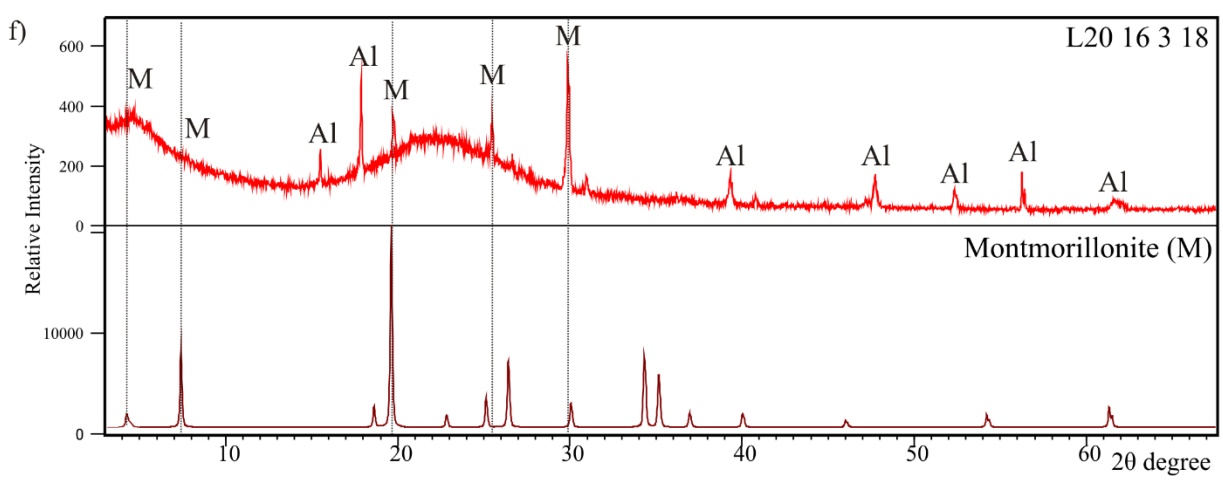

Figure S1 – Representative XRDP spectra of NH<sub>4</sub>- sulfates dominating the assemblage formed from drying the Pisciarelli water (a, b) and of various muds from Solfatara (c,e) and Pisciarelli (d,f). Each panel reports the sample name in Table S1. The muds show the large hump between 18 ° and 30 ° 2θ degree attributed to the amorphous phase. The smaller panels evidence the reflection intensity in the most significant range useful to discriminate illite in d) and kaolinites in e). Some XRDP spectrum has a corresponding infrared spectrum in Fig. S2: the sample with mascagnite is the same of Fig. S2a, the Solfatara muds in c) produced the FT-IR spectra in Fig. S2b, the Pisciarelli mud MP 6\_16 is in Fig. S2d, the samples in e) are the same of Fig. S2e. Abbreviations (c, f): S = Sulfur; Al = Alunite; Kfd =Alkali feldspar.

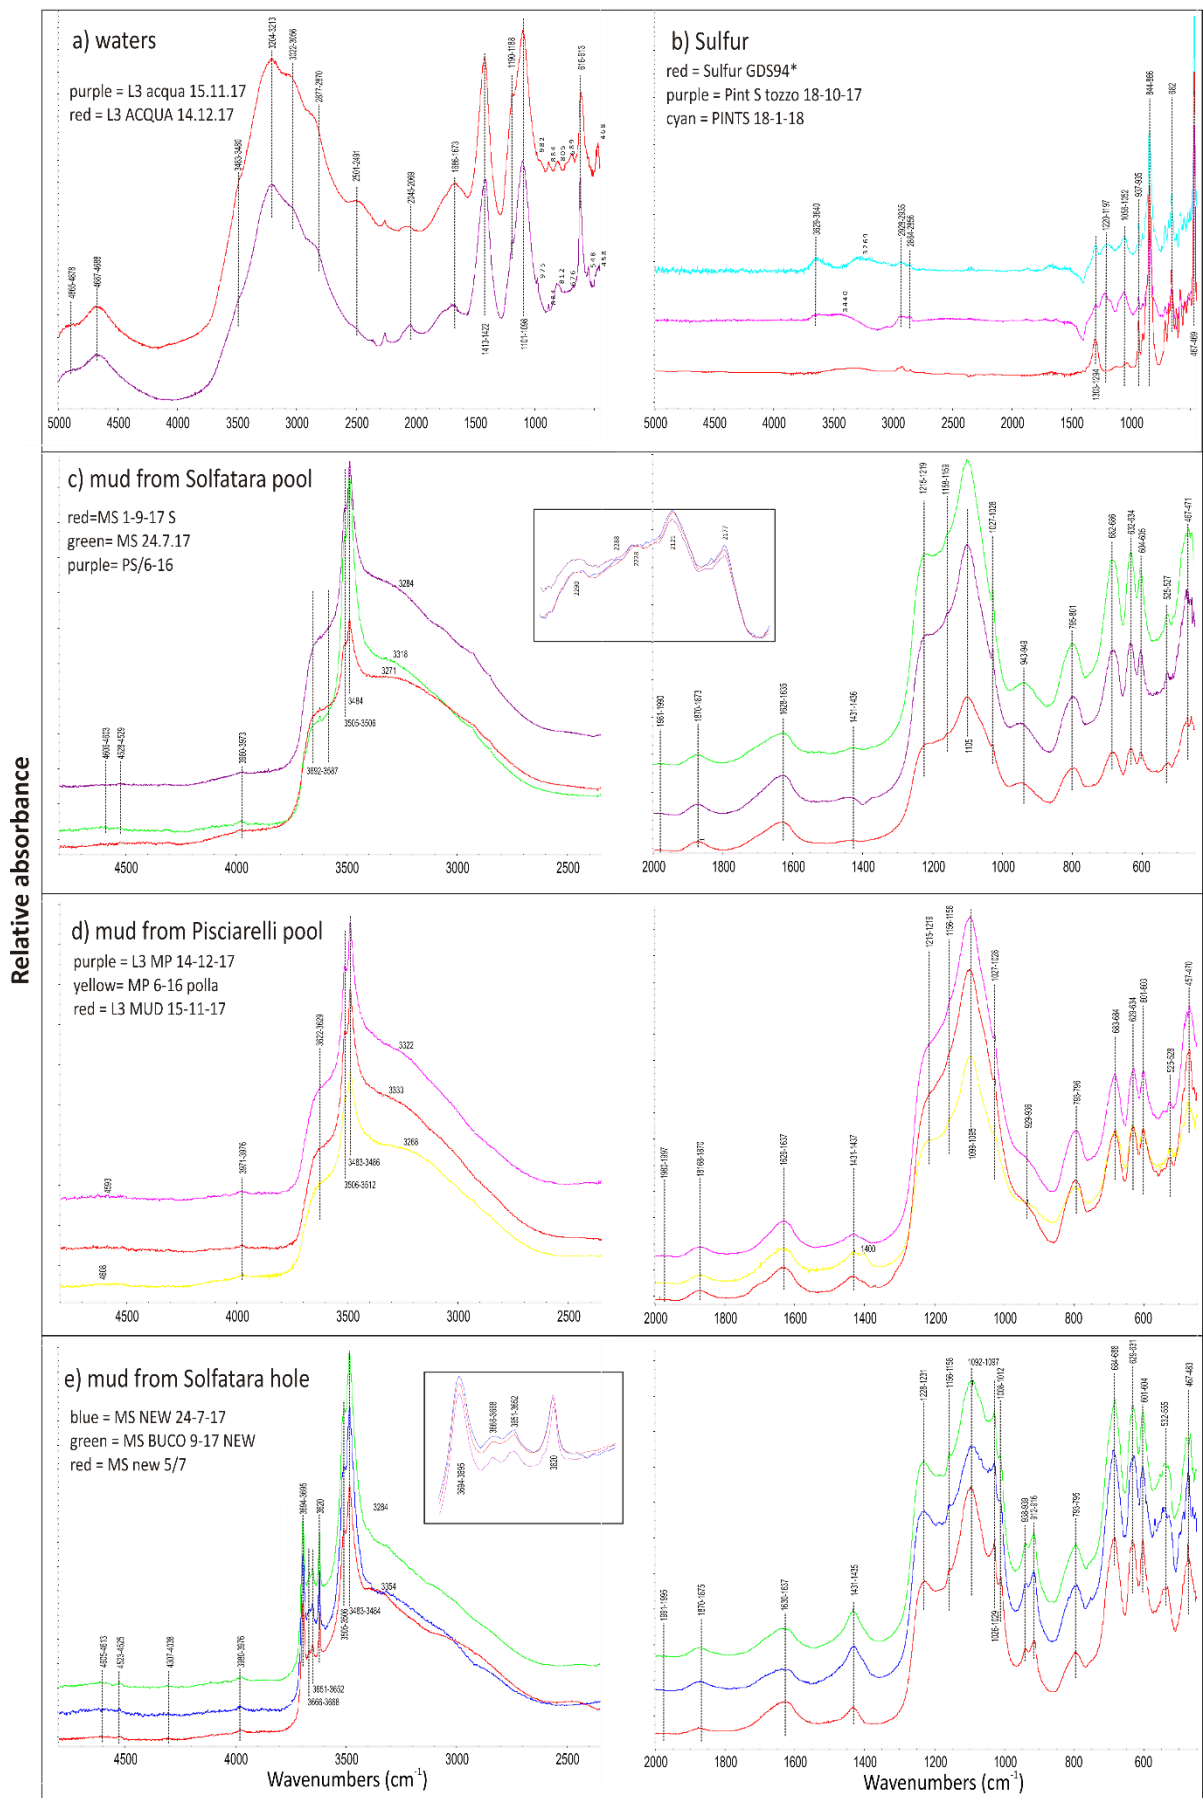

Figure S2 – FT-IR spectra of  $\text{NH}_4$ - sulfates (a), native sulfur (b) and various muds from Solfatara (c), Pisciarelli (d) and the new Solfatara hole (e). See Table S2 for vibrational modes and relative assignments.
