# Supplementary material for: The acid-sulfate zone and the mineral alteration styles of the Roman Puteolis (Neapolitan area, Italy): clues on fluid fracturing progression at the Campi Flegrei volcano
Source: Copernicus journal article supplement (doi:10.5194/se-2019-53), 2019-05-08
Supplement: Supplementary file [file se-2019-53-RC1-supplement.pdf]

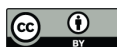

## The acid-sulfate zone and the mineral alteration styles of the Roman Puteolis (Neapolitan area, Italy): clues on fluid fracturing progression at the Campi Flegrei volcano.

Monica Piochi<sup>1</sup>, Angela Mormone<sup>1</sup>, Harald Strauss<sup>2</sup>, Giuseppina Balassone<sup>3</sup>

5 <sup>1</sup>Osservatorio Vesuviano, Istituto Nazionale di Geofisica e Vulcanologia, Naples, I-80124, Italy

<sup>2</sup>Institut für Geologie und Paläontologie, Westfälische Wilhelms-Universität, Münster, 48149, Germany

<sup>3</sup>Dipartimento di Scienze della Terra, dell'Ambiente e delle Risorse, Università Federico II, Naples, I-80134, Italy

*Correspondence to:* Monica Piochi ([monica.piochi@ingv.it](mailto:monica.piochi@ingv.it))

**Abstract.** Active fumarolic solfataric zones represent important structures of dormant volcanoes, but unlike emitted fluids,  
10 their mineralization are omitted in the usual monitoring activity. This is the case for the Campi Flegrei caldera in Italy, among  
the most hazardous and best-monitored explosive volcanoes in the World, where the landscape of Puteolis is characterized by  
acid sulfate alteration that is active at least since Roman time. This paper provides temperature, mineralogical, textural,  
compositional and stable isotope data for those solfataric terrains sampled at the crater and Pisciarelli slope of the Solfatara  
volcano between 2012 and 2019. Temperatures vary between 40 ° and 95 °C. Minerals include alunite with grain sizes  
15 generally larger than 20 µm, alunogen, native sulfur, well-ordered kaolinite, and, common at Pisciarelli, pyrite and NH<sub>4</sub>-  
sulfates. Sulfate terrains have higher contents of Ti, Ba, Au, As Hg and Tl relative to their parent substrate. The Pisciarelli  
slope is anomalous in terms of the presence of NH<sub>4</sub>. δ<sup>34</sup>S values for sulfides and native S range between -3.00 and 0.49 ‰ and  
from -4.42 to 0.80 ‰, respectively. Sulfates show δ<sup>34</sup>S and δ<sup>18</sup>O values in the range of -3.35 to 3.80 ‰ and between 0.3 and  
20 31.33 ‰, respectively. The style of mineralization and the stable isotope geochemistry do produce complex and not completely  
consistent classifications and genetic information. We merge our data with volcanological information, data from exploration  
drillings and geophysical results. With the conceptual model we suggest a series of shallow and deep aquifers interconnected  
like “communicating vessels” through a main fault system that downthrows Solfatara with respect to Pisciarelli. Fluid outflow  
from the different discrete aquifers hosted in sediments – and possibly bearing biological imprints – is the main dataset that  
allows determination of the steam-heated environment with a supergene settings superimposed. Supergene conditions and  
25 high-sulfidation relicts, together with the narrow sulfate alteration zone buried under the youngest volcanic deposits, point to  
the existence of a paleo-conduit. The data will contribute to monitor and evaluate the volcanic hazards.



## 1 Introduction

Active solfataric landscapes are among the most peculiar and fascinating environments on the Earth that reappraise as planetary analogues (e.g., White and Hedenquist, 1990; Rye et al., 1992; Lowe et al. 1993; Zillig et al., 1996; Ciniglia et al., 2005; Rye, 2005; Glamoclija et al., 2004; Sgavetti et al., 2008). Their peculiarity arises from the stringent interaction between inorganic (mineral assemblages and geochemistry) and organic (biota) substances under extreme ambient conditions (pH, temperature, salinity, oxygen deficiency, etc) associated with endogenous degassing (i.e., H<sub>2</sub>O, CO<sub>2</sub>, CH<sub>4</sub>, H<sub>2</sub>S, SO<sub>2</sub>, HCl, HF) and hot water fluid circulation (hydrothermal/geothermal systems) on dormant volcanoes. They allow investigating a variety of processes in the field of geology (i.e., magma and volcano dynamics), biology (i.e., physiological adaptation to environmental stresses and the origin of the life), medicine, astrology and archaeology (i.e., thermal bath and antibacterial applications), with possible future medical and biotechnological applications.

The Solfatara volcano (Campi Flegrei, CF, Italy; Fig. 1a) is perhaps the most famous and hazardous geothermal solfataric setting in the World (e.g., Rittmann, 1950; Rosi and Sbrana, 1987; De Vivo et al., 1989; Barberi et al., 1991; Piochi et al., 2014) with exploration since Greek times up to Medieval age (e.g., Photo-Jones et al., 2016). The solfataric mineral neogenesis received limited discussion in the recent literature (Cortecci et al., 1978; Valentino et al., 1999; Piochi et al., 2015; Russo et al., 2017). By contrasts several studies relate to bradyseism phenomena that concern with seismicity, ground deformation and outgassing (e.g., Corrado et al., 1976; Barberi et al., 1984; Chiodini et al., 2016; Cardellini et al., 2017; Moretti et al., 2017), life in these environments (e.g., Zillig et al., 1996; Glamoclija et al., 2004; Sgavetti et al., 2008), and a continuous interest into the thermal bath and medical care (e.g., Photo-Jones et al., 2016; Giacomelli and Scandone, 2012).

This paper focuses on the solfataric mineral assemblages updating our previous research (Piochi et al., 2015) and presenting the result of our progressing work on the CF solfataric volcano. Results derive from temperatures determination contextually to sampling, investigations by Optical Microscope (OM), X-Ray Powder Diffraction (XRDP), Electron Microscopy (EDS-BSEM), Diffuse Fourier Infrared Spectroscopy (DRIFT-FTIR), whole-rock geochemistry (WRG) and stable isotope geochemistry (SIG) of sulphur and oxygen. By merging new and published information (Celico, 1986; Guglielminetti, 1987; Rosi and Sbrana, 1987; Chiodini et al., 1988; Celico et al., 1992; Aiuppa et al., 2006; Caliro et al., 2007; Piochi et al., 2014; Di Giuseppe et al., 2017; Moretti et al., 2017), we reflect on the significance of the sulfate alteration zone and related volcanological implications.

## 2 Background

### 2.1 Geological setting

The Solfatara volcano (Fig. 1a,b,c) displays impressive and powerful hydrothermal activities with hot fumaroles, thermal springs, mud pools and diffuse degassing (Allard et al., 1991; Valentino et al., 1999; Chiodini et al., 2001; Valentino and Stanzione, 2003; 2004; Chiodini et al., 2010; Piochi et al., 2015; Cardellini et al., 2017; and references therein). The

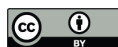

hydrothermalism intensely altered the faulted volcano slopes (Rosi and Sbrana, 1987) and the solfataric landscapes (Fig. 1a-e) have replaced the original pyroclastic sequences (e.g., Agnano Monte Spina, Astroni and Solfatara tephra) and lavas (Monte Olibano, Solfatara cryptodome) younger than 5 ka (e.g., Di Vito et al., 1999; Piochi et al., 2005).

The study area is located at Puteolis, the area of maximum ground uplift (in excess of 3 m) and seismicity (more than 16,000  
5 low-magnitude earthquakes), activated during the unrest episodes in 1970 ÷ 1972 (Corrado et al., 1976) and in 1982 ÷ 1984, namely “bradyseisms” (Barberi et al., 1984), that is slowly on-going (e.g., Bodnar et al., 2007; Chiodini et al., 2016; Moretti et al., 2017).

The solfataric area has been exploited for centuries for its alum occurrences (Photo-Jones et al., 2016 and references therein). The intense mining in Roman and Medieval times modified their original context (Photo-Jones et al., 2016): the Pisciarelli  
10 gorge-valley was a quarry, while caving activity exposed the eastern (the Monte Olibano inner wall) and northern flanks of the Solfatara volcano, and rehash deposits in the crater floor.

Old pictures and descriptions (Sicardi, 1959) suggest that the most evident manifestations along the SE and NE rim remain roughly the same: 1) the main Bocca Grande fumarole (Fig. 1a,d) with various exhalative branches northward along the morphological heights; 2) the minor fumarolic vents around the stuffs and 3) the mud pools (Fig. 1a,b,c,d,e). Also, the thermal  
15 spring in Pisciarelli (Fig. 1a,b,e), known as the “Bulla”, i.e., the bubbling one, was known at least since Medieval periods (Photo-Jones et al., 2016). Moreover, the same descriptions indicate the presence of a lake in the Agnano Plain (Fig. 1a). According to Ventriglia (1942), the lake extended up to the slope base of the Solfatara volcano and had a maximum depth of 15 m; drillings recovered related sediments (de Vita et al., 1999). Ventriglia (1942) also high temperatures in the lake preventing fish from living. Today, the area shows several mud pools and thermal springs, while some (“de Pisis” and  
20 “Sprudel” springs in the Terme of Agnano; Fig. 1a) disappeared, although high temperatures can be still detected.

At present, ground waters nearby Solfatara are rich in  $\text{Cl}^-$  and  $\text{SO}_4^-$  (Aiuppa et al., 2006). Temperatures at the fumaroles exceed 160 °C (e.g., Cardellini et al., 2017; Gresse et al., 2017), in agreement (or locally lower respect) with measurements reported by Sicardi (1959) in the range of 141-215 °C at Bocca Grande and of 99-110 °C at other sites, between 1921 and 1951. Pisciarelli waters exhibited temperatures mostly around 95 °C with minimum values of 84 °C between 1978 and 1999 (Celico,  
25 1992; Valentino and Stanzione, 2004). A geiser-like vent at Pisciarelli has a temperature of up to 116°C (Chiodini et al., 2016). Only, the mud pool (“La Fangaiia”; Fig. 1a,d) was hotter in the past with values up to 100 °C (Sicardi, 1959). Author describes a mud vent in the SE area of the crater that is no longer present.

Emitted gases include  $\text{H}_2\text{S}$ ,  $\text{CH}_4$ ,  $\text{N}_2$ ,  $\text{H}_2$ ,  $\text{CO}$ , in addition to the dominant water vapour and the secondary abundance of  $\text{CO}_2$  with reaching a flux of at least 1500 tonnes/day and a maximum value of 3000 tons/day (Allard et al., 1991; Aiuppa et al.,  
30 2013; Chiodini et al., 2016). Previous studies further report a Hg flux between 0.9 and 4.5 g/day (Ferrara et al. 1994; Bagnato et al., 2014), a detectable (very low) abundance of gaseous  $\text{SO}_2$  (Ferrara et al. 1994; Aiuppa et al., 2013), the occurrence of light hydrocarbons (Capaccioni and Mangani, 2001), and the presence of As and Hg (17 - 5200  $\mu\text{l}$  and 1 - 30  $\mu\text{l}$ , respectively; Valentino and Stanzione, 2003) in the pools and waters. High  $\text{NH}_4$  concentrations are described for waters at Pisciarelli (Martini et al., 1991; Celico et al., 1992; Valentino and Stanzione, 2003), but understanding of the nitrogen source and cycling

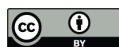

at the Phlegraean area, showing a unique isotopic composition with  $\delta^{15}\text{N}$  at  $6.3 \pm 0.3 \%$  (Chiodini et al., 2010), remains elusive.  $\delta^{18}\text{O}$  and  $\delta^2\text{H}$  of emitted fluids are in the range  $-5$  to  $-0.5 \%$  and between  $-30$  and  $-20 \%$ , respectively (Caliro et al., 2007). The average  $\delta^{34}\text{S}$  value of  $\text{H}_2\text{S}$  gases is  $-0.3 \pm 0.3\%$  (Allard et al., 1991).  $\delta^{34}\text{S}$  values determined for shallow subsurface sulphur-bearing minerals range between  $-5.5$  to  $0.0\%$ , while the deep-seated pyrite has values from  $3.3$  to  $7.4\%$  (Piochi et al., 2015).  $\delta^{18}\text{O}$  values for alunite are from  $4.2$  to  $7.0\%$  (Piochi et al., 2015). The pH is neutral to acid, with values  $<2$  around the pools (Valentino and Stanzione, 2003; 2004; Gresse et al., 2017).

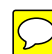

## 2.2 Sampling and analytical techniques

Sampling was conducted within the Solfatara crater and in the Pisciarelli and Cinofilo areas (Fig. 1a,d,e) with additional sites compared to Piochi et al. (2015); the crater floor, except the pool, was intentionally avoid because of the rehash in historical time (Photo-Jones et al., 2016) that is though at the origin of not natural mineral alteration covering. This study intends to enlarge the dataset on the acid sulfate alteration zone of the Phlegraean area, in order to understand the quiescent dynamics of the volcano. Similar observations and data are also available for Ischia island (Piochi et al., 2019) that belong to the Phlegraean Volcanic District (Piochi et al., 2005).

Our new collection is, therefore, widening the observation period on the Puteolis sulfate area that now spans between January 2013 and January 2019 (Table S1). Selection of sampling sites is based on variable macroscopic features including degassing “magnitude”, tectonics and fracturing evidences, mineral occurrences and exhalative vents locations, as visible in the field and described in the literature (Allard et al., 1991; Ferrara et al. 1994; Valentino and Stanzione, 2003; Aiuppa et al., 2013; Bagnato et al., 2014; Chiodini et al., 2016). A thermo-couple digital probe 51/52 II by Fluke with precision of  $\pm 0.3 \text{ }^\circ\text{C}$  was used to measure temperature on the field, contextually to sample collection.

Samples were air-dried for several days to one week. Subsequently, these were studied under the Optical Microscope (OM) in order to define their general mineral assemblages. Where possible, the various S-bearing phases (or enriched portions) were handpicked for subsequent isotopic analyses. Figures 2 and 3 show the appearance of most representative samples.

Both bulk-rocks and separated phases were crush in an agate mortar for X-Ray Powder Diffraction (XRDP), Diffuse Fourier Infrared Spectroscopy (DRIFT-FT-IR) and Whole-Rock Geochemistry (WRG). Scansion Electron Microscope (BSEM), Electron Diffuse System (EDS) and Stable Isotope Geochemistry (SIG) used aliquots of bulk materials and isolated mineral phases. Appendix A reports details for analytical techniques.

## 3 Results

### 3.1 Mineral data by OM, XRDP, BSEM, DRIFT-FT-IR results

New and previously published (Piochi et al., 2015) mineralogical data for the Solfatara-Pisciarelli area (Table S1, Table 1) provide information on a yearly to monthly basis since 2013 along with measurements of temperature.

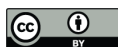

Through time, K, Al sulphates (alunite) and native S (Fig. 3a,b,c,d,e,f) are the main and widely distributed secondary mineral phases associated to surface degassing. Alunogen and pyrite (Fig. 3a,b) are second in abundance. All these mineral phases can form single phase concretion or coexist in up to mm-sized grains. Alunogen often – if not generally – associates with alunite and occurs in two distinct morphologies (Fig. 3a,d,e). Most commonly, it consists of fibrous tangled masses of white crystals. 5 Where coexisting, alunogen fibres grow from the edges of alunites (e.g., sample L100 zucc in Table 1; Fig. 3d). This appearance seems usual along the fault scarp, north of the pool (L1 site, Fig. 1e). Secondly, alunogen has thin, platy crystal habits (Fig. 3b,d,e). Many of these crystal groups show rounded to corroded edges suggesting alteration after crystallization (Fig. 3e). Dendritic and/or sometimes bi-pyramidal native sulfur (Figs 2a,3a,3c) crystallites are ubiquitous habits (typically sampled at L1, SMO, some places along ASA, Stuff in Fig. 1d and Table 1) that mostly cluster within the alunitic surface and 10 the rock voids (Fig. 2c). Along the fracture, S may form a yellow ductile patina (L1 vent, BG, BN in Fig. 1d,e and Table 1). Locally (PINT, PEXT, L19, L20, L60 in Fig. 1e and Table 1), S produces encrustations with pale yellowish fibrous-like texture (Fig. 2b).

Pyrite (Fig. 2d) occurs as smaller ( $\leq$ mm-sized) rhombododecahedral grains (Fig. 3a) or as fine-grained mineral uniformly coating other components (i.e., feldspars, lava, etc.; Figs 2d,3i). It has a particular high abundance within the Pisciarelli muds 15 (Figs 1e,2d), i.e., both within the main pool where it could reach cm-sizes and in the Geysir emission. The blackish colour of the muds should also derive from the pyrite abundance. Pyrite also occurs around the degassing areas. Barite can be further detected at Pisciarelli.

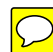

Clays are mostly smectite (based on FT-IR probably illite/montmorillonite, this is used hereafter), while kaolinite seems least abundant (Table 1S, Table 1). Illite/montmorillonite usually occurs in the mud at Solfatara and occasionally in the muds at 20 Pisciarelli (from Geysir and around other emissive vents; Table 1). Kaolinite characterizes the newly formed pool within the Solfatara crater and occurs locally at Pisciarelli (Fig. 1c,d,e and Table 1).

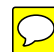

Other efflorescent phases (Fig. 3c,i) occur randomly. Rarely, Al, Fe sulphates (halotrichite) have been identified nearby the Pisciarelli Geysir as crust-like aggregates. Na and NH<sub>4</sub> sulphates determine the pale orange painting on efflorescences and encrustations. Sulphates, bearing Na, Ca, Mg are least common, and represent a peculiar occurrence in the new Solfatara mud. 25 Alum has been detected at Pisciarelli.

Air-dried evaporation of water sampled at the Pisciarelli pool resulted in the precipitation of mascagnite, tschermigite, and letovicite (Fig. 2e,f and Table S1, Table 1). Figure 3i shows the euhedral tschermingite that coexists with native S in the sample L30 eff-blocchetto (Table S1, Table 1). Instead, evaporation of Solfatara mud pool water produced alum, as documented already in the Medieval and Roman times (Photo-Jones et al., 2016). Water from the Stufe di Nerone (west side not shown in 30 figure) crystallized halite.

Realgar and ammonium chloride (Fig. 3g,h) appears as peculiar precipitates at the Bocca Grande site (Fig. 1d).

Accessory minerals include hematite, quartz, and, possibly, Fe-hydroxides, hydro-biotite and phlogopite.

Furthermore, amorphous phases are largely present at various sites (Table S1, Table 1), particularly, in muds and in the samples from Bocca Grande and L1 vent (Fig. 1d,e). The widespread amorphous phases could correspond to material from the both



original volcanic rock and alteration. General assumptions (Piochi et al., 2015; Montanaro et al., 2017) indicate amorphous silica, although it merits a more rigorous examination.

Finally, Fe-oxide, and fresh to variably altered feldspar and biotite are the most common primary volcanic mineral phases.

DRIFT-FTIR spectra collected on selected samples (Fig. 4) produce data consistent with XRD results and furthermore allow

5 useful details on structure and eventual minor phases or impurities. Table S2 lists the relevant vibration modes of spectra and

the proposed mineral assignments. The crystals formed by evaporation of water in the Pisciarelli pool (Fig. 4a), as described by Parafiniuk and Kruszewky (2010), show a sharp peak at 1422-1411  $\text{cm}^{-1}$  that can be attributed to the  $\nu_4(\text{NH}_4^+)$ . Therein, the three bands at 3213-3200  $\text{cm}^{-1}$ , 3022  $\text{cm}^{-1}$  and 2870-2877  $\text{cm}^{-1}$  can be linked to  $\nu_3(\text{NH}_4)$  vibrational modes and the humps between 2491 and 2045  $\text{cm}^{-1}$  at  $\nu(\text{Al-OH})$  vibrational modes.

10 Native S from two different samples (PINT S tozzo 18/10/17 and PINT S 18/1/18 in Table 1; Fig. 4b) is evident in the DRIFT-FTIR spectra at  $< 2950 \text{ cm}^{-1}$ , with the strongest peaks at 843 and 468  $\text{cm}^{-1}$  that coincide with those of sulfur in the both the USGS (see Sulfur GDS94; Clark et al., 2007) and ruuff (<http://ruuff.info/>) databases. The spectra differ in the OH stretching region, likely indicating the occurrence of impurities, although water absorption by the KBr solution can be a further possibility.

15 As expected (Clark et al., 1990), alunite can be determined through its major peak at 3483  $\text{cm}^{-1}$  coupled with a smaller one at 3513  $\text{cm}^{-1}$  in the OH-stretching region (Fig. 4c,d,e). Accordingly, the spectra show a small peak at ca. 4605  $\text{cm}^{-1}$  from the Al-OH bend also ascribed to alunite. Furthermore, it is possible recognizing the doublet mode at 1088 ÷ 1099  $\text{cm}^{-1}$  and at 1028 ÷ 1025  $\text{cm}^{-1}$  (Toumi and Tlili, 2008) and the mode at 3971 ÷ 3978  $\text{cm}^{-1}$  (see USGS database; Clark et al., 2007) from alunite. However, in the OH-stretching region there are some other vibrations. Based on Madejová and Komadel (2001), illite is likely

20 producing the vibration at 3622 ÷ 3629  $\text{cm}^{-1}$ .  
Notably, the DRIFT-FTIR spectra of muds from Pisciarelli (Fig. 4d) show a vibration at 1430  $\text{cm}^{-1}$  related to the  $\text{NH}_4$  (Parafiniuk and Kruszewski, 2010). The shape of IR spectra in the 2400 ÷ 2000  $\text{cm}^{-1}$  range can, therefore, corresponds to the  $2\nu_3\text{SO}_4$  bands as well as the  $\nu\text{Al-OH}$  modes.

The new pool at Solfatara characterizes for peculiar DRIFT-FTIR spectra in the OH-stretching region (Fig. 4e; note the inset)

25 due the presence of kaolinite, alunite, S, feldspar and amorphous phases. Specifically, these are i) alunite (Clark et al., 1990) with a major peak at 3483  $\text{cm}^{-1}$  coupled with a smaller one at 3510  $\text{cm}^{-1}$ , and ii) kaolinite (Madejová, 2003) with two minor peaks at 3667 and 3651  $\text{cm}^{-1}$  between two major vibrational modes at 3695 and 3620  $\text{cm}^{-1}$ . Accordingly, the spectra show vibrations at ca. 4605  $\text{cm}^{-1}$  ascribed to the Al-OH stretch in alunite; furthermore, it is possible recognizing the OH-deformation at ca. 915 and 938  $\text{cm}^{-1}$ , the Si-O stretch at 1008 and 1026  $\text{cm}^{-1}$ , and the Al-OH bend at 4523  $\text{cm}^{-1}$  from kaolinite.

30 The four vibration modes of kaolinite in Fig. 4e point for a well-ordered mineral structure (Madejová, 2003; Fitos et al., 2015). The lack of bands at 4255 and 4081  $\text{cm}^{-1}$  supports the presence of montomorillonite (Clark et al., 1990; Madejová, 2003).



### 3.2 Stable isotopes of sulfur and oxygen (SGI)

A new set of  $\delta^{34}\text{S}$  and  $\delta^{18}\text{O}$  values for sulfur-bearing minerals is listed in Table 2.  $\delta^{34}\text{S}$  values of sulfides and native S range between -3.00 and 0.49 ‰ and between -4.42 and 0.80 ‰, respectively. Sulfates are characterized by  $\delta^{34}\text{S}$  and  $\delta^{18}\text{O}$  values ranging from -3.35 to 3.80 and from 0.3 to 31.33‰, respectively. Temporal variations in  $\delta^{34}\text{S}$  for different sulphur-bearing phases at the different locations, reveal dominantly negative signature, regardless of their mineralogy, with native S showing the most negative values (Fig. 5).

The new sulfur isotope results are generally comparable with literature values for Campi Flegrei (Piochi et al., 2015), although studies earlier than 2000 (Cortecci et al., 1978; Valentino et al., 1999) also present positive  $\delta^{34}\text{S}$  values (Fig. 5a,b). In comparison to previous studies:

- 1) our new S-isotope data for Pisciarelli also include few positive values (Fig. 5b,c).
  - 2) the new O isotope values for sulfate are the highest obtained until now (Fig. 5d). To note, the muds generally have the least heavy oxygen, with except for the 2013 - 2014 data for which O-isotope determinations are lacking. The diagram also indicates a lowering in  $\delta^{34}\text{S}$  for neoformed minerals reported later than 2000.
  - 3) the sulfides at Pisciarelli show  $\delta^{34}\text{S}$  values mostly at 0 ‰ (Fig. 6).
  - 4) the different sites display a homogeneous range in  $\delta^{34}\text{S}$  (Fig. 5abc); however, the variability for the ASA and L1 sites reflects different sample heights along slope (Fig. 1d) and wall (Fig. 1e), respectively.
  - 5) a likely appearance of positive correlation between S isotopes from pyrite and sulfate phases coexisting at Solfatara, with two from the 1994 data outside the trend (Fig. 6a).
  - 6) new isotope data for sulfate reveal a difference compared to studies older than 1990 and the most recent one (Fig. 7).
- In addition, the  $\delta^{18}\text{O}$  values for sulfates at Pisciarelli show a slight tendency to increase with morphological elevation at the sampling site. Specifically, the highest values generally occur at Solfatara that is at > 96 m asl while Pisciarelli lies at 66 - 74 m asl.

### 3.3 Content of major and trace elements (WRG)

Table S3 reports the whole-rock geochemical compositions of selected samples. As expected, samples are highly hydrated and sulfur-rich, due the OH-group and/or S in the crystalline network (see ideal formula in Table 1), and/or S in the analysed sample. LOI can be up to 80 wt% (sample L20 camino 18.9.17), although most commonly at 20-30 wt%, and the S content is up to more than 50 wt%. Carbon is generally low (< 1.25 %), and always < 22 %. Notably,  $\text{SiO}_2$  content is highly variable. Depending on the sample mineralogy, it can be as high as 70-80 wt%. Also, MnO is always < 0.1 wt%.

With respect to the local volcanic rock substrate (Table S3; Fig. 8a), some lithophile elements (Si, Al, P, Sc, Ti, V, Zr, Ba, Yb, Th, Hf) are comparable or depleted (for examples, Be at < 1-5 ppm vs > 4 ppm, Ga < 23.8 ppm, Rb < 95.6 ppm, Y < 8.1 ppm). Depletion concerns with Na, Mg, K, Ca, Rb, Eu, U content. Only Ba displays a significant level of enrichment reaching very high values up to thousands of ppm. Cs shows concentrations of up to tens of ppm. Siderophiles and chalcophiles ratios (Fig.



8b) mostly lies at 1 or slightly above, with depletions for Fe, Zn, Ga, and enrichments for S, Au, As, Tl, Hg (Table S3). Sb can be higher than the primary rock composition.

## 4 Discussion

### 5 4.1 Environmental realms: stationary phenomena and rain off processes

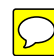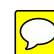

Throughout the years, the various Solfatara and Pisciarelli sampling sites display a nearly constant mineral alteration assemblage (Table 1). Commonly, the mineral neogenesis variably develops on sub-mm- to dm- to m- scales, in relation to the outgassing dynamics, runoff, weather conditions, outcropping substrate, and anthropogenic activity.

Based on mineralogical, geochemical and stable isotope data, we propose the existence of major mineralogical realms, in which some (minor/peculiar) phases can appear or disappear, in response to changing physical-chemical conditions. Such constancy is revealed when comparing results reported by Sicardi (1959) (see Geological setting at 2.1 section) with the present results, corroborating the existence of respecting “stationary” realms. The only exception is the mud pool in the crater.

The Pisciarelli and Solfatara pools (Fig. 1d,e) are the two major and distinctly different realms. They displays persistent differences in dynamics, temperature and mud (solute plus water) mineralogy. The main pool at Pisciarelli shows vigorous boiling (Fig. 1b,e), with temperatures ranging from 63.9 to 94.3 °C (Tables S1 and 2) and a relative dominance of water vapour. The mud is typically grey in colour, bearing ashy to sandy up to mm-sized elements, with generally rounded/smoothed grains as a function of the boiling vigour and material supply from the nearby slopes. On the other hand, the main Solfatara pool is characterized by quite degassing with a temperature at around 49 °C (Tables S1 and 2). The mud is beige and fine, always with a smelly odour. We recurrently detected an enrichment in pyrite and feldspar at Pisciarelli and in native

sulfur+illite/montmorillonite at Solfatara. The latter is enriched in As, Hg, Nb, W, Zr, Sb and depleted in Sr, Ba, Co compared to the original deposits (Fig. 8). Sulfides and sulfates display nearly similar  $\delta^{34}\text{S}$  values at Solfatara, whereas they are distinctly different at the Pisciarelli mud pool (Fig. 6a, inset). The DRIF-FTIR spectra of muds from Pisciarelli, in contrast to those from Solfatara, restituted the vibration at 1430  $\text{cm}^{-1}$  related to the  $\text{NH}_4$  (Parafiniuk and Kruszewski, 2010). Notably, the La Fangaia mud pool (Fig. 1d) is likely cooling as Sicardi (1959) reported up 100 °C, several tens of degrees higher than at the present (Tables S1 and 2). A slightly cooling can be also supposed by our measurements (Table S1) with respect those in the literature (Martini et al., 1991; Celico et al., 1992; Valentino and Stanzione, 2003). In contrast, the Pisciarelli area should be hot, although only by a few degrees celsius (Tables S1 and 2) if compared with increasing temperature values at the geiser-vent (Chiadini et al., 2016).

The PINT-PEXT realm (Fig. 1e) - an isolated anthropogenic morphological height – is composed of an alunitic-rich low-cohesive reddish terrain with a temperature around 95 °C, typically comprising kaolinite (Tables S1 and 2). The kaolinite is easily discriminated by DRIFT-FTIR spectra (not shown) that point for a well-ordered structure. This terrain bears variably sized (up to few dm) clasts and is subject to slumping and sinking.





A hole up to 2-3 m depth opened 180 m North from the main pool within the crater in May 2017 and represents a distinct realm. A grey viscously boiling mud fills the hole (Fig. 1c,d), with a minimum temperature of 70 °C. The mud is pyrite free and dominated by native sulfur, similar to Solfatara mud (Tables S1 and 2). However, kaolinite is the main clay mineral in the new pool (Fig. 4e, note the inset). Mud geochemistry reveals peculiarly high concentrations of Sr, Ga, Co, Th, V, REE, Sb (Fig. 9).

Finally, a rather broad realm includes the other various sampling sites that are characterized by encrustations of alunite with a well-defined, although relative large, range of  $\delta^{34}\text{S}$  values between ca. -4 and 1 ‰ (Tables S1,2; Fig. 5c). These occurrences reflect the nearby presence of vapour degassing. We suspect that those along the ASA, M. Olibano and Stuff slopes of the Solfatara crater (Fig. 1a,d) are long-lived encrustations; further investigations are useful to ascertain this suspect. The minor fumarolic vents around the Stuffs seem unchanged in respect to the description by Sicardi (1959), particularly showing the occurrence of native S and a comparable temperature at around 95 °C. These show variable bulk-rock geochemical compositions.

Widespread alunite formation reflects the potassium and feldspar-rich rock substrate on which they develop (see Piochi et al., 2014 and references therein).

Vapour effluents around the various Geisers/vents at Pisciarelli are the most important factors that influence the alunite alteration realm. Here, a gorge-like morphology favours humidity conditions that decrease subsequent to wetting resulting in the formation of a variety of Na and  $\text{NH}_4$  sulphates. We detected those phases around the pool as desiccation during the dry period. The  $\text{NH}_4$  ions were present in the solution and, possibly, as droplets in the humid air, as revealed by experimental desiccation tests of the water. Aerosol particles from inside and nearby the Solfatara crater that bear  $\text{NH}_4^+$  (and  $\text{Cl}^-$ , possibly in the form of  $\text{NH}_4\text{Cl}$ ) as major ion (Mather et al., 2004), as well as the  $\text{NH}_4\text{Cl}$  inside the BG orange-yellow encrustation (Fig. 3h,i), furthermore support the widespread presence of ammonium species. Notably,  $\text{N}_2$  is emitted at the main intra-crater fumarole of Bocca Grande (see Chiodini et al., 2010). DRIFT-FTIR spectra (Fig. 4d), however, point to the presence of  $\text{NH}_4$  at Pisciarelli, but not at Solfatara (except for BG). Alum – (K) has also been found in relation to the wet conditions at Pisciarelli. Vapour effluent outflow and wetting generation are dependent on atmospheric pressure and wind conditions.

So that, it is likely the meteoric weather the main cause for appearance to disappearance (and vice versa) of some phases. This is also particularly evident for the PINT, PEXT, L19, L20 (Fig. 1e) and the SMO, ASA, Stuff (Fig. 1d) realms that may typically present bipyramid and/or fine dendritic sulfur crystallites (Fig. 2a). Their crystallization seems to be favoured by relatively strong exhalations and porous terrain (PINT, PEXT, L19, L20; Fig. 1e) or conditions where gases remain briefly trapped (SMO, some places along ASA, Stuff; Fig. 1d). Respective conditions also prevail in close proximity (< dm scales) to the main fumaroles (L1 vent, BG, BN; Fig. 1d), where sulfur forms a cream-like patina reflecting the condensing gas flow along the host fractures and fissures.

However, native S disappears during run off and we have macroscopically tested at several places that re-crystallization needs one-to-two months, if not longer (i.e., sample L20 camino; Fig. 1e).



Furthermore, periods of intense rainfall determine the areal extent and depth of the mud pools, the generation of secondary mud vents and the erosion in Pisciarelli and its periodic water puddle. Sicardi (1959) also described the occurrence of mud vents and black mud pools following rainy periods. Notably, pools at Pisciarelli are supported by anthropogenic embankment. Al, Fe sulphates (halotrichite) have been rarely found nearby the Pisciarelli Geiser (Fig. 1e; Tables 1,S1).

- 5 The distribution of sulfates appears irregular, and this should be an object of future investigations.

#### 4.2 Classification of alteration and genetic environments: the contradictory informative data

The style of mineralization (Arribas, 1995; Sillitoe, 1993; Ercan et al., 2016) and the stable isotope results (Rye et al., 1992) allow classification of alteration and the differentiation of genetic environments. Table 3 summarizes characteristic mineralogical, lithological and isotopic features of these environments, in comparison to observations made at the study sites.

- 10 Several contrasting interpretations can result from the data.

Alunite plus kaolinite and **montmorillonite** form in steam-heated environments at 100 to 160 °C where fumarolic vapour condenses above the boiling zone of nearly neutral-pH, H<sub>2</sub>S-rich fluids representing a low sulfidation environment.

- Nevertheless, alunite shows grain sizes in the range of 50 to 100 µm (Fig. 3a,e,f), unlike the finest (<20 µm) ones detected in high-temperature (>40-50 °C) steam-heated (Simón et al., 2005) or supergene (Arribas, 1995) environments. Those coarser sizes usually occur in low-temperature steam-heated (and hypogene, as well) environments (Hedenquist et al., 2000), or could directly crystallize from a SO<sub>2</sub>-rich magmatic vapour that rapidly ascent through fractures (namely high sulfidation setting; Rye et al., 1992; Stoffregen and Alpers, 1992). The evidence of K-feldspar replacement by alunite (Piochi et al., 2015), the disseminated pyrite and the presence of native S at Pisciarelli apparently support the high sulfidation - magmatic hydrothermal environment (Rye et al., 1992). Indeed, sampling temperature are higher than 40 °C (Tables 2 and S1) and SO<sub>2</sub> is rare or absent (Aiuppa et al., 2013) at Campi Flegrei. Also, the lack (or rare detection) of the lower temperature (< 40 °C), disordered polymorphs (i.e., halloysite) point to limited supergene alteration.

Only, the alunite coexisting with kaolinite in the new hole pool has the finest grain sizes. Accordingly, the XRDP and DRIFT-FTIR analyses of CF samples point to slightly ordered kaolinite forms that usually occurs at temperatures < 150 °C in epithermal systems (Sillitoe, 1993), but could also represent a metastable form in hotter settings (Zotov et al., 1998).

- 25 However, when considering litho-geochemical parameters, schematic diagrams further produce contrasting visions. For example, following Ercan et al. (2016), the clay-bearing muds can be ascribed to various supergene to hypogene alteration field in the binary diagram of immobile Zr vs. TiO<sub>2</sub> (Fig. 9a). They also have high (above 1,000 ppm) Ba+Sr and low (<200 ppm) Ce+Y+La concentrations (Fig. 9b).

- The stable isotope geochemistry of minerals support an interpretation as steam-heated to supergene environment (Fig. 7). S-isotope equilibrium occurs between sulfides and sulfates, with reliable re-calculated temperatures in high-sulfidation environments (Arribas, 1986). In contrast, this equilibrium cannot be accounted at Campi Flegrei and any reliable temperatures result because of S-isotope fractionation between sulfates and H<sub>2</sub>S. In fact, δ<sup>34</sup>S values of alunite and pyrite roughly overlap. Instead, sulfur-H<sub>2</sub>S and sulfides-H<sub>2</sub>S at the sampling temperature reflects equilibrium S-isotope fractionation: the theoretical



$\delta^{34}\text{S}$  value of dissolved  $\text{H}_2\text{S}$  fluid is between -3.84 and -0.84 ‰ (Allard et al., 1991). This also implies that the sulphate altered rocks are not magmatic hydrothermal in origin, in agreement with the lack of typical mineral phases that show high oxidation state of S ( $\text{SO}_2$ -rich, high-sulfidation according to Henley and Ellis, 1983). Based on Rye et al. (1992)  $\text{SO}_2$  disproportionation results in the formation of  $^{34}\text{S}$  enriched  $\text{H}_2\text{SO}_4$  and  $^{34}\text{S}$ -depleted  $\text{H}_2\text{S}$ . In addition, the intense Al-leaching in a high sulfidation system is not typical for the Campi Flegrei setting (Fig. 8; Table 3).

Actually, Campi Flegrei lacks of the occurrence of enargite and luzonite, both diagnostic for high-sulfidation environments, and instead shows minor occurrences of realgar and orpiment (AsS), as well as cinnabar (HgS) (Tables 1, S1).

Significantly lower  $\delta^{34}\text{S}$  values (< 15 ‰) for alunite can derive from: (i) the isotopically light sulfur isotopic composition of  $\text{H}_2\text{S}$  during boiling (steam-heated or low-sulfidation setting), (ii)  $\delta^{34}\text{S}$  of primary sulfides (supergene) or (iii) the bulk sulfur isotope composition of magmatic steam (Rye et al., 1992). The first possibility could partly account for the isotopic composition of alunite-pyrite and alunite- $\text{H}_2\text{O}$  pairs (Fig. 10), although contrasting with conclusions based on texture, mineral assemblage and bulk-rock geochemistry (Table 3). The presence of kaolinite in the subsurface, under an alunitic cover and the occurrence of argillic alteration at depth suggest a vertical zonation at the Solfatara crater and, following Rye et al. (1992), a steam heated setting.

Furthermore,  $\delta^{34}\text{S}$  values for the pyrite- $\text{H}_2\text{S}$  pairs further support a supergene setting (Fig. 10).

Finally, we are not able to directly identify any microbial sulphur cycling, although FT-IR and rock geochemistry corroborate can indicate absence or limited biota contribution. Yet, some higher  $\delta^{34}\text{S}$  and  $\delta^{18}\text{O}$  values for sulfates could be indicative, particularly considering the dry-wet alternating conditions.

### 4.3 Merging information and unravelling the setting

Merging all available information, it appears that observations reflect the evolving conditions that follow the last magma intrusion and eruption.

The solfataric alteration zone has a strongly limited extent within the central sector of the Campi Flegrei caldera. It coincides with the area of eruptive vents (e.g., Mt. Olibano, Accademia, Solfatara; Fig. 1a) and uplift of the most recent period of volcanism (Di Vito et al., 1999). The zone appears to be limited under the later Fossa Lupara and Astroni vents, while degassing and thermal aquifers occur within the caldera. However, there is an indication for their discrete, more than their continuous distribution, both across the caldera and through depth (Guglielminetti, 1986).

The studied deposits are young and nearly coeval (<5000 years) with the altered volcanic basement deposits (i.e., Monte Olibano, Solfatara).

The alteration zone locally presents high Ti, Ba, Au, As Hg, Tl concentrations relative to the parent lithology (Fig. 8).

The zone also appears anomalous in terms of its ammonium content. Therefore, we here adopt ammonium as a possible tracer, but we have no information yet about the various contributing sources for the N-species and the cycling of nitrogen at the local scale. The presence of  $\text{NH}_4$ -sulfates is particularly abundant at Pisciarelli; those sulfates systematically form in the evaporated water, very probably in relation to the abundance of nitrogen species (0.2-1 g/l) in those waters (Martini et al., 1991; Celico,



1992; Valentino et al., 1999; Holloway and Dahlgren, 2002; Valentino and Stanzione, 2003; 2004; Aiuppa et al., 2006). Actually, the  $\text{NH}_4^+$  content in the Phlegraean waters is generally low ( $<0.03$  g/l; Martini et al., 1991; Celico, 1992; Valentino et al., 1999; Valentino and Stanzione, 2004; Aiuppa et al., 2006). Yet, Mather et al. (2004) measured a significant abundance of ammonium chloride particles/aerosols at the Solfatara crater. Some realgar encrustations sampled at BG on 2018 also include  $\text{ClNH}_4$  (Table S1; Fig. 3h,i).

The concentration of some metals and metalloids requires sources different from the parent basement. Anthropogenic contributions are obviously possible (Alloway, 2012), e.g. when considering that  $\text{NH}_4$  is generally attributed to agricultural (i.e., fertilizer) and urban soils. However, Hg and As have been detected in the main fumaroles with similar concentrations today and in the last century (Ferrara et al. 1994; Bagnato et al., 2014).  $\text{NH}_4^+$  emissions are also present at Solfatara (Chiodini et al., 2010), although ammonium is of limited importance inside the crater waters literature data  $<0.001$  g/l (Aiuppa et al. 2006) and crystallization of alum instead than  $\text{NH}_4^+$ -sulfates in the water from Solfatara pool.

High concentrations (20-100 g/l) of ammonium are reported in the deeper ( $>500$  m; Carlino et al., 2012) aquifers at the Mofete wells, located on the western side of the Campi Flegrei (Chiodini et al., 1988). Those deeper aquifers are located within a sequence of tuffs and marine sediments also drilled by the CF23 well (1000-1200 m depth; Piochi et al., 2014; 2015), i.e. nearby the solfataric area.

In summary, we propose an environmental setting that merges all collected information (Fig. 11). Fluid outflows from discrete aquifers hosted in sediments – **and bearing biological imprints – feed the Pisciarelli site giving its ammonium peculiarity.**

Marine strata and volcano-clastic sequence intercepted by deep drillings (San Vito1, Mofete and CF23 wells; Rosi and Sbrana, 1987; Piochi et al., 2014) and palustrine deposits (de Vita et al., 1999) encountered in shallow boreholes are **the key sediments.**

**Respective sediments** are located in the central sector of the caldera (Fig. 11), nearest to the study area. Results from cluster analysis of resistivity, P-wave velocity and density parameters, from Pisciarelli across the Solfatara crater (Di Giuseppe et al., 2017) lithologically constrain the model section. These authors highlights a sudden uprise up to ca. 1500 m depth of buried rocks through a tectonic structure just beneath Pisciarelli. The dislocated rocks are the fossiliferous marine and volcano-clastic sequences drilled across the caldera. The deep aquifer is represented by a confined body with a high electrical conductivity ( $\log\rho = 0.97$   $\Omega\text{m}$ ). At the deepest position in the model, we correlate thermo-metamorphic rocks with the brines characterized by  $\log\rho$  at 2.7  $\Omega\text{m}$ ,  $V_p = 3800$  m/s and  $\Delta\sigma -38.8\text{kg/m}^3$ . These physical features are indicative for the occurrence of voids/fracturing and the migration of gases. Therefore, we infer a deep source of gases emitted at the surface, which likely also indicates the location of the heat source.

Shallow and deeper aquifers are interconnected via a network of “communicating vessels” through a fault system, allowing deeper and shallower water to mix and being expelled at Pisciarelli. This justifies an apparent persistence of thermal springs around the Agnano Plain also in presence of the desiccating lake described by Ventriglia (1942). It also supports the depth of the water table, being at a higher topographic position in the Solfatara area in respect to the surroundings (Astroni, Bruno et al., 2007).



In the model, we further speculate that the acid-sulfate alteration zone at the Campi Flegrei is actually evidence of a paleo-conduit. In so, the texture of the mineral assemblage, the enrichment in some metals and the lithogeochemical parameters are relict of a “high-sulfidation system”.

At present, a steam-heated (or low-sulfidation) environment (as derived by most isotope data on alunites; see previous section) is developing in relation to the presence of aquifers and their chemical compositions. This is in agreement with previous studies (e.g., Aiuppa et al., 2017; Piochi et al., 2015; Gresse et al., 2017). Following Hedenquist and Lowensten (1994), this is also in agreement with the shift in  $\delta^{18}\text{O}$  at constant  $\delta^2\text{H}$  values of the emitting fluids (Caliro et al., 2007). Based on the  $\delta^{18}\text{O}$  values of alunite, the recalculated environmental temperature is  $\leq 200$  °C (Fig. 8, inset a).

Furthermore, the presence of  $\text{NH}_4^+$  is considered strictly connected to the surface environment and likely to biological processes (Jaffe, 2000), which is consistent with S-isotope values of pyrite- $\text{H}_2\text{S}$  pairs, the heavier  $\delta^{34}\text{S}$  values suggesting the suggesting microbial sulfur cycling and the supergene environment that is locally developing.

## 5 Conclusions and Outlook

The acid sulfate alteration zone at Pisciarelli and Solfatara is located in the sector of the Campi Flegrei caldera that was the most volcanically active area in the last 5 ka. The alteration zone includes discrete realms with very constant mineralogy, temperature and chemistry, considering the studied time interval. Outgassing dynamics, weather conditions, and runoff are the most important factors affecting the mineral neogenesis at the variable sub-mm- to dm- to m- scales.

Neogenesis includes alunite, alunogen, native sulfur, pyrite, kaolinite and subordinately mascagnite.

The limited areal extent of the alteration zone, its mineralization texture and style, the  $\delta^{18}\text{O}$  and  $\delta^{34}\text{S}$  values of S-bearing minerals, and the enrichment in Ti, Ba, Au, As Hg and Tl, are possibly attributes of the evolution of a paleo-conduit. The zone is anomalous in terms of the presence of  $\text{NH}_4^+$ . These features result from the mixing between waters that overflow through a fault system intercepting discrete aquifers supplied by surface water and deep fluids. Most of the alunite forms above the water table at a temperature  $\leq 200$  °C. At present, the dominant steam-heated environment coexists with local supergenic conditions. Based on presently available data, the following key aspects await further investigations:

A detailed survey of the distribution of aquifers in the subsurface will foster our understanding of caldera dynamics and contributes to the debate existing between as “hydrothermal” (Moretti et al., 2017) vs. “magmatic” (Cardellini et al., 2017) unrest. Assessing the composition and spatial extent of aquifers - also including the contribution from rain fall - is crucial in solving the non-magmatic role into processes at the surface. Soluble acid components ( $\text{SO}_2$ , HCl and HF) sourced at depth are condensing in the shallower aquifer system (Valentino and Stanzione, 2003; Aiuppa et al., 2007; Caliro et al., 2007; Vaselli et al., 2011; Piochi et al., 2014; 2015; Chiodini et al., 2016). However, the ability to buffer these magmatic fluids clearly depends on the water availability in relation to the volume of fluid, with implications on the sourced magma volume(s) evolving/degassing at depth. On the other hand, the circulation of fluids in the subsurface, sourced from both the downward surface infiltration and the ascent of deep fluids, would contribute to the pressurization that is evident through shallow



seismicity as previously suggested (Saccorotti et al., 2007; D’Auria et al., 2011; Di Luccio et al., 2015). Most important, knowing the water availability in the subsurface is crucial for evaluating the volcanic hazard in an area dominated by phreatomagmatic events, such as the Campi Flegrei caldera (Rosi and Sbrana, 1987; Di Vito et al., 1999).

What cause the presence of  $\text{NH}_4^+$  is still rather elusive. Based on Moretti et al. (2017), it appears useful for evaluating the temperature-dependence of  $\text{N}_2$  vs. ammonia production and the relative role of hydrothermal vs. magmatic systems. We add the possible role of bacteria and atmospheric sources to the terrestrial cycle. Furthermore, ammonia  $\text{NH}_3$  is toxic (Fromm and Gillette, 1968) and this requires ascertaining its concentration level in an inhabited environment.

Finally, the Pisciarelli site appears suitable for the biota and the life evolution studies. Here, the water-dominance, nitrogen richness,  $\leq 200$  °C temperatures and supergenic conditions are all needed ingredients for the growth of the organic substance and organisms (Jaffe, 2000). Consequently, this site could become a natural laboratory for investigating the complex organic-inorganic interface/relations through multidisciplinary collaborations among mineralogists, geochemists, petrologists, volcanologists, and biologists.

## 6 Appendix

### Appendix A

XRDP and DRIFT-FTIR spectra were acquired at the Osservatorio Vesuviano (Istituto Nazionale di Geofisica e Vulcanologia, Naples, Italy).

The XRDP instrument was a PANalytical X’Pert equipped with a high speed PIXcel detector (Mormone et al., 2014). The configuration includes Ni-filter,  $\text{CuK}\alpha$  radiation, pyrolytic graphite crystal monochromator, 40 kV and 40 mA current, 3–70°, 2 $\theta$  range, 0.02° steps and 8 s/step. X’Pert HIGH Score Plus computer program and JCPDS PDF-2 database allowed the interpretation of diffraction patterns.

DRIFT was mounted on a Nicolet 670 Nexus<sup>TM</sup> both by ThermoFisher Scientific S.p.a.. The FTIR comprises a heated ceramic (Global) source, a 670 Laser unit, a KBr beamsplitter, and an MCT detector, constantly purged from a high-pressure Nitrox dry air and  $\text{CO}_2$ -trapping 280 generator by Domnick Hunter. The OMNIC Data Collector 5.2© allows data collection and interpretation in the investigated range of 5000 - 400  $\text{cm}^{-1}$  (resolution:  $<0.1$   $\text{cm}^{-1}$ ). Data collection was conducted on KBr mixed with 5 – to – 10 % of sample by grinding in an agate mortar, following the background acquisition for the KBr powder. Additional acquisition on no diluted samples allowed checking for possible hygroscopic effects, obtaining similar results.

The appearance, morphology and chemical composition of minerals were determined on selected samples prepared as opaque mounts coated by cord and rod graphite, by JEOL and ZEISS electron microscope (EDS-BSEM) facilities. The JEOL-JSM 5310, equipped with a Link EDS and a Inca 4.08 software (CISAG Laboratory University of Napoli Federico II), has operating conditions of 15 kV accelerating voltage, 50–100 mA filament current, variable spot size and 50 s net acquisition time. ZEISS instrument is a SIGMA field emission scanning electron microscopy (Osservatorio Vesuviano, department of Istituto



Nazionale di Geofisica e Vulcanologia, Naples, Italy), equipped with XMAN micro-analysis system by Oxford, controlled by a SMARTSEM and AZTEC softwares. Operating conditions for SIGMA were 15 kV accelerating voltage, 50–100 mA filament current, 5–10 nm spot size and variable time acquisition time (several to tens of seconds).

Rock geochemistry (WRG) were carried out at Bureau Laboratories Ltd. (Vancouver, Canada). Major elements were analysed by Inductively Coupled Plasma Emission Spectrometer (ICP-ES) using  $\text{LiBO}_2/\text{Li}_2\text{B}_4\text{O}_7$  fusion, minor and trace elements were determined by inductively coupled plasma-mass spectrometry (ICP-MS) using a four acid ( $\text{HNO}_3\text{-HClO}_4\text{-HF-HCl}$ ) digestion. The uncertainty is generally <1% for major/minor oxides, <5–20% for trace elements. LECO was used for determining the C and S abundances. Loss on ignition (LOI) was calculated by weight loss after ignition at 1000°C.

Sulfur and oxygen isotope measurements were performed directly on pure mineral separates without and with further chemical preparation in the stable isotope laboratory at the Institut für Geologie und Paläontologie (University of Münster). Chemical preparation was different depending on sample type: i.e., sulfates+elemental S+sulfides, elemental S +sulfides, or muds. Oxidized S-bearing and multi-phases samples first required the extraction of sulfate by sample leaching in a 10% NaCl solution, filtration through a 0.45 micron cellulose acetate filter, and followed by the addition of 8.5% barium chloride solution to precipitate dissolved sulfate as barium sulfate for isotope measurements. Elemental S and pyrite extraction was performed on sulfate-free powders. This extraction consisted of a wet chemical treatment (acidic chromous chloride solution at sub-boiling conditions) that liberates sulfur as hydrogen sulfide which will ultimately be precipitated as silver sulfide, ready for isotope measurements. Elemental sulphur was liberated from each sample via acetone leaching and subsequently converted to silver sulfide applying the acidic chromous chloride treatment (Canfield et al., 1986). Again, resulting hydrogen sulfide was precipitated as silver sulfide ( $\text{Ag}_2\text{S}$ ). For S-isotope measurements, mineral separates as well as silver sulfide precipitates were homogeneously mixed with vanadium pentoxide in tin capsules and combusted in a Carlo Erba elemental analyzer interfaced to a ThermoFinnigan Delta Plus mass spectrometer (EAIRMS: Elemental Analyzer-Isotope Ratio Mass Spectrometry). Results are reported in the standard delta notation ( $\delta^{34}\text{S}$ ) as per mil difference to the Vienna Canyon Diablo Troilite (VCDT) standard. Reproducibility as determined through replicate measurements was generally better than  $\pm 0.3\%$ . Sulfates were also measured for O-isotopes by using a ThermoFinnigan TC/EA interfaced with a ThermoFinnigan Delta Plus XL. Results are reported in the standard delta notation ( $\delta^{18}\text{O}$ ) as per mil difference to the Vienna Standard Mean Ocean Water (VSMOW) standard. Reproducibility as determined through replicate measurements was generally better than  $\pm 0.5\%$ .

## 7 Supplement

Three supplementary tables:

Table S1 – List of samples, collection date, temperature and mineralogical associations as resulting by XRD analyses and detailed by FTIR study. The sampling includes water spring sampled at Stufe di Nerone. In the temperature column: tc, thermo couple (see chapter 2.2 Sampling and analytical techniques), infr, infrared gun. In the mineralogy column: ?, for minerals to



be further investigated; minerals in red are approximate attribution based on XRD patterns. The orange cells evidence water samples.

Table S2 – Vibration modes and related tentative assignment of functional groups, and mineral attribution for selected samples  
5 by DRIFT-FTIR investigations. Alu = alunite, Clay = illite/montmorillonite, Masc = NH<sub>4</sub> - bearing sulfates, am = amorphous, Kao = kaolinite, KA1 = alum - (K). ?, uncertain attribution.

Table S3 – Selected whole-rock geochemistry of multi-phases materials sampled at different locations (i.e., sample name as  
in Fig. 1) within the Pisciarelli and Solfatara areas and at different times. MDL indicates the detection limit for major, trace,  
10 C and S contents.

## 8 Team list

Suspendisse a elit ut leo pharetra cursus sed quis diam. Nullam dapibus, ante vitae congue egestas, sem ex semper orci, vel sodales sapien nibh sed lectus. Etiam vehicula lectus quis orci ultricies dapibus. In sit amet lorem egestas, pretium sem sed, tempus lorem.

## 15 9 Author contribution

MP and AM conducted sampling campaigns and prepared samples for analyses. GB participated in some of the sampling campaigns. AM conducted the XRPD analyses and interpreted the spectra. MP acquired, elaborated and interpreted the DRIFT-FT-IR spectra and, in collaboration with AM and GB, performed the EDS-BSEM investigations. HS determined the stable isotope values; MP did data representations and stable isotope data modelling. MP prepared the manuscript. All authors  
20 contributed into the final manuscript.

## 10 Acknowledgements

Osservatorio Vesuviano (Istituto Nazionale di Geofisica e Vulcanologia) funded analyses of whole-rock geochemistry; we are therefore grateful to the Directors, namely Giuseppe De Natale and Francesca Bianco. The study also benefits of the INGV fund FIRS 08-6-5-056 granted to M. Piochi. We are also grateful to colleagues at the Osservatorio Vesuviano: Rosario Avino  
25 is kindly thanked for BG sample collections in 2018, Enrica Marotta and Pasquale Belviso who provided thermos-probe. Dr Angarano, Tennis Hotel and Stufe di Nerone allowed the free access at the sampling sites.





## 11 References

- Aiuppa, A., Avino, R., Brusca, L., Caliro, S., Chiodini, G., D'Alessandro, W., Favara, R., Federico, C., Ginevra, W., Inguaggiato, S., Longo, M., Pecoraino, G., and Valenza, M.: Mineral control of arsenic content in thermal waters from volcano-hosted hydrothermal systems: Insights from island of Ischia and Phlegrean Fields (Campanian Volcanic Province, Italy), *Chem. Geol.*, 229, 313-330, doi:10.1016/j.chemgeo.2005.11.004, 2006.
- Aiuppa, A., Tamburello, G., Di Napoli, R., Cardellini, C., Chiodini, G., Giudice, G., Grassa, F., and Pedone, M.: First observations of the fumarolic gas output from a restless caldera: Implications for the current period of unrest (2005–2013) at Campi Flegrei. *Geochem. Geophys. Geosyst.*, 14, doi:10.1002/ggge.20261, 2013.
- Allard, P., Maiorani, A., Tedesco, D., Cortecchi, G., and Turi B.: Isotopic study of the origin of sulfur and carbon in Solfatara fumaroles, Campi Flegrei caldera, *J. Volcanol. Geotherm. Res.*, 48, 139-159, doi: 10.1016/0377-0273(91)90039-3, 1991.
- Alloway, B.J.: Heavy metals in soils: Trace Metals and Metalloids in Soils and their Bioavailability, Springer Dordrecht Heidelberg New York London, pp 613 doi:10.1007/978-94-007-4470-7, 2013.
- Arribas, A.: Characteristics of high-sulfidation epithermal deposits, and their relation to magmatic fluid. In Thompson, J.F.H. (Ed): *Magma, fluids and ore deposits*, Min. Ass. Canada, Short Course Notes, 23, 419-454, 1995.
- Bagnato, E., Barra, M., Cardellini, C., Chiodini, G., Parello, F., and Sprovieri, M.: First combined flux chamber survey of mercury and CO<sub>2</sub> emissions from soil diffuse degassing at Solfatara of Pozzuoli crater, Campi Flegrei (Italy): Mapping and quantification of gas release, *J. Volcanol. Geotherm. Res.*, 289, 26–40, doi:10.1016/j.jvolgeores.2014.10.017, 2014.
- Barberi, F., Corrado, G., Innocenti, F., and Luongo, G.: Phlegrean Fields 1982–1984: Brief chronicle of a volcano emergency in a densely populated area, *Bull. Volcanol.*, 47, 175–185, doi: 10.1007/BF01961547, 1984.
- Bodnar, R.J., Cannatelli, C., De Vivo, B., Lima, A., Belkin, H.E., and Milia, A.: Quantitative model for magma degassing and ground deformation (bradyseism) at Campi Flegrei, Italy: Implications for future eruptions, *Geology*, 35, 9, 791-794, doi:10.1130/G23653A.1, 2007.
- Bruno, P.P.G., Ricciardi, G.P., Petrillo, Z., Di Fiore, V., Troiano, A., and Chiodini, G.: Geophysical and hydrogeological experiments from a shallow hydrothermal system at Solfatara Volcano, Campi Flegrei, Italy: Response to caldera unrest, *J. Geophys. Res.*, 112, B06201, doi:10.1029/2006JB004383, 2007.
- Caliro, S., Chiodini, G., Moretti, R., Avino, R., Granieri, D., Russo, M., and Fiebig, J.: The origin of the fumaroles of La Solfatara (Campi Flegrei, South Italy), *Geochim. Cosmochim. Acta*, 71, 3040-3055, doi: doi.org/10.1016/j.gca.2007.04.007, 2007.
- Canfield, D.E., Raiswell, R., Westrich, J.T., Reaves, C.M., and Berner, R.A.: The use of chromium reduction in the analysis of reduced inorganic sulfur in sediments and shales, *Chem. Geol.*, 54, 149-155, doi:10.1016/0009-2541(86)90078-1, 1986.
- Capaccioni, B., and Mangani, F.: Monitoring of active but quiescent volcanoes using light hydrocarbon distribution in volcanic gases: the results of 4 years of discontinuous monitoring in the Campi Flegrei (Italy), *Earth Planet. Sci. Lett.*, 188, 543-555, doi: 10.1016/S0012-821X(01)00338-7, 2001.

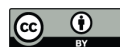

- Cardellini, C., Chiodini, G., Frondini, F., Avino, R., Bagnato, E., Caliro, S., Lelli, M., and Rosiello, A.: Monitoring diffuse volcanic degassing during volcanic unrests: the case of Campi Flegrei (Italy). *Scientific Reports*, 7, doi:10.1038/s41598-017-06941-2, 2017.
- Carlino, S., Somma, R., Troise, C., and De Natale, G.: The geothermal exploration of Campanian volcanoes: historical review and future development, *Renew. Sust. Energ. Rev.*, 16, 1004-1030, doi:10.1016/j.rser.2011.09.023, 2012.
- Celico, P.: *Prospezioni idrogeologiche*, Vol I, Vol II, Liguori, Italy, 1272 pp, 1986.
- Celico, P., Dall'Aglio, M., Ghiara, M.R., Stanzione, D., Brondi, M., and Prosperi, M.: Geochemical monitoring of the thermal fluids in the Phlegraean Fields from 1970 to 1990, *Boll. Soc. Geol. It.*, 111, 409-422, 1992.
- Chiodini, G., Comodi, P., and Giaquinto, S.: Ammonia and boric acid in steam and water. Experimental data from geothermal wells in the phlegrean fields, Naples, Italy, *Geothermics*, 17, 711-718, 1988.
- Chiodini, G., Frondini, F., Cardellini, C., Granieri, D., Marini, L., and Ventura, G.: CO<sub>2</sub> degassing and energy release at Solfatara volcano, Campi Flegrei, Italy, *J. Geophys. Res.*, 106, 213-221, doi: 10.1029/2001JB000246, 2001.
- Chiodini, G., Caliro, S., Cardellini, C., Granieri, D., Avino, R., Baldini, A., Donnini, M., and Minopoli, C.: Long-term variations of the Campi Flegrei, Italy, volcanic system as revealed by the monitoring of hydrothermal activity, *J. Geophys. Res.*, 115, B03205, doi:10.1029/2008JB006258, 2010.
- Chiodini, G., Paonita, A., Aiuppa, A., Costa, A., Caliro, S., De Martino, P., Acocella, V., and Vandemeulebrouck, J.: Magmas near the critical degassing pressure drive volcanic unrest towards a critical state, *Nat. Comm.*, 7, 13712, doi:doi.org/10.1038/ncomms13712, 2016.
- Ciniglia, C., Valentino, G. M., Cennamo, P., De Stefano, M., Stanzione, D., Pinto, G., and Pollio, A.: Influences of geochemical and mineralogical constraints on algal distribution in acidic hydrothermal environments: Pisciarelli (Naples, Italy) as a model site, *Archiv. für Hydrob.*, 162, 121-142, 2005.
- Clark, R.N., King, T.V.V., Klejwa, M., Swayze, G.A., and Vergo, N.: High spectral resolution reflectance spectroscopy of minerals, *J. Geophys. Res.*, *Solid Earth*, 95, 12653-12680, doi:10.1029/JB095iB08p12653, 1990.
- Clark, R.N., Swayze, G.A., Wise, R., Livo, E., Hoefen, T., Kokaly, R., and Sutley, S.J.: USGS digital spectral library splib06a: U.S. Geological Survey, Digital Data Series 231, <http://speclab.cr.usgs.gov/spectral.lib06>, 2007.
- Corrado, G., Guerra, I., Lo Bascio, A., Luongo, G., and Rampoldi, F.: Inflation and microearthquake activity of Phlegraean Fields, Italy, *Bull. Volcanol.*, 40 (3), 169-188, doi:10.1007/BF02596998, 1976.
- Cortecci, G., Noto, P., and Panichi, C.: Environmental isotopic study of the Campi Flegrei (Naples, Italy) geothermal field, *J. Hydrol.*, 36, 146-159, doi:10.1016/0022-1694(78)90044-6, 1978.
- D'Auria, L., Giudicepietro, F., Aquino, I., Borriello, G., Del Gaudio, C., Lo Bascio, D., Martini, M., Ricciardi, G.P., Ricciolino, P., and Ricco, C.: Repeated fluid-transfer episodes as a mechanism for the recent dynamics of Campi Flegrei caldera (1989-2010), *J. Geophys. Res.*, 116, B04313, doi:10.1029/2010JB007837, 2011.
- de Vita, S., Orsi, G., Civetta, L., Carandente, A., D'Antonio, M., Deino, A., di Cesare, T., Di Vito, M.A., Fisher, R.V., Isaia, R., Marotta, E., Necco, A., Ort, M., Pappalardo, L., Piochi, M., and Southon, J.: The Agnano-Monte Spina eruption (4100



- years BP) in the restless Campi Flegrei caldera (Italy), *J. Volcanol. Geotherm. Res.*, 91, 269–301, doi: 10.1016/S0377-0273(99)00039-6, 1999.
- De Vivo, B., Belkin, H.E., Barbieri, M., Chelini, W., Lattanzi, P., Lima, A., and Tolomeo, L.: The Campi Flegrei (Italy) geothermal system: A fluid inclusion study of the Mofete and San Vito fields, *J. Volcanol. Geotherm. Res.*, 36, 303-326, doi:10.1016/0377-0273(89)90076-0, 1989.
- Di Giuseppe, M.G., Troiano, A., Patella, D., Piochi, M., and Carlino, S.: A geophysical k-means cluster analysis of the Solfatara-Pisciarelli volcano-geothermal system, Campi Flegrei (Naples, Italy), *J. App. Geophys.*, doi:10.1016/j.jappgeo.2017.06.001, 2017.
- Di Luccio, F., Pino, N. A., Piscini, A., and Ventura, G.: Significance of the 1982–2014 Campi Flegrei seismicity: Preexisting structures, hydrothermal processes, and hazard assessment, *Geophys. Res. Lett.* 42, 7498–7506, doi:10.1002/2015GL064962.1, 2015.
- Di Vito, M.A, Isaia, R., Orsi, G., Southon, J., de Vita, S., D’Antonio, M., Pappalardo, L., and Piochi, M.: Volcanism and deformation since 12,000 years at the Campi Flegrei caldera (Italy), *J. Volcanol. Geotherm. Res.*, 91, 221-246, doi:10.1016/S0377-0273(99)00037-2, 1999.
- Ercan, H.Ü., Işık, E. Ö., Schroeder, P.A., and Karacik, Z.: Differentiating Styles of Alteration Within Kaolin-Alunite Hydrothermal Deposits of Çanakkale, NW Turkey, *Clays Clay Miner.*, 64, 245-274, 30, doi:10.1346/CCMN.2016.0640305, 2016.
- Ferrara, R., Maserti, B.E., De Liso, A., Cioni, R., Raco, B., Taddeucci, G., Edner, H., Ragnarson, P., Svanberg, S., and Wallinder, E.: Atmospheric mercury emission at Solfatara volcano (Pozzuoli, Phlegraean Fields - Italy), *Chemosphere*, 29, 1421-1428, doi:10.1016/0045-6535(94)90275-5, 1994.
- Fromm, P.O., and Gillette, J.R.: Effect of ambient ammonia on blood ammonia and nitrogen excretion of rainbow trout (*salmo gairdneri*), *Comparative Biochemistry and Physiology*, 26, 887-896, 1968.
- Fitos, M., Badogiannis, E.G., Tsivilis, S.G., and Perraki, M.: Pozzolan activity of thermally and mechanically treated kaolins of hydrothermal origin, *App. Clay Sci.*, 116–117, 182–192, doi:10.1016/j.clay.2015.08.028, 2015.
- Giacomelli, L., and Scandone, R.: History of the exploitation of thermo-mineral resources in Campi Flegrei and Ischia, Italy, *J. Volcanol. Geotherm. Res.*, 209-210, 19-32, 2012.
- Glamoclija, M., Garrel, L., Berthon, J., and Lopez-Garcia, P.: Biosignatures and bacterial diversity in hydrothermal deposits of Solfatara Crater, Italy, *Geomicrobiol. J.*, 21, 529–541, doi:10.1080/01490450490888235, 2004.
- Gresse, M., Vandemeulebrouck, J., Byrdina, S., Chiodini, G., Revil, A., Johnson, T.C., Ricci, T., Vilardo, G., Mangiacapra, A., Lebourg, T., Grangeon, J., Bascou, P., and Metral, L.: Three-Dimensional Electrical Resistivity Tomography of the Solfatara Crater (Italy): Implication for the Multiphase Flow Structure of the Shallow Hydrothermal System, *J. Geophys. Res.*, Solid Earth, 122, doi:10.1002/2017JB014389, 2017.
- Guglielminetti, M.: Mofete geothermal field, *Geothermics*, 15, 781-790, doi:10.1016/0375-6505(86)90091-X, 1986.

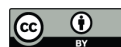

- Hedenquist, J.W., Arribas, A., Jr., and Gonzales-Urien, E.: Exploration for epithermal gold deposits, *Rev. Economic Geology*, 13, 245-277, 2000.
- Henley, R.D., and Ellis, A.J.: Geothermal systems ancient and modern: a geochemical review, *Earth Sci. Rev.*, 19, 1-50, doi:10.1016/0012-8252(83)90075-2, 1983.
- 5 Holloway, J.M., and Dahlgren, R.A.: Nitrogen in rock: Occurrences and biogeochemical implications, *Global Biogeochemical cycles*, 16, 1118, doi:10.1029/2002GB001862, 2002.
- Jaffe, D.A.: The nitrogen cycle, In Jacobson, M.C., Charlson, R.J., Rohde, H., and Orians, G.H. (Ed.), *Earth system science*, Academic Press, San Diego, Calif, 322-342, 2000.
- Lowe, S.E., Mahendra, K.J., and Zeikus, J.G.: Biology, Ecology, and Biotechnological Applications of Anaerobic Bacteria  
10 Adapted to Environmental Stresses in Temperature, pH, Salinity, or Substrates, *Microbiol. Rev.*, 451-509, 1993.
- Madejová, J.: FTIR techniques in clay mineral studies, *Vib. Spectrosc.*, 31, 1–10, doi:10.1016/S0924-2031(02)00065-6, 2003.
- Madejová, J., and Komadel, P.: Baseline studies of the clay minerals society source clays: infrared methods, *Clays Clay Min*, 49, 5, 410-432, 2001.
- Martini, M., Giannini, L., Buccianti, A., Prati, F., Cellini, Legittimo, P., Iozzelli, P., and Capaccioni, B.: 1980-1990: Ten years  
15 of geochemical investigation at Phlegrean Fields (Italy), *J. Volcanol. Geotherm. Res.*, 48, 161-171, doi:10.1016/0377-0273(91)90040-7, 1991.
- Mather, T.A., Oppenheimer, C., Allen, A.G., and McGonigle A.J.S.: Aerosol chemistry of emissions from three contrasting volcanoes in Italy, *Atmos. Environ.*, 38, 5637-5649, doi:10.1016/j.atmosenv.2004.06.017, 2004.
- Montanaro, C., Mayer, K., Isaia, R., Gresse, M., Scheu, B., Yilmaz, T.I., Vandemeulebrouck, J., Ricci, T., and Dingwell, D.B.:  
20 Hydrothermal activity and subsoil complexity: implication for degassing processes at Solfatara crater, Campi Flegrei caldera, *Bull. Volcanol.*, 79, 83, doi:10.1007/s00445-017-1167-z, 2017.
- Moretti, R., De Natale, G., and Troise, C.: A geochemical and geophysical reappraisal to the significance of the recent unrest at Campi Flegrei caldera (Southern Italy), *Geochem. Geophys. Geosyst.*, 18, 1244–1269, doi:10.1002/2016GC006569, 2017.
- Mormone, A., Piochi, M., Troise, C., and De Natale, G.: Il laboratorio di Diffrattometria a raggi X dell'Osservatorio Vesuviano  
25 (Istituto Nazionale di Geofisica e Vulcanologia, Napoli): identificazione e stima quantitativa delle fasi in campioni polverizzati, *Rapporti tecnici INGV*, 279: 7-21, ISSN 2039-7941, 2014.
- Ohmoto, H., and Rye, R.O.: Isotopes of sulfur and carbon. In: *Geochemistry of Hydrothermal Ore Deposits*, In Barnes, H.L. (Ed.), Wiley, New York, 509– 567, 1979.
- Parafiniuk, J., and Kruszewky, L.: Minerals of the ammonioalunit-ammoniojarosite series e formed on a burning coal dump at  
30 Czerwionka, Upper Silesian Coal Basin, *Mineral. Mag.*, 74(4), 731–745, doi:10.1180/minmag.2010.074.4.731, 2010.
- Photos-Jones, E., Christidis, G.E., Piochi, M., Keane, C., Mormone, A., Balassone, G., Perdikatsis, V., and Leanord, A.: Testing Greco-Roman medicinal minerals: The case of solfataric alum, *J. Archaeol. Sci. Rep.*, 10, 82–95, doi:10.1016/j.jasrep.2016.08.042, 2016.



- Piochi, M., Bruno, P.P., and De Astis, G.: Relative roles of rifting tectonics and magma uprising processes: inferences from geophysical, structural and geochemical data of the Neapolitan volcanic region (southern Italy), *Gcubed*, 6(7), 1-25, doi:10.1029/2004GC000885, 2005.
- Piochi, M., Kilburn, C. R. J., Di Vito, M. A., Mormone, A., Tramelli, A., Troise, C., and De Natale, G.: The volcanic and geothermally active Campi Flegrei caldera: an integrated multidisciplinary image of its buried structure, *Int. J. Earth Sci.*, 10, 401-421, doi:10.1007/s00531-013-0972-7, 2014.
- Piochi, M., Mormone, A., and Balassone, G.: Hydrothermal alteration environments in the recent dynamics of the Ischia volcanic island (Southern Italy): clues from repeated field, mineralogical and geochemical surveys across the 2017 earthquake of Casamicciola, *J. Volcanol. Geotherm. Res.*, under revision, 2019.
- 10 Piochi, M., Mormone, A., Balassone, G., Strauss, H., Troise, C., and De Natale, G.: Native sulfur, sulfates and sulfides from the active Campi Flegrei volcano (southern Italy): Genetic environments and degassing dynamics revealed by mineralogy and isotope geochemistry, *J. Volcanol. Geotherm. Res.*, 304, 180–193, doi: 10.1016/j.volgeores.2015.080.017, 2015.
- Rittmann, A.: Sintesi geologica dei Campi Flegrei, *Boll. Soc. Geol. It.*, 69, 117–28, 1950.
- Rosi, M., and Sbrana, A.: Phlegrean Fields: Petrography, *Quaderni de La Ricerca Scientifica*, 114, 9, 60-79, 1987.
- 15 Russo, M., Campostrini, I., Demartin, F.: I minerali di origine fumarolica dei Campi Flegrei: Solfatarà di Pozzuoli (Napoli) e dintorni, *Periodi dell'AMI, Micro 3*, 15, 2017.
- Rye, R.O.: A review of the stable-isotope geochemistry of sulfate minerals in selected igneous environments and related hydrothermal systems, *Chem. Geol.*, 215, 5–36., doi:10.1016/j.chemgeo.2004.06.034, 2005.
- Rye, R.O., Bethke, P.M., and Wasserman, M.D.: The stable isotope geochemistry of acid sulfate alteration, *Econ. Geol.*, 87, 225–262., doi:10.2113/gsecongeo.87.2.225, 1992.
- 20 Saccorotti, G., Petrosino, S., Bianco, F., Castellano, M., Galluzzo, D., La Rocca, M., Del Pezzo, E., Zaccarelli, L., and Cusano, P.: Seismicity associated with the 2004–2006 renewed ground uplift at Campi Flegrei Caldera, Italy, *Phys. Earth Planet. In.*, 165, 14-24, doi:10.1016/j.pepi.2007.07.006, 2007.
- Sgavetti, M., Pompilio, L., Roveri, M., Manzi, V., Valentino, G.M., Lugli, S., Carlia, C., Amici, S., Marchese, F., and Lacava, T.: Two geologic systems providing terrestrial analogues for the exploration of sulfate deposits on Mars: initial spectral characterization, *Planet. Sp. Sci.*, doi:10.1016/j.pss.2008.05.010, 2008.
- 25 Sicardi, L.: La Solfatarà di Pozzuoli, *Bull. Vulcanol.*, 18, 151-158, 1959.
- Sillitoe, R.H.: Epithermal models: genetic types, geothermal controls and shallow features, in Kirkham, R.V., Sinclair, W.D., Thorpe, R.I., and Duke, J.M. (eds), *Mineral Deposit Modeling*, Geological Association of Canada Special Paper, 40, 403-417, 30 1993.
- Simón, M., Martín, F., García, I., Bouza, P., Dorronsoro, C., and Auilar, J.: Interaction of limestone grains and acidic solutions from the oxidation of pyrite tailings, *Environ. Pollut.*, 135, 65-72, doi:10.1016/j.envpol.2004.10.013, 2005.
- Stoffregen, R.E., and Alpers, C.N.: Observations on the unit-cell dimension, water content and  $\delta D$  of natural and synthetic alunite, *Am. Mineral.*, 77, 1092-1099, 1992.



- Toumi, M., and Tlili, A.: Rietveld Refinement and Vibrational Spectroscopic Study of Alunite from El Gnater, Central Tunisia, *Russian Journal of Inorganic Chemistry*, 53, 1845–1853, 2008.
- Valentino, G.M., Corcecci, G., Franco, E., and Stanzione, D.: Chemical and isotopic compositions of minerals and waters from the Campi Flegrei volcanic system, Naples, Italy, *J. Volcanol. Geotherm., Res.*, 91, 329344, doi: 10.1016/S0377-5 0273(99)00042-6, 1999.
- Valentino, G.M., and Stanzione, D.: Source processes of the thermal waters from the Phlegraean Fields (Naples, Italy) by means of the study of selected minor and trace elements distribution, *Chem. Geol.*, 194, 245–274, doi:10.1016/S0009-2541(02)00196-1, 2003.
- Valentino, G.M., and Stanzione, D.: Geochemical monitoring of the thermal waters of the Phlegraean Fields, *J. Volcanol. Geotherm. Res.*, 133, 1–4, 261-289, doi:10.1016/S0377-0273(03)00402-5; 2004.
- Vaselli, O., Tassi, F., and Tedesco, D.: Submarine and inland gas discharges from the Campi Flegrei (southern Italy) and the Pozzuoli Bay: geochemical clues for a common hydrothermal-magmatic source, *Procedia Earth Planet. Sci.*, 4, 57–73, doi:10.1016/j.proeps.2011.11.007, 2011.
- Ventriglia, U. Rilievo Geologico dei campi Flegrei, *Soc. Geol. It. Bull.*, 69, 265-334, 1942.
- 15 White, N.C. and Hedenquist, J.W.: Epithermal environments and styles of mineralization: variations and their causes, and guidelines for exploration, II, In Hedenquist, J.W., White, N.C., and Siddeley G. (eds), *Epithermal Gold Mineralization of the Circum-Pacific: Geology, Geochemistry, Origin and Exploration*, *J. Geochem. Explor.*, 36, 445-474, doi:10.1016/0375-6742(90)90063-G, 1990.
- Zillig, W., Prangishvili, D., Schleper, C., Elferink, M., Holz, I., Albers, A., Janekovic, D., and Götz, D.: Viruses, plasmids and other genetic elements of thermophilic and hyperthermophilic Archaea, *Microbiol. Rev.*, 18, 225–236, doi:10.1111/j.1574-6976.1996.tb00239.x, 1996.
- Zotov, A., Mukhamet-Galeev, A., and Schott, J.: An experimental study of kaolinite and dickite relative stability at 150-300°C and the thermodynamic properties of dickite, *Am. Mineral.*, 83, 516-524, doi:10.2138/am-1998-5-610, 1998.

25

### Caption of Figures and Tables

- Figure 1 – (a) The investigated acid sulfate areas (gray shaded) of Puteolis within the Campi Flegrei caldera (Italy): the Solfatara crater, Pisciarelli, Cinofilo, Antignana, Terme di Agnano. The map shows relevant structures: lava domes (dashed line), fault systems (point-dash lines), La Starza marine terrace, the Astroni explosive crater and the Agnano Plain. (b) Pisciarelli pool on June 2018; (c) new pool at Solfatara on September 2017. (d) the Solfatara crater with sampling sites, notably the Bocca Grande fumarole and La Fangaia mud pool. (e) the Pisciarelli sampling sites, notably Geiser vent and mud pool (L3), the later delineated by shaded lines defining the observed widening variations.
- 30



Figure 2 – (a) Dendritic crystals of native sulphur growing on the alunite-dominant matrix; (b) native sulfur fibres that are typically detected in L60 and in several exhalative vents on PINT, PEXT and L20; (c) encrustations of alunite and alunogen at L1; (d) pyrite in the mud; (e)  $\text{NH}_4$ -sulfates from evaporated L60 water; (f)  $\text{NH}_4$ -sulfates from evaporated L3 water. All images were taken using a binocular microscope. Refer to Fig. 1a,d,e for listed sites.

5

Figure 3 – BSEM image showing sample texture and occurrences of S-bearing phases identified by EDS and XRPD analyses at the Puteolis sulfate lands: (a) orthorhombic baryte (Ba) front of pentagonal pyrite (Py) from the Pisciarelli mud (L3); (b) irregular platy alunogene (Alu) oriented parallel to the fracture axis; (c) rhombic native sulfur (S) with bladed tschermigite crystals (Ts); (d) acicular alunogene (Alu) crystals developed above early tabular alunogen species; (e) euhedral alunite grains (Al) showing resorbed surfaces and coexisting with tabular alunogen (Alu) and acicular gypsum (Gy) crystals; (f) massive alunite (Al) encrustation; (g) pseudo-cubic ammonium chloride ( $\text{ClNH}_4$ ) crystals within encrustation sampled at Bocca Grande (BG); (h) monoclinic realgar (Rlg) and ammonium chloride ( $\text{ClNH}_4$ ) individuals at Bocca Grande (BG); (i) grains coated by pyrite and massive letovicite crystals. Alu = alunogene; Al = alunite; Ba = barite;  $\text{ClNH}_4$  = ammonium chloride (salammoniac); Gy = gypsum; Ltv = letovicite; py = pyrite; Rlg = realgar; S = native S; Ts = tschermigite. Sample name as in Table S1. Refer to Fig. 1e for site location.

15

Figure 4 – FT-IR spectra of  $\text{NH}_4$  - sulfates (a), native sulfur (b) and various muds from Solfatara (c), Pisciarelli (d) and the new Solfatara hole (e). See Table S2 for vibrational modes and relative assignments.

Figure 5 - Distribution of  $\delta^{34}\text{S}$  values for sulfides (a), native sulfur (b) and sulfates (c), and of  $\delta^{18}\text{O}$  values for sulfates at the different sampling sites arranged by sampling date. Results from cores collected in 1965, and 1971, 1984, 2013 and 2014 are compiled from the literature (i.e., Ref: Cortecchi et al., 1978; Valentino et al., 1999; Valentino and Stanzione, 2003; 2004; Piochi et al., 2015). Sampling sites are shown in Fig. 1a,d,e. Note the values are plotted based on sample sites, from west to east.

25

Figure 6 - Distribution of  $\delta^{34}\text{S}$  values among coexisting sulfates, sulfides and native sulfur, organized on the basis of the sampling sites. Note: (i) the nearly similar values of sulfates and sulfides at Solfatara coherent with supergene setting; (ii) the higher  $\delta^{34}\text{S}$  values in sulfides at Pisciarelli indicating a different, likely not biogenic (in that case sulfated must be heavy), process or stage; (iii) a likely positive correlations between Solfatara sulfides and sulfates (panel a).

30

Figure 7 - Covariation of  $\delta^{34}\text{S}$  vs.  $\delta^{18}\text{O}$  values in sulfates, symbolized to distinguish the specific materials on the basis of sampling sites. Modern marine sulfate, meteoric water (out in the diagram), the  $\delta^{18}\text{O}$  values of local gas emissions and literature data (Ref) based on Cortecchi et al. (1978), Allard et al. (1991), Valentino et al. (1999), Chiodini et al. (2000), Caliro et al. (2007), Chiodini et al. (2008) and Piochi et al. (2015).  $\delta^{18}\text{O}$  values of local outgassing is -2 to 0‰. Fields and processes based



on Rye et al. (1992) and Rye (2005). Panel a) highlights Solfatara and Pisciarelli samples; shaded areas define the  $\delta^{18}\text{O}$  values we recalculated based on Rye et al. (1992) at the indicated temperature.

Figure 8 - Lithophile (a) and sidero-chalcophile (b) element concentrations normalized in respect to the average whole-rock composition of pristine volcanic rocks with an age < 5 ka (D'Antonio et al., 1999; Piochi et al., 2014), as those outcropping in the Puteolis sulfate areas. \* in legend other dataset.

Figure 9 – Crossplots of trace elements in solfataric samples. Fields envelopes the various genetic settings, following Ercan et al. (2016) and based on the (a) immobile and (b) and mobile elements sourced from K-feldspars (Ba, Sr, Ce, Y, La), in an initially alteration undersaturated geothermal solution.

Figure 10 - Measured vs. theoretical fractionation values. Theoretical values based on temperature measurements were calculated following Ohmoto and Rye (1979) and Rye et al. (1992). Fields for steam-heated (white) and supergene (gray) environments are from Rye et al. (1992); dashed envelop for Alunite-Pyrite (circle) or Alunite- $\text{H}_2\text{S}$  (rhombus) pairs, continuous envelop for Alunite- $\text{H}_2\text{O}$ .

Figure 11– Sketch of the acid-sulfate alteration zone at the Campi Flegrei caldera (Fig. 1a). Subsurface is constrained by borehole (deep from Rosi and Sbrana, 1987; Piochi et al., 2014 and shallow from de Vita et al., 1999) and geophysics (Di Giuseppe et al., 2017) information. The presence of  $\text{NH}_4$ -rich aquifers correlate with their occurrence in marine sequences (Rosi and Sbrana, 1987; Piochi et al., 2014) at the Mofete wells (Chiodini et al., 1988). In the legend P-wave velocity, resistivity and density (with respect to  $2.4 \text{ g/cm}^3$ ) from Di Giuseppe et al. (2017); the geophysically explored area is in the dashed rectangle. BG = bocca grande (Fig. 1d); LF = La Fangaia mud pool (Fig. 1a,d).

Table 1 – Main hydrothermal minerals detected by XRPD with related ideal chemical formula and sites of occurrence (name as in Fig. 1a,d,e). The complete set of minerals is in Table S1.

Table 2 –  $\delta^{34}\text{S}$  vs.  $\delta^{18}\text{O}$  values of sulfur-bearing minerals. Sample name as in Table 1 and S1; the muds are in italic. \* in Fig. 1; † from google earth.

Table 3 – Summary of the mineralogical and isotopical features at the acid sulfate area following Rye et al. (1992); Hedenquist and Lowerstern (1994). \*highest  $^{34}\text{S}$  and  $^{18}\text{O}$  during bacteriogenic reduction of sulfates with maximum fractionation in dry-wet alternating conditions.  $\wedge \delta^{34}\text{S}$  reflects the  $\text{H}_2\text{S}/\text{SO}_2$  and temperature of fluid. 1 always present, 2 may be associated. 3 from Valentino and Stanzione (2003; 2004), Gresse et al. (2017).





5 Table S1 – List of samples, collection date, temperature and mineralogical associations as resulting by XRD analyses and detailed by FTIR study. The sampling includes water spring sampled at Stufe di Nerone. In the temperature column: tc, thermo couple (see chapter 2.2 Sampling and analytical techniques), infr, infrared gun. In the mineralogy column: ?, for minerals to be further investigated; minerals in red are approximate attribution based on XRD patterns. The orange cells evidence water samples.

10 Table S2 – Vibration modes and related tentative assignment of functional groups, and mineral attribution for selected samples by DRIFT-FTIR investigations. Alu = alunite, Clay = illite/montmorillonite, Masc = NH<sub>4</sub> - bearing sulfates, am = amorphous, Kao = kaolinite, KAl = alum - (K). ?, uncertain attribution.

15 Table S3 – Selected whole-rock geochemistry of multi-phases materials sampled at different locations (i.e., sample name as in Fig. 1) within the Pisciarelli and Solfatara areas and at different times. MDL indicates the detection limit for major, trace, C and S contents.



## Figures and Tables

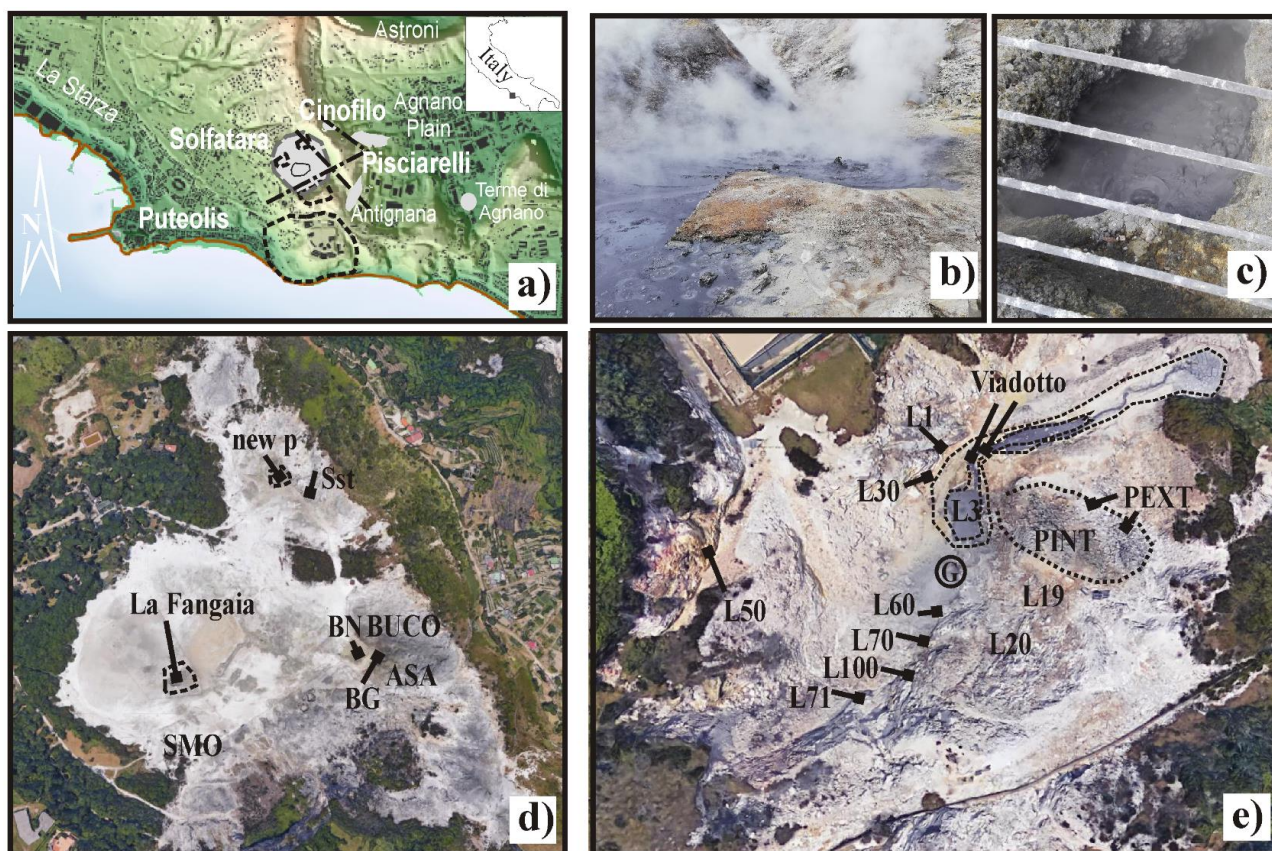

Figure 1 – (a) The investigated acid sulfate areas (gray shaded) of Puteolis within the Campi Flegrei caldera (Italy): the Solfatara crater, Pisciarelli, Cinofilo, Antignana, Terme di Agnano. The map shows relevant structures: lava domes (dashed line), fault systems (point-dash lines), La Starza marine terrace, the Astroni explosive crater and the Agnano Plain. (b) Pisciarelli pool on June 2018; (c) new pool at Solfatara on September 2017. (d) the Solfatara crater with sampling sites, notably the Bocca Grande fumarole and La Fangaia mud pool. (e) the Pisciarelli sampling sites, notably Geiser vent and mud pool (L3), the later delineated by shaded lines defining the observed widening variations.

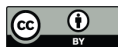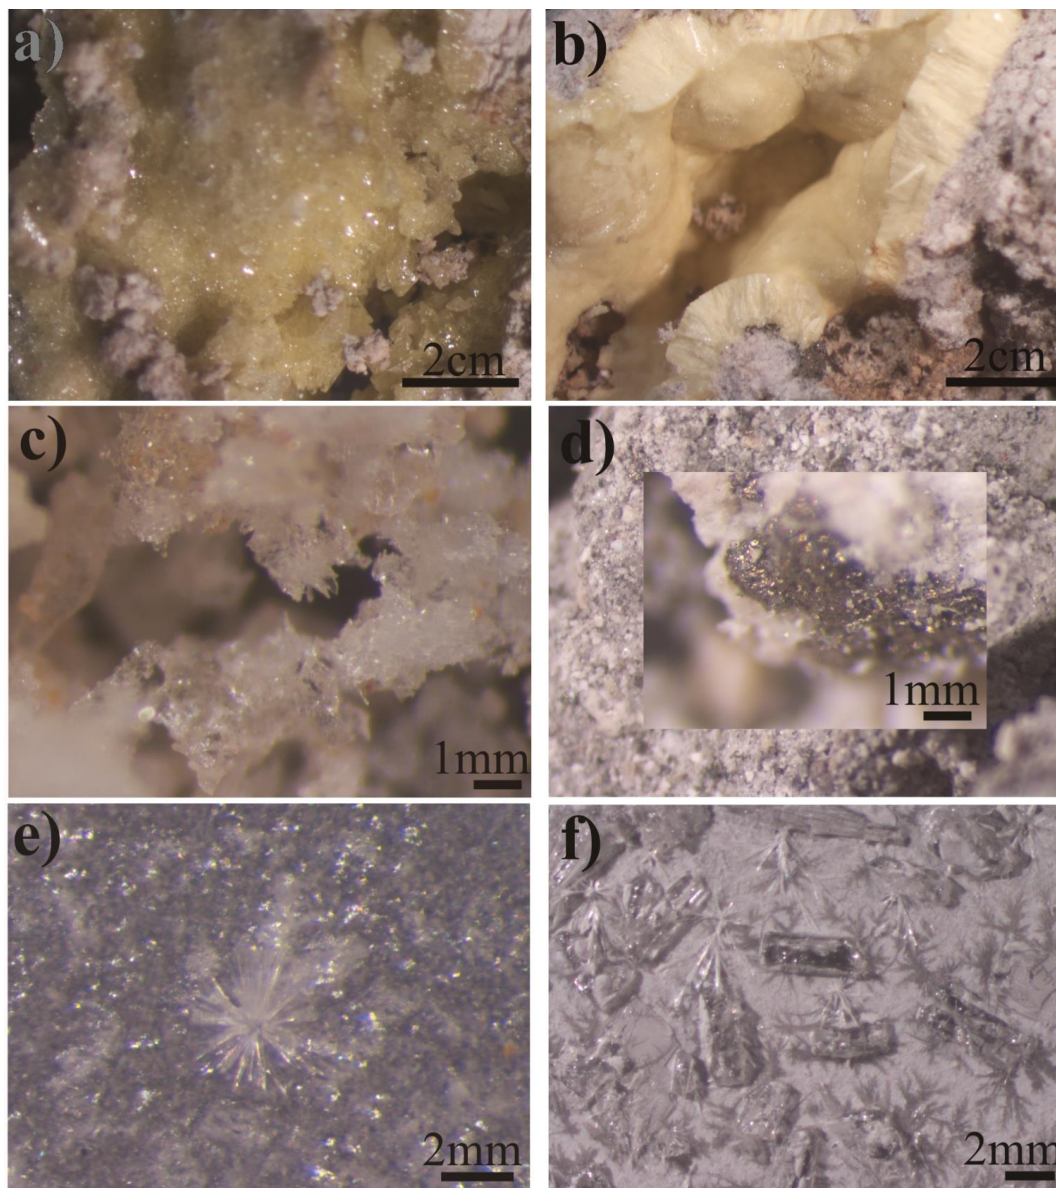

Figure 2 – (a) Dendritic crystals of native sulphur growing on the alunite-dominant matrix; (b) native sulfur fibres that are typically detected in L60 and in several exhalative vents on PINT, PEXT and L20; (c) encrustations of alunite and alunogen at L1; (d) pyrite in the mud; (e)  $\text{NH}_4$ -sulfates from evaporated L60 water; (f)  $\text{NH}_4$ -sulfates from evaporated L3 water. All images were taken using a binocular microscope. Refer to Fig. 1a,d,e for listed sites.

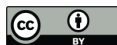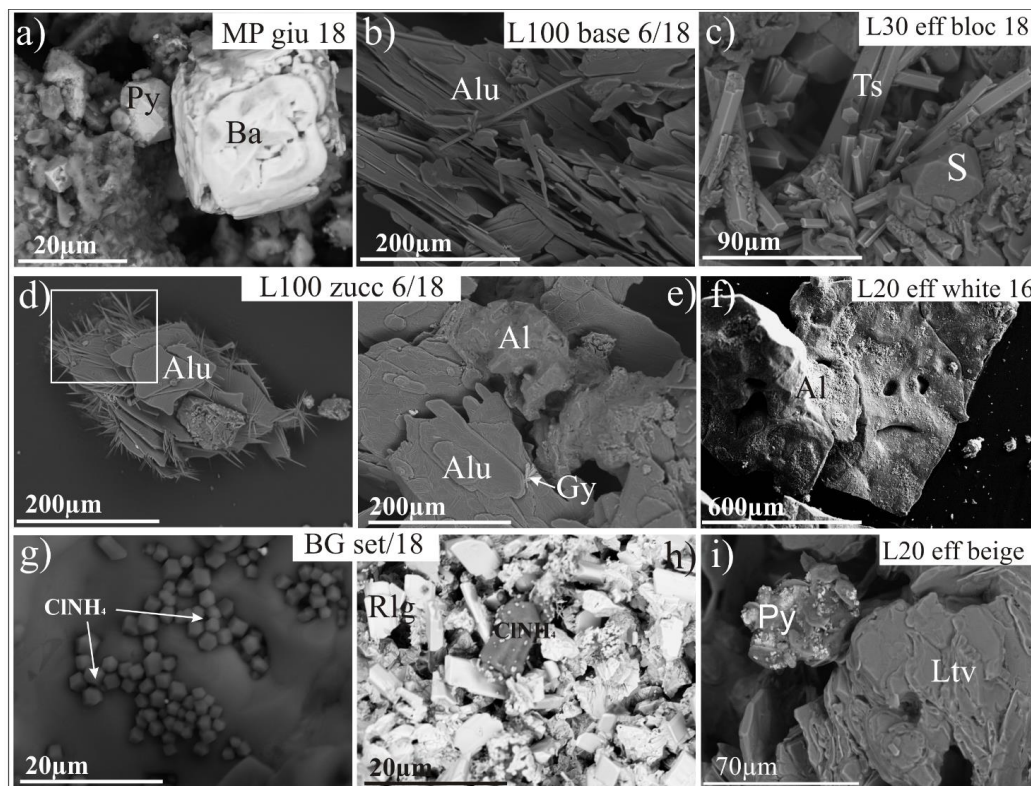

Figure 3 – BSEM image showing sample texture and occurrences of S-bearing phases identified by EDS and XRPD analyses at the Puteolis sulfate lands: (a) orthorhombic baryte (Ba) front of pentagonal pyrite (Py) from the Pesciarelli mud (L3); (b) irregular platy alunogene (Alu) oriented parallel to the fracture axis; (c) rhombic native sulfur (S) with bladed tschermigite crystals (Ts); (d) acicular alunogene (Alu) crystals developed above early tabular alunogen species; (e) euhedral alunite grains (Al) showing resorbed surfaces and coexisting with tabular alunogen (Alu) and acicular gypsum (Gy) crystals; (f) massive alunite (Al) encrustation; (g) pseudo-cubic ammonium chloride ( $\text{CINH}_4$ ) crystals within encrustation sampled at Bocca Grande (BG); (h) monoclinic realgar (Rlg) and ammonium chloride ( $\text{CINH}_4$ ) individuals at Bocca Grande (BG); (i) grains coated by pyrite and massive letovicite crystals. Alu = alunogene; Al = alunite; Ba = barite;  $\text{CINH}_4$  = ammonium chloride (salammoniac); Gy = gypsum; Ltv = letovicite; py = pyrite; Rlg = realgar; S = native S; Ts = tschermigite. Sample name as in Table S1. Refer to Fig. 1e for site location.

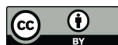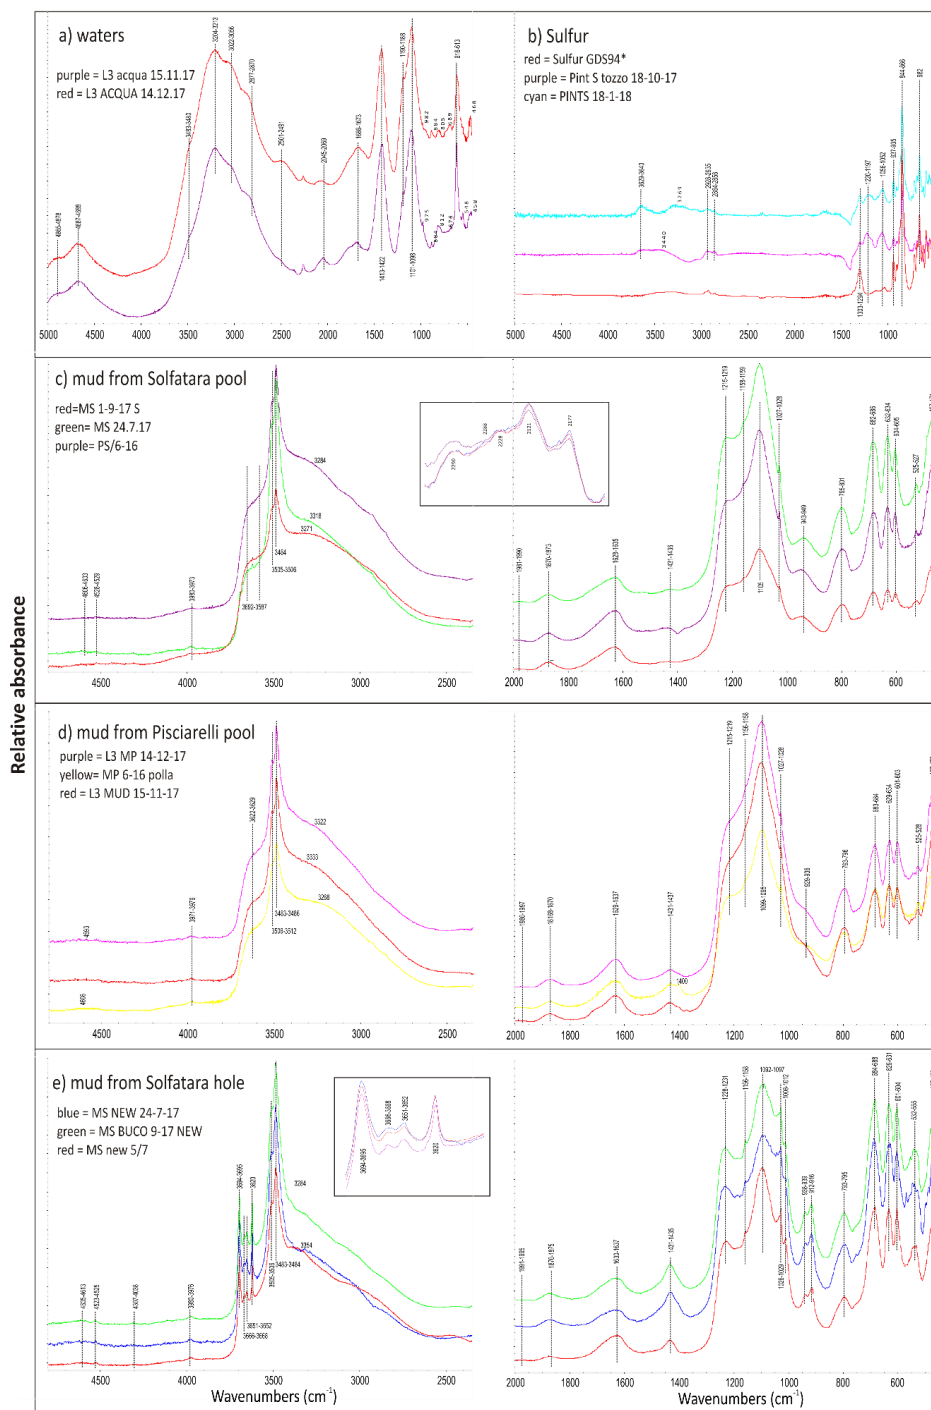

Figure 4 – FT-IR spectra of NH<sub>4</sub>-sulfates (a), native sulfur (b) and various muds from Solfatara (c), Pisciarelli (d) and the new Solfatara hole (e). See Table S2 for vibrational modes and relative assignments.

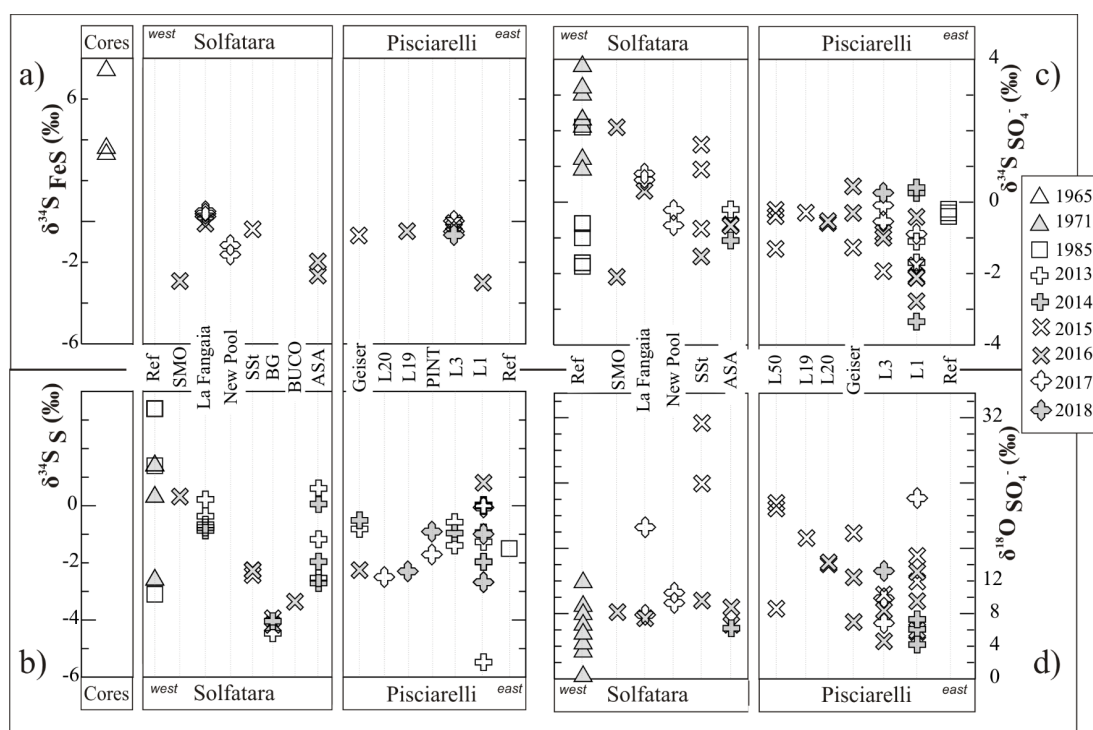

Figure 5 - Distribution of  $\delta^{34}\text{S}$  values for sulfides (a), native sulfur (b) and sulfates (c), and of  $\delta^{18}\text{O}$  values for sulfates at the different sampling sites arranged by sampling date. Results from cores collected in 1965, and 1971, 1984, 2013 and 2014 are compiled from the literature (i.e., Ref: Cortecchi et al., 1978; Valentino et al., 1999; Valentino and Stanzone, 2003; 2004; Piochi et al., 2015). Sampling sites are shown in Fig. 1a,d,e. Note the values are plotted based on sample sites, from west to east.

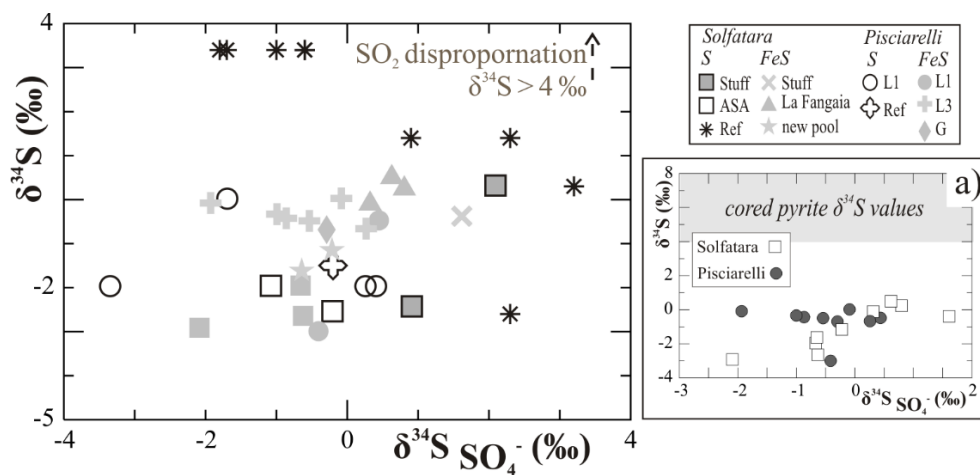

Figure 6 - Distribution of  $\delta^{34}\text{S}$  values among coexisting sulfates, sulfides and native sulfur, organized on the basis of the sampling sites. Note: (i) the nearly similar values of sulfates and sulfides at Solfatara coherent with supergene setting; (ii) the higher  $\delta^{34}\text{S}$  values in sulfides at Pisciarelli indicating a different, likely not biogenic (in that case sulfated must be heavy), process or stage; iii) a likely positive correlations between Solfatara sulfides and sulfates (panel a).

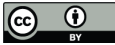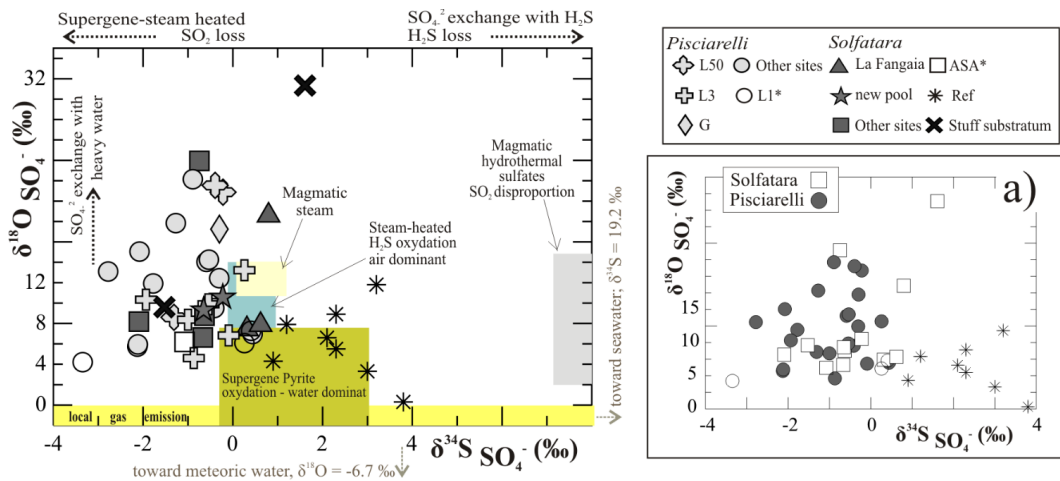

Figure 7 - Covariation of  $\delta^{34}\text{S}$  vs.  $\delta^{18}\text{O}$  values in sulfates, symbolized to distinguish the specific materials on the basis of sampling sites. Modern marine sulfate, meteoric water (out in the diagram), the  $\delta^{18}\text{O}$  values of local gas emissions and literature data (Ref) based on Cortecci et al. (1978), Allard et al. (1991), Valentino et al. (1999), Chiodini et al. (2000), Caliro et al. (2007), Chiodini et al. (2008) and Piochi et al. (2015).  $\delta^{18}\text{O}$  values of local outgassing is -2 to 0‰. Fields and processes based on Rye et al. (1992) and Rye (2005). Panel a) highlights Solfatara and Pisciarelli samples; shaded areas define the  $\delta^{18}\text{O}$  values we recalculated based on Rye et al. (1992) at the indicated temperature. Fields and processes based on Rye et al. (1992) and Rye (2005). Panel a) highlights Solfatara and Pisciarelli samples; shaded areas define the  $\delta^{18}\text{O}$  values we recalculated based on Rye et al. (1992) at the indicated temperature.

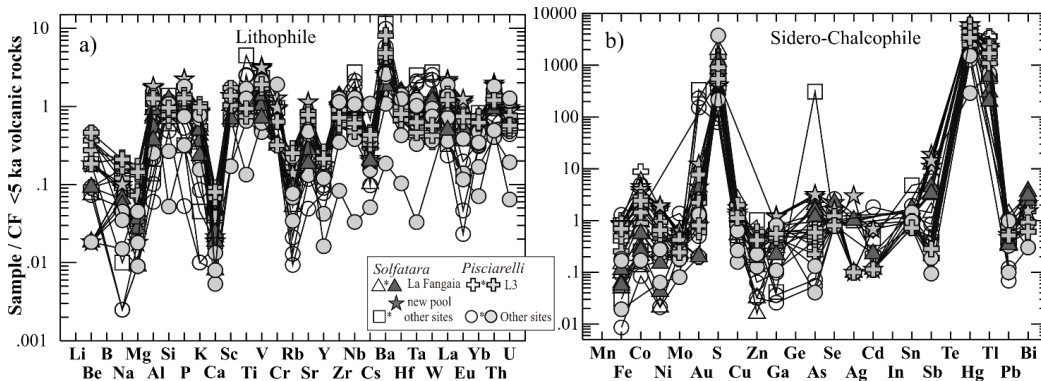

Figure 8 - Lithophile (a) and sidero-chalcophile (b) element concentrations normalized in respect to the average whole-rock composition of pristine volcanic rocks with an age < 5 ka (D'Antonio et al., 1999; Piochi et al., 2014), as those outcropping in the Puteolis sulfate areas. \* in legend other dataset.



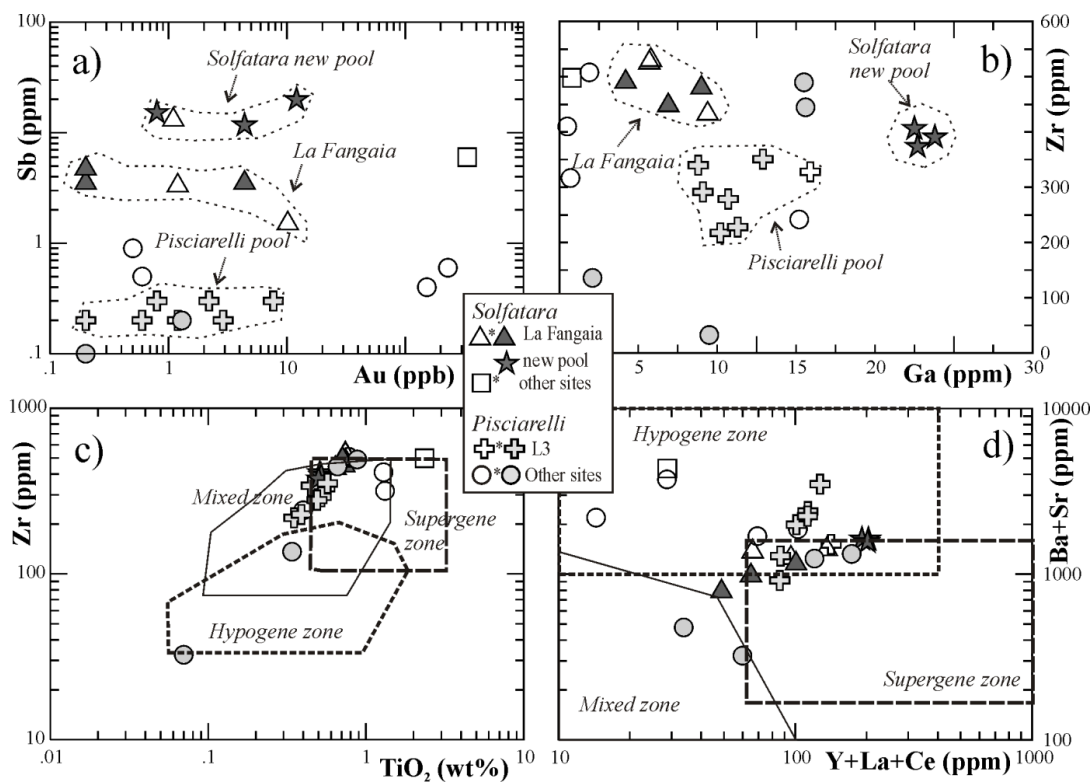

Figure 9 – Crossplots of trace elements in solfataric samples. Fields envelopes the various genetic settings, following Ercan et al. (2016) and based on the (a) immobile and (b) and mobile elements sourced from K-feldspars (Ba, Sr, Ce, Y, La), in an initially alteration undersaturated geothermal solution.

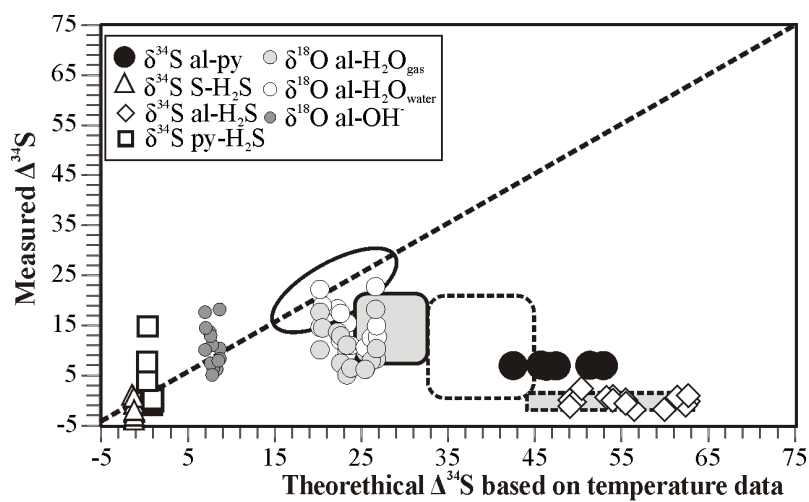

Figure 10 - Measured vs. theoretical fractionation values. Theoretical values based on temperature measurements were calculated following Ohmoto and Rye (1979) and Rye et al. (1992). Fields for steam-heated (white) and supergene (gray) environments are from Rye et al. (1992): dashed envelop for Alunite-Pyrite (circle) or Alunite-H<sub>2</sub>S (rhombus) pairs, continuous envelop for Alunite-H<sub>2</sub>O.

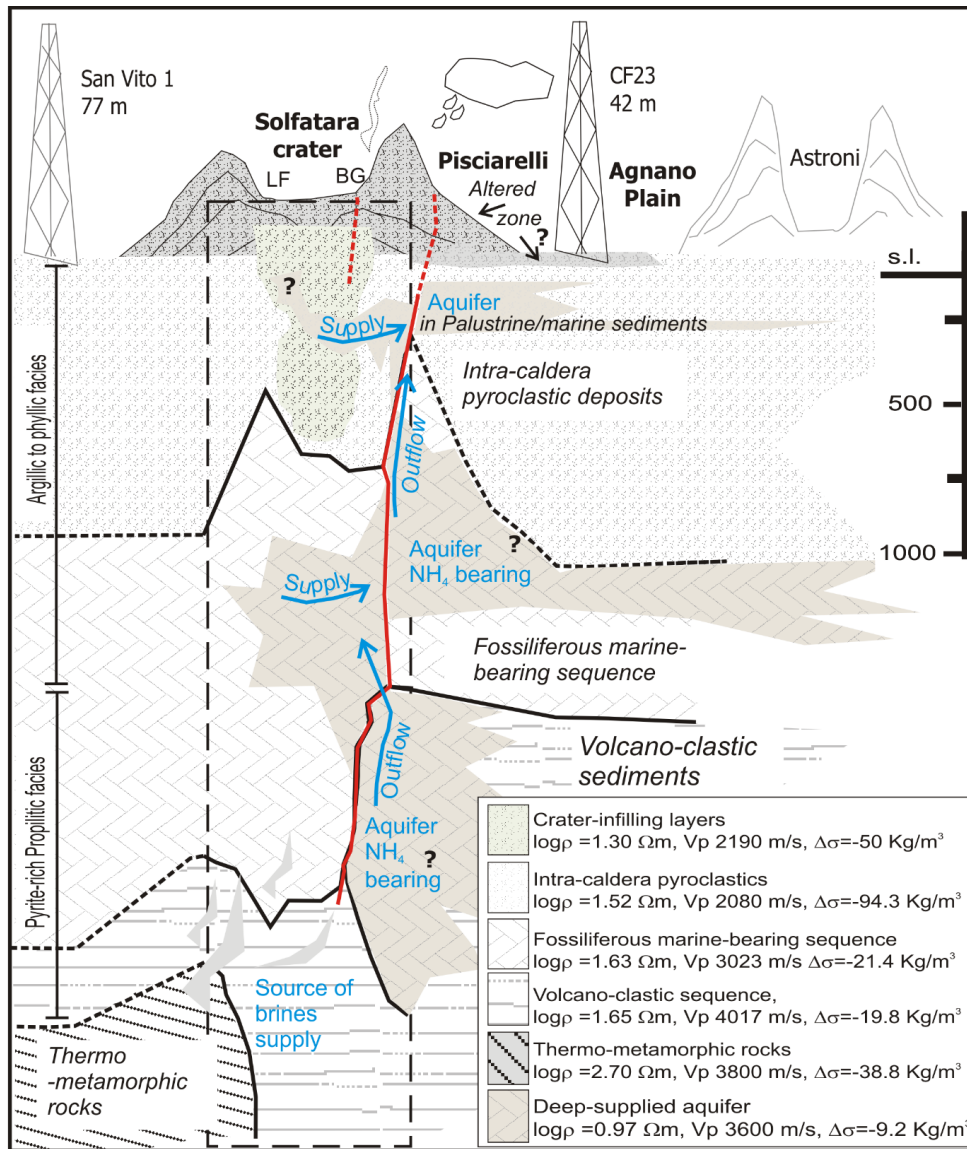

Figure 11– Sketch of the acid-sulfate alteration zone at the Campi Flegrei caldera (Fig. 1a). Subsurface is constrained by borehole (deep from Rosi and Sbrana, 1987; Piochi et al., 2014 and shallow from de Vita et al., 1999) and geophysics (Di Giuseppe et al., 2017) information. The presence of NH<sub>4</sub>-rich aquifers correlate with their occurrence in marine sequences (Rosi and Sbrana, 1987; Piochi et al., 2014) at the Mofete wells (Chiodini et al., 1988). In the legend P-wave velocity, resistivity and density (with respect to 2.4 g/cm<sup>3</sup>) from Di Giuseppe et al. (2017); the geophysically explored area is in the dashed rectangle. BG = bocca grande (Fig. 1d); LF = La Fangaia mud pool (Fig. 1a,d).



Table 1 – Main hydrothermal minerals detected by XRPD with related ideal chemical formula and sites of occurrence (name as in Fig. 1a,d,e). The complete set of minerals is in Table S1.

| Phase                                 | Composition                                               | Location                                     |
|---------------------------------------|-----------------------------------------------------------|----------------------------------------------|
| Alunite                               | $KAl_3(SO_4)_2(OH)_6$                                     | Ubiquitarius                                 |
| Alunogen                              | $Al_2(SO_4)_3 \cdot 17(H_2O)$                             | L1, SSt, L30, CIN, L100                      |
| Alum-(K)                              | $KAl(SO_4)_2 \cdot 12(H_2O)$                              | L1, L20, PP1                                 |
| Alum-(Na)                             | $NaAl(SO_4)_2 \cdot 12(H_2O)$                             | L50, New P, L20                              |
| Amarillite                            | $NaFe^{3+}(SO_4)_2 \cdot 6(H_2O)$                         | L1                                           |
| Biotite                               | $K(Mg, Fe^{++})_3[AlSi_3O_{10}(OH, F)_2]$                 | MS, L3                                       |
| Chabazite                             | $(Ca_{0.5}, Na, K)_4[Al_4Si_8O_{24}] \cdot 12H_2O$        | L50, L30                                     |
| Clairite                              | $(NH_4)_2Fe^{3+}_3(SO_4)_4(OH)_3 \cdot 3(H_2O)$           | G                                            |
| Coquimbite                            | $Fe^{++}_2(SO_4)_3 \cdot 9(H_2O)$                         | L50, L3, L1                                  |
| Gypsum                                | $CaSO_4 \cdot 2(H_2O)$                                    | L50, L20, L3, L60, CIN                       |
| Halotrichite                          | $Fe^{++}Al_2(SO_4)_4 \cdot 22(H_2O)$                      | G                                            |
| Hexahydrate                           | $Mg(SO_4) \cdot 6(H_2O)$                                  | CIN                                          |
| Hematite                              | $Fe_2O_3$                                                 | PINT, L3                                     |
| Kaolin                                | $Al_2Si_2O_5(OH)_4$                                       | New P, PINT, L19, L20                        |
| Koktaite                              | $(NH_4)_2Ca(SO_4)_2 \cdot (H_2O)$                         | L3                                           |
| Illite                                | $(K, H_3O)(Al, Mg, Fe)_2(Si, Al)_4O_{10}[(OH)_2, (H_2O)]$ | MS, L20, L3, L50, CIN, G                     |
| Jarosite                              | $KFe^{+++}_3(SO_4)_2(OH)_6$                               | L50, G, CIN, L30                             |
| Letovicite                            | $(NH_4)_3H(SO_4)_2$                                       | L3, L1, L20                                  |
| Marialite                             | $Na_4Al_3Si_9O_{24}Cl$                                    | L3                                           |
| Mascagnite                            | $(NH_4)_2SO_4$                                            | L1, G, L20, L3                               |
| Mereiterite                           | $K_2Fe^{2+}(SO_4)_2 \cdot 4(H_2O)$                        | L1                                           |
| Minamiite                             | $Na_{0.6}Ca_{0.3}K_{0.1}Al_3(SO_4)_2(OH)_6$               | New P                                        |
| Mohrite                               | $(NH_4)_2Fe^{2+}(SO_4)_2 \cdot 6(H_2O)$                   | L3                                           |
| Montmorillonite                       | $(Na, Ca)_{0.3}(Al, Mg)_2Si_4O_{10}(OH)_2 \cdot n(H_2O)$  | L50, L3, L20, CIN                            |
| Natroalunite                          | $NaAl_3(SO_4)_2(OH)_6$                                    | L60                                          |
| Periclase                             | $MgO$                                                     | SSt                                          |
| Pickeringite                          | $MgAl_2(SO_4)_4 \cdot 22(H_2O)$                           | L1                                           |
| Picropharmacolite                     | $Ca_4Mg(AsO_3OH)_2(AsO_4)_2 \cdot 11(H_2O)$               | CIN                                          |
| Pyrite                                | $FeS_2$                                                   | L3, BG, ASA, L1, G, New P, MS, L20, viadotto |
| Realgar                               | $As_4S_4$                                                 | BG                                           |
| Rostite                               | $AlSO_4(OH, F) \cdot 5(H_2O)$                             | SSt,                                         |
| Salammoniac                           | $(NH_4)Cl$                                                | BG                                           |
| Sulfur                                | $S^0, S_8, \text{beta}$                                   | Ubiquitarius, subordinated in L3             |
| Silica essentially as opal and quartz | $SiO_2$                                                   | SSt, L1, BG, CIN, L20, L50                   |
| Tamarugite                            | $NaAl(SO_4)_2 \cdot 6(H_2O)$                              | L20, CIN                                     |
| Tschermigite                          | $(NH_4)Al(SO_4)_2 \cdot 12(H_2O)$                         | L20, L3, L60, L70, G                         |
| Vermiculite                           | $(Mg, Fe^{++}, Al)_3(Al, Si)_4O_{10}(OH)_2 \cdot 4(H_2O)$ | L3                                           |
| Voltaite                              | $K_2Fe^{2+}_5Fe^{3+}_3Al(SO_4)_{12} \cdot 18(H_2O)$       | L1vent, L100, G                              |
| Zaherite                              | $Al_{12}(SO_4)_5(OH)_{26} \cdot 20(H_2O)$                 | G, CIN, L100                                 |



Table 2 –  $\delta^{34}\text{S}$  vs.  $\delta^{18}\text{O}$  values of sulfur-bearing minerals. Sample name as in Table 1 and S1; the muds are in italic. \* in Fig. 1; †from google earth.

| Type                          | Sample                        | $\delta^{34}\text{S}$<br>[‰] | st.<br>dev. | $\delta^{18}\text{O}$<br>[‰] | st.<br>dev. | Date     | Location* | T<br>(°C) | Height<br>(m)† |      |
|-------------------------------|-------------------------------|------------------------------|-------------|------------------------------|-------------|----------|-----------|-----------|----------------|------|
| <b>Pisciarelli</b>            |                               |                              |             |                              |             |          |           |           |                |      |
| Sulfate                       | L1d1 al/11-15                 | -1.78                        | 0.06        | 11.93                        | 0.23        | 1.11.15  | L1        | -         | 67             |      |
|                               | L1d2 white/11-15              | -2.08                        | 0.05        | 15.05                        | 0.44        | 1.11.15  | L1        | -         | 67             |      |
|                               | <i>MP/11-15</i>               | -1.93                        | 0.01        | 10.33                        | 0.00        | 1.11.15  | L3        | -         | 66             |      |
|                               | P PP1/11-15                   | -0.30                        | 0.21        | 17.25                        | 0.08        | 1.11.15  | G         | 92        | 68             |      |
|                               | P PPb/11-15                   | -1.27                        | 0.13        | 17.85                        | 0.41        | 1.11.15  | G         | 50.2      | 69             |      |
|                               | P L50 yellow                  | -0.22                        | 0.15        | 20.88                        | 0.16        | 1.11.15  | L50       | -         | 84             |      |
|                               | P L50 white                   | -0.40                        | 0.02        | 21.54                        | 0.27        | 1.11.15  | L50       | -         | 84             |      |
|                               | P L50 red                     | -1.31                        | 0.02        | 8.59                         | 0.40        | 1.11.15  | L50       | -         | 84             |      |
|                               | L1v PGw/6-16                  | -2.78                        | 0.07        | 13.09                        | 0.43        | 1.6.16   | L50       | -         | 66.5           |      |
|                               | L1 Pwh/6-16                   | -2.13                        | 0.00        | 5.72                         | 0.30        | 1.6.16   | L1        | 56.9      | 67             |      |
|                               | L1 Psalt/6-16                 | -2.12                        | 0.13        | 5.95                         | 0.19        | 1.6.16   | L1        | 67        | 67             |      |
|                               | L1 Pblack/6-16                | -0.41                        | 0.04        | 9.52                         | 0.21        | 1.6.16   | L1        | -         | 67             |      |
|                               | <i>MP/6-16</i>                | -0.87                        | 0.01        | 4.60                         | 0.05        | 1.6.16   | L3        | 70        | 66             |      |
|                               | GnvW bl/6-16                  | 0.44                         | 0.01        | 6.96                         | 0.51        | 1.6.16   | L19       | 74.7      | 68             |      |
|                               | Gnv W be/6-16                 | -0.31                        | 0.23        | 12.44                        | 0.22        | 1.6.16   | L19       | 74.7      | 69             |      |
|                               | PL20 v1/6-16                  | -0.59                        | 0.06        | 14.04                        | 0.15        | 1.6.16   | L20       | 90        | 71             |      |
|                               | <i>Ps 7-16</i>                | -1.00                        | 0.08        | 8.37                         | 0.06        | 1.7.16   | L3        | -         | 66             |      |
|                               | PL 20V1 7-16                  | -0.53                        | 0.02        | 14.26                        | 0.03        | 1.7.16   | L20       | -         | 71             |      |
|                               | <i>MP 29.6.17</i>             | -0.09                        | 0.03        | 6.82                         | 0.2         | 29.6.17  | L3        | -         | 66             |      |
|                               | L1 beije 18.9.17              | -0.89                        | 0.02        | 22.14                        | 0.51        | 18.9.17  | L1        | -         | 67             |      |
|                               | <i>MP L3 bocchetta 1.9.17</i> | -0.54                        | 0.02        | 9.87                         | 0.5         | 1.9.17   | L3        | 49.5      | 66             |      |
|                               | <i>MP 18.1.18</i>             | 0.26                         | 0.06        | 13.21                        | 0.2         | 18.1.18  | L3        | 77.1      | 66             |      |
|                               | Sulfide                       | <i>MP/11-15</i>              | -0.08       | 0.05                         |             |          | 1.11.15   | L3        | -              | 66   |
|                               |                               | P PP1/11-15                  | -0.69       | 0.07                         |             |          | 1.11.15   | G         | 92             | 68   |
|                               |                               | L1 Pblack/6-16               | -3.00       | 0.07                         |             |          | 1.6.16    | L1        | -              | 67   |
|                               |                               | <i>MP/6-16</i>               | -0.43       | 0.13                         |             |          | 1.6.16    | L3        | 70             | 66   |
| GnvW bl/6-16                  |                               | -0.48                        | 0.10        |                              |             | 1.6.16   | L19       | 74.7      | 68             |      |
| <i>Ps 7-16</i>                |                               | -0.34                        | 0.01        |                              |             | 1.7.16   | L3        | -         | 66             |      |
| <i>MP 29.6.17</i>             |                               | 0.02                         | 0.02        |                              |             | 29.6.17  | L3        | -         | 66             |      |
| <i>MP L3 bocchetta 1.9.17</i> |                               | -0.49                        | 0.02        |                              |             | 1.9.17   | L3        | 49.5      | 66             |      |
| <i>MP 18.1.18</i>             |                               | -0.67                        | 0.04        |                              |             | 18.1.18  | L3        | 77.1      | 66             |      |
| Sulfur                        |                               | L1 Pv/6-16                   | 0.80        | 0.14                         |             |          | 1.6.16    | L1        | 56.9           | 66.5 |
|                               |                               | Geiser mud                   | -2.26       | 0.04                         |             |          | 1.6.16    | G         | -              | 68   |
|                               | PINT S 18.9.17                | -1.71                        | 0.06        |                              |             | 18.9.17  | PINT      | -         | 74             |      |
|                               | L1 S 18.9.17                  | -0.06                        | 0.00        |                              |             | 18.9.17  | L1        | -         | 67             |      |
|                               | L 20 camino 18.9.17           | -2.50                        | 0.02        |                              |             | 18.9.17  | L20       | -         | 76             |      |
|                               | L1 vent S 14.12.17            | -2.67                        | 0.01        |                              |             | 14.12.17 | L1        | 94.7      | 67             |      |
|                               | PINT S 18.1.18                | -0.91                        | 0.12        |                              |             | 18.1.18  | PINT      | 93.4      | 74             |      |
|                               | L1 vent S 18.1.18             | -2.68                        | 0.00        |                              |             | 18.1.18  | L1        | 94        | 67             |      |
|                               | L1 vent parete S 18.1.18      | -0.99                        | 0.05        |                              |             | 18.1.18  | L1        | 89.9      | 67.5           |      |
|                               | L19 Geiser S 18.1.18          | -2.30                        | 0.01        |                              |             | 18.1.18  | L19       | 95.8      | 70             |      |
| <b>Solfatara</b>              |                               |                              |             |                              |             |          |           |           |                |      |
| Sulfate                       | SStb/11-15                    | -0.74                        | 0.02        | 23.93                        | 0.68        | 1.11.15  | SSt       | -         | 100            |      |
|                               | SSt wr/11-15                  | 1.61                         | 0.11        | 31.33                        | 0.47        | 1.11.15  | SSt       | -         | 100            |      |
|                               | SStgc/11-15                   | 0.91                         | nd          |                              |             | 1.11.15  | SSt       | -         | 100            |      |
|                               | SMO S/6-16                    | 2.09                         | nd          |                              |             | 1.6.16   | SMO       | 87        | 109            |      |
|                               | SMO ASA/6-16                  | -2.09                        | 0.10        | 8.18                         | 0.11        | 1.6.16   | SMO       | -         | 109            |      |
|                               | ASA m/16-6                    | -0.63                        | 0.09        | 8.75                         | 0.12        | 1.6.16   | ASA       | -         | 124            |      |
|                               | ASA h/16-6                    | -0.67                        | 0.05        | 6.62                         | 0.25        | 1.6.16   | ASA       | -         | 124            |      |
|                               | SSt sub/16-6                  | -1.52                        | 0.11        | 9.59                         | 0.30        | 1.6.16   | SSt       | 92        | 101            |      |
|                               | <i>PS/6-16</i>                | 0.31                         | 0.23        | 7.43                         | 0.24        | 1.6.16   | LaFangaia | 52.9      | 94             |      |
|                               | <i>MS 29.6.17</i>             | 0.80                         | 0.00        | 18.58                        | 0.3         | 29.6.17  | LaFangaia | -         | 94             |      |
|                               | <i>MS new 29.06.17</i>        | -0.65                        | 0.13        | 9.31                         | 0.4         | 29.6.17  | new pool  | -         | 94             |      |



|                |                        |       |      |       |     |         |                  |      |     |
|----------------|------------------------|-------|------|-------|-----|---------|------------------|------|-----|
|                | <i>MS new 1.9.17</i>   | -0.22 | 0.07 | 10.56 | 0.7 | 1.9.17  | <i>new pool</i>  | 70   | 94  |
|                | <i>MS2 1.9.17</i>      | 0.62  | 0.09 | 7.84  | 0.1 | 1.9.17  | <i>LaFangaia</i> | 49.5 | 94  |
| <b>Sulfide</b> | SSt wr/11-15           | -0.38 | 0.08 |       |     | 1.11.15 | SSt              | -    | 100 |
|                | SMO ASA/6-16           | -2.92 | 0.08 |       |     | 1.6.16  | SMO              | -    | 109 |
|                | ASA m/16-6             | -2.65 | 0.08 |       |     | 1.6.16  | ASA              | -    | 124 |
|                | ASA h/16-6             | -1.96 | 0.09 |       |     | 1.6.16  | ASA              | -    | 124 |
|                | <i>PS/6-16</i>         | -0.11 | 0.07 |       |     | 1.6.16  | <i>LaFangaia</i> | -    | 94  |
|                | <i>MS 29.6.17</i>      | 0.24  | 0.11 |       |     | 29.6.17 | <i>LaFangaia</i> | -    | 94  |
|                | <i>MS new 29.06.17</i> | -1.63 | 0.02 |       |     | 29.6.17 | <i>new pool</i>  | -    | 94  |
|                | <i>MS new 1.9.17</i>   | -1.16 | 0.10 |       |     | 1.9.17  | <i>new pool</i>  | 70   | 94  |
|                | <i>MS1 1.9.17</i>      | 0.38  | 0.00 |       |     | 1.9.17  | <i>LaFangaia</i> | 49.5 | 94  |
|                | <i>MS2 1.9.17</i>      | 0.49  | 0.00 |       |     | 1.9.17  | <i>LaFangaia</i> | 49.5 | 94  |
| <b>Sulfur</b>  | BG pg/11-15            | -3.95 | 0.03 |       |     | 1.11.15 | BG               | 93.1 | 103 |
|                | SStgf/11-15            | -2.23 | 0.21 |       |     | 1.11.15 | SSt              | -    | 100 |
|                |                        | -2.13 | 0.28 |       |     | 1.11.15 | SSt              | -    | 100 |
|                |                        | -2.40 | 0.20 |       |     | 1.11.15 | SSt              | -    | 100 |
|                | SStgc/11-15            | -3.34 | 0.38 |       |     | 1.11.15 | SSt              | -    | 100 |
|                |                        | -1.52 | 0.00 |       |     | 1.11.15 | SSt              | -    | 100 |
|                |                        | -2.43 | 0.09 |       |     | 1.11.15 | SSt              | -    | 100 |
|                | BG S/6-16              | -4.42 | 0.29 |       |     | 1.6.16  | BG               | 93.2 | 103 |
|                |                        | -3.89 | 0.28 |       |     | 1.6.16  | BG               | 93.2 | 103 |
|                |                        | -4.21 | 0.21 |       |     | 1.6.16  | BG               | 93.2 | 103 |
|                | up BG S/6-16           | -3.84 | 0.06 |       |     | 1.6.16  | BUCO             | 93.2 | 106 |
|                |                        | -2.78 | 0.11 |       |     | 1.6.16  | BUCO             | 93.2 | 106 |
|                |                        | -3.46 | 0.15 |       |     | 1.6.16  | BUCO             | 93.2 | 106 |
|                | SMO S/6-16             | 0.29  | 0.28 |       |     | 1.6.16  | SMO              | 87   | 109 |
|                |                        | 0.44  | 0.24 |       |     | 1.6.16  | SMO              | 87   | 109 |
|                |                        | 0.22  | 0.04 |       |     | 1.6.16  | SMO              | 87   | 109 |
|                | SSt Sf/16-6            | -2.08 | 0.17 |       |     | 1.6.16  | SSt              | -    | 124 |
|                |                        | -2.31 | 0.06 |       |     | 1.6.16  | SSt              | -    | 124 |
|                |                        | -2.42 | 0.01 |       |     | 1.6.16  | SSt              | -    | 124 |



Table 3 – Summary of the mineralogical and isotopical features at the acid sulfate area following Rye et al. (1992); Hedenquist and Lowerstern (1994). \*highest  $^{34}\text{S}$  and  $^{18}\text{O}$  during bacteriogenic reduction of sulfates with maximum fractionation in dry-wet alternating conditions.  $^{\wedge}$   $\delta^{34}\text{S}$  reflects the  $\text{H}_2\text{S}/\text{SO}_2$  and temperature of fluid. 1 always present, 2 may be associated. 3 from Valentino and Stanzone (2003; 2004), Gresse et al. (2017).

|                                                        | Supergene $\text{H}_2\text{SO}_4$ production by sulphides oxidation           | Steam-heated $\text{H}_2\text{SO}_4$ production by $\text{H}_2\text{S}$ oxidation | Magmatic hydrothermal $\text{H}_2\text{SO}_4$ production by $\text{SO}_2$                          | Magmatic steam                              | Solfatara crater                                                       | Pisciarelli                                                                                                        |
|--------------------------------------------------------|-------------------------------------------------------------------------------|-----------------------------------------------------------------------------------|----------------------------------------------------------------------------------------------------|---------------------------------------------|------------------------------------------------------------------------|--------------------------------------------------------------------------------------------------------------------|
|                                                        |                                                                               | <b>LOW SULFIDATION</b>                                                            | <b>HIGH SULFIDATION</b>                                                                            |                                             |                                                                        |                                                                                                                    |
| Alunite texture                                        | Very thin-cryptocrystalline, younger                                          | Powdery                                                                           | up to 250 $\mu\text{m}$                                                                            | rare up to 250 $\mu\text{m}$ in vein        | thin to sub mm-sized                                                   | thin to sub mm-sized                                                                                               |
| age vs original rocks                                  | younger                                                                       | coeval                                                                            | coeval                                                                                             | coeval                                      |                                                                        |                                                                                                                    |
| Kaolinite                                              | disordered                                                                    | well-formed                                                                       | -                                                                                                  | -                                           | well-crystallized                                                      | well-crystallized                                                                                                  |
| Halloysite                                             | yes                                                                           | -                                                                                 | -                                                                                                  | -                                           | sometimes                                                              | -                                                                                                                  |
| Gossan                                                 | at the top                                                                    | -                                                                                 | -                                                                                                  | -                                           | -                                                                      | possibly locally                                                                                                   |
| Sinter                                                 | -                                                                             | widely                                                                            | -                                                                                                  | -                                           | widely                                                                 | widely                                                                                                             |
| Vuggy silica                                           | -                                                                             | -                                                                                 | at the core                                                                                        | -                                           | not present                                                            | not present                                                                                                        |
| Al solubility                                          | -                                                                             | -                                                                                 | highly leached                                                                                     | -                                           | possibly not intense to absent                                         | possibly not intense to absent                                                                                     |
| Sulfides - Pyrites                                     | widespread                                                                    | may be                                                                            | disseminated pyrites                                                                               | rare                                        | rare                                                                   | abundant pyrites                                                                                                   |
| Pyrophyllite, diaspore, covellite, enargite, lauzonite | -                                                                             | -                                                                                 | may and must be                                                                                    | rare                                        | not detected                                                           | not detected                                                                                                       |
| $\text{PO}_4$ in alunite                               | -                                                                             | -                                                                                 | yes                                                                                                | unknown                                     | not detected                                                           | not detected                                                                                                       |
| S isotope fractionation                                | nearly absent equilibria fractionation* rarely present in sulphide rich-rocks | similar to $\text{H}_2\text{S}$                                                   | equilibria fractionation, $\text{H}_2\text{S}$ -Sulfates and Sulfate-pyrite equilibria $^{\wedge}$ | equilibria fractionation with $\text{SO}_2$ | Al- $\text{H}_2\text{S}$ no equilibrium (Fig. 11)                      | Al- $\text{H}_2\text{S}$ no equilibrium Py-Al no equilibrium Py- $\text{H}_2\text{S}$ nearly equilibrium (Fig. 11) |
| O isotope in Alunite                                   | nearly absent equilibria fractionation*                                       | equilibria fractionation                                                          | equilibria fractionation $^{\wedge}$                                                               | equilibria fractionation with $\text{SO}_2$ | nearly equilibria fractionation (Fig. 11)                              | equilibria fractionation (Fig. 11)                                                                                 |
| pH                                                     | -                                                                             | Nearly neutral                                                                    | <2                                                                                                 | -                                           | Generally acid, locally at very low acid, locally neutral <sup>3</sup> | Locally/timely acid <sup>4</sup>                                                                                   |
| Fumarole T                                             | -                                                                             | 100-to-160°C                                                                      | >200°C                                                                                             | >200°C                                      | Locally >160°C                                                         | Generally $\leq 110^\circ\text{C}$                                                                                 |
| Metal                                                  | -                                                                             | $\text{Au}^1$<br>(Ag, Pb-Zn) <sup>2</sup>                                         | (Au, Ag, Cu) <sup>1</sup><br>(Hg, W, Bi, Pb, Zn) <sup>2</sup>                                      |                                             | Locally As, Hg (Fig. 9)                                                | Hg (Fig. 9)                                                                                                        |
| $\text{H}_2\text{S}/\text{SO}_4$                       | -                                                                             | -                                                                                 | 4 $\pm$ 2                                                                                          | <1                                          | <1                                                                     | 1 or higher                                                                                                        |
| S state                                                | -                                                                             | Low, $\text{S}^{2-}$                                                              | High, $\text{S}^{4+}$                                                                              | High, $\text{S}^{4+}$                       | <1                                                                     | 1 or higher                                                                                                        |
